# Supplementary material for: STAT3 is required for proliferation and exhibits a cell type-specific binding preference in mouse female germline stem cells
Source: Royal Society of Chemistry journal article supplement (doi:10.1039/c7mo00084g), 2018-02-12
Supplement: c7mo00084g1.xlsx [file c7mo00084g1.xlsx]

## Sheet: FGSC_STAT3_FDR_peaks
Chr	Start	End	Names
chr1	3309284	3310354	FGSC_Peaks_1
chr1	3902688	3903640	FGSC_Peaks_2
chr1	4378741	4379700	FGSC_Peaks_3
chr1	4407209	4408305	FGSC_Peaks_4
chr1	5151312	5152325	FGSC_Peaks_5
chr1	5917734	5918834	FGSC_Peaks_6
chr1	6220739	6221544	FGSC_Peaks_7
chr1	6525368	6526453	FGSC_Peaks_8
chr1	6611565	6612699	FGSC_Peaks_9
chr1	6904843	6905915	FGSC_Peaks_10
chr1	8053007	8053842	FGSC_Peaks_11
chr1	8497415	8498823	FGSC_Peaks_12
chr1	9570796	9572113	FGSC_Peaks_13
chr1	9738403	9739616	FGSC_Peaks_14
chr1	9965532	9966579	FGSC_Peaks_15
chr1	10057970	10059156	FGSC_Peaks_16
chr1	10362123	10363201	FGSC_Peaks_17
chr1	12083287	12084449	FGSC_Peaks_18
chr1	15608309	15609297	FGSC_Peaks_19
chr1	15629423	15630344	FGSC_Peaks_20
chr1	18145148	18146268	FGSC_Peaks_21
chr1	19349593	19350717	FGSC_Peaks_22
chr1	19571824	19572970	FGSC_Peaks_23
chr1	20958906	20959982	FGSC_Peaks_24
chr1	22664885	22666300	FGSC_Peaks_25
chr1	23001579	23002748	FGSC_Peaks_26
chr1	23045135	23046244	FGSC_Peaks_27
chr1	23242484	23243507	FGSC_Peaks_28
chr1	23992811	23993749	FGSC_Peaks_29
chr1	24291612	24292877	FGSC_Peaks_30
chr1	24513125	24514301	FGSC_Peaks_31
chr1	25286899	25288028	FGSC_Peaks_32
chr1	25770181	25771261	FGSC_Peaks_33
chr1	26261360	26262543	FGSC_Peaks_34
chr1	26825256	26826215	FGSC_Peaks_35
chr1	27218820	27220223	FGSC_Peaks_36
chr1	27532511	27533644	FGSC_Peaks_37
chr1	27657039	27658270	FGSC_Peaks_38
chr1	28129890	28131078	FGSC_Peaks_39
chr1	28335297	28336317	FGSC_Peaks_40
chr1	29046851	29048015	FGSC_Peaks_41
chr1	29458331	29459285	FGSC_Peaks_42
chr1	29830277	29831371	FGSC_Peaks_43
chr1	29998782	29999791	FGSC_Peaks_44
chr1	30784544	30785455	FGSC_Peaks_45
chr1	32299008	32300197	FGSC_Peaks_46
chr1	32536229	32537604	FGSC_Peaks_47
chr1	32604166	32605221	FGSC_Peaks_48
chr1	32901068	32902454	FGSC_Peaks_49
chr1	33210987	33212055	FGSC_Peaks_50
chr1	33265302	33266442	FGSC_Peaks_51
chr1	33885897	33887062	FGSC_Peaks_52
chr1	34046120	34047257	FGSC_Peaks_53
chr1	34057848	34059105	FGSC_Peaks_54
chr1	34069196	34070520	FGSC_Peaks_55
chr1	34244605	34245870	FGSC_Peaks_56
chr1	36308190	36309428	FGSC_Peaks_57
chr1	36349664	36350842	FGSC_Peaks_58
chr1	36430864	36432030	FGSC_Peaks_59
chr1	38111193	38112483	FGSC_Peaks_60
chr1	39275325	39276402	FGSC_Peaks_61
chr1	39641227	39642167	FGSC_Peaks_62
chr1	39889926	39891259	FGSC_Peaks_63
chr1	39911294	39912404	FGSC_Peaks_64
chr1	40654905	40656014	FGSC_Peaks_65
chr1	40763693	40764748	FGSC_Peaks_66
chr1	40781647	40782788	FGSC_Peaks_67
chr1	41122527	41124009	FGSC_Peaks_68
chr1	42881481	42882655	FGSC_Peaks_69
chr1	42916892	42917969	FGSC_Peaks_70
chr1	43825214	43826388	FGSC_Peaks_71
chr1	43921358	43922606	FGSC_Peaks_72
chr1	44115669	44116821	FGSC_Peaks_73
chr1	44264330	44265356	FGSC_Peaks_74
chr1	44745175	44746322	FGSC_Peaks_75
chr1	45209079	45210245	FGSC_Peaks_76
chr1	45683859	45685032	FGSC_Peaks_77
chr1	47456570	47457624	FGSC_Peaks_78
chr1	47733170	47734149	FGSC_Peaks_79
chr1	48004957	48006084	FGSC_Peaks_80
chr1	48177793	48178796	FGSC_Peaks_81
chr1	48222269	48223440	FGSC_Peaks_82
chr1	49162118	49163303	FGSC_Peaks_83
chr1	49187246	49188422	FGSC_Peaks_84
chr1	49511037	49512232	FGSC_Peaks_85
chr1	49557732	49558734	FGSC_Peaks_86
chr1	49764952	49766008	FGSC_Peaks_87
chr1	50157037	50158315	FGSC_Peaks_88
chr1	50276905	50277825	FGSC_Peaks_89
chr1	50293101	50294253	FGSC_Peaks_90
chr1	50825016	50826058	FGSC_Peaks_91
chr1	50833946	50835124	FGSC_Peaks_92
chr1	51387738	51388511	FGSC_Peaks_93
chr1	51472831	51473532	FGSC_Peaks_94
chr1	51871646	51872597	FGSC_Peaks_95
chr1	51939427	51940366	FGSC_Peaks_96
chr1	52182895	52183985	FGSC_Peaks_97
chr1	52535180	52536228	FGSC_Peaks_98
chr1	52635853	52637044	FGSC_Peaks_99
chr1	53028830	53030017	FGSC_Peaks_100
chr1	53105391	53106415	FGSC_Peaks_101
chr1	53539101	53540299	FGSC_Peaks_102
chr1	53711599	53713025	FGSC_Peaks_103
chr1	53771008	53772180	FGSC_Peaks_104
chr1	53789224	53790325	FGSC_Peaks_105
chr1	53794273	53795246	FGSC_Peaks_106
chr1	54097947	54099166	FGSC_Peaks_107
chr1	54171476	54172501	FGSC_Peaks_108
chr1	54553105	54553974	FGSC_Peaks_109
chr1	54715772	54716868	FGSC_Peaks_110
chr1	54923780	54924941	FGSC_Peaks_111
chr1	55006332	55007495	FGSC_Peaks_112
chr1	55055900	55056852	FGSC_Peaks_113
chr1	56127507	56128957	FGSC_Peaks_114
chr1	56143543	56144578	FGSC_Peaks_115
chr1	56341413	56342536	FGSC_Peaks_116
chr1	57556884	57557840	FGSC_Peaks_117
chr1	58588213	58589397	FGSC_Peaks_118
chr1	58609683	58610715	FGSC_Peaks_119
chr1	58807909	58808739	FGSC_Peaks_120
chr1	59066401	59067564	FGSC_Peaks_121
chr1	59700674	59701480	FGSC_Peaks_122
chr1	59707779	59708737	FGSC_Peaks_123
chr1	59751172	59752338	FGSC_Peaks_124
chr1	59765682	59766623	FGSC_Peaks_125
chr1	59855705	59856821	FGSC_Peaks_126
chr1	60022564	60023746	FGSC_Peaks_127
chr1	60285996	60287304	FGSC_Peaks_128
chr1	60335903	60337035	FGSC_Peaks_129
chr1	60561448	60562677	FGSC_Peaks_130
chr1	60979723	60980906	FGSC_Peaks_131
chr1	61372143	61373189	FGSC_Peaks_132
chr1	61736810	61738113	FGSC_Peaks_133
chr1	62291570	62293003	FGSC_Peaks_134
chr1	62860732	62861877	FGSC_Peaks_135
chr1	63068000	63069582	FGSC_Peaks_136
chr1	63378462	63379413	FGSC_Peaks_137
chr1	63501151	63502477	FGSC_Peaks_138
chr1	63570093	63571031	FGSC_Peaks_139
chr1	63766641	63767516	FGSC_Peaks_140
chr1	64591629	64592782	FGSC_Peaks_141
chr1	64821108	64821876	FGSC_Peaks_142
chr1	64955163	64956674	FGSC_Peaks_143
chr1	65071019	65072180	FGSC_Peaks_144
chr1	65184690	65185666	FGSC_Peaks_145
chr1	65331098	65332263	FGSC_Peaks_146
chr1	66437717	66438914	FGSC_Peaks_147
chr1	66724524	66725706	FGSC_Peaks_148
chr1	66732462	66733275	FGSC_Peaks_149
chr1	66961222	66962157	FGSC_Peaks_150
chr1	67331510	67332446	FGSC_Peaks_151
chr1	67428884	67429915	FGSC_Peaks_152
chr1	68250713	68251817	FGSC_Peaks_153
chr1	68511727	68512853	FGSC_Peaks_154
chr1	68912332	68913527	FGSC_Peaks_155
chr1	69066954	69068348	FGSC_Peaks_156
chr1	69090180	69091517	FGSC_Peaks_157
chr1	69556959	69558070	FGSC_Peaks_158
chr1	69979365	69980544	FGSC_Peaks_159
chr1	70227078	70228415	FGSC_Peaks_160
chr1	70762954	70763763	FGSC_Peaks_161
chr1	70800015	70800923	FGSC_Peaks_162
chr1	71046016	71047084	FGSC_Peaks_163
chr1	71322176	71323292	FGSC_Peaks_164
chr1	71389451	71390363	FGSC_Peaks_165
chr1	71632350	71633310	FGSC_Peaks_166
chr1	71724561	71726065	FGSC_Peaks_167
chr1	71829104	71830233	FGSC_Peaks_168
chr1	71911796	71912991	FGSC_Peaks_169
chr1	72080289	72081096	FGSC_Peaks_170
chr1	72634484	72635786	FGSC_Peaks_171
chr1	72981895	72982853	FGSC_Peaks_172
chr1	74143876	74144999	FGSC_Peaks_173
chr1	74236333	74237758	FGSC_Peaks_174
chr1	74247813	74248765	FGSC_Peaks_175
chr1	74585734	74586918	FGSC_Peaks_176
chr1	74727238	74728414	FGSC_Peaks_177
chr1	74748915	74750132	FGSC_Peaks_178
chr1	75027025	75028161	FGSC_Peaks_179
chr1	75141735	75142881	FGSC_Peaks_180
chr1	75178624	75179811	FGSC_Peaks_181
chr1	75324358	75325272	FGSC_Peaks_182
chr1	75616784	75617588	FGSC_Peaks_183
chr1	75820755	75821940	FGSC_Peaks_184
chr1	76645276	76646309	FGSC_Peaks_185
chr1	77587314	77588597	FGSC_Peaks_186
chr1	78125529	78126683	FGSC_Peaks_187
chr1	78408874	78409966	FGSC_Peaks_188
chr1	78812081	78812988	FGSC_Peaks_189
chr1	79148369	79149352	FGSC_Peaks_190
chr1	79179028	79180139	FGSC_Peaks_191
chr1	79604225	79605297	FGSC_Peaks_192
chr1	79985087	79986202	FGSC_Peaks_193
chr1	80219023	80219818	FGSC_Peaks_194
chr1	80518876	80519991	FGSC_Peaks_195
chr1	80719698	80720738	FGSC_Peaks_196
chr1	81461215	81462488	FGSC_Peaks_197
chr1	81954573	81955756	FGSC_Peaks_198
chr1	82064884	82065827	FGSC_Peaks_199
chr1	82268869	82270001	FGSC_Peaks_200
chr1	82281766	82282961	FGSC_Peaks_201
chr1	82407987	82408990	FGSC_Peaks_202
chr1	82785389	82786330	FGSC_Peaks_203
chr1	82858123	82859134	FGSC_Peaks_204
chr1	84412655	84413769	FGSC_Peaks_205
chr1	84736319	84737407	FGSC_Peaks_206
chr1	84831507	84832782	FGSC_Peaks_207
chr1	85090386	85091323	FGSC_Peaks_208
chr1	85104422	85105599	FGSC_Peaks_209
chr1	85687774	85688952	FGSC_Peaks_210
chr1	85841772	85842828	FGSC_Peaks_211
chr1	86042806	86043905	FGSC_Peaks_212
chr1	86071235	86072406	FGSC_Peaks_213
chr1	86524249	86525428	FGSC_Peaks_214
chr1	86615527	86616760	FGSC_Peaks_215
chr1	87421945	87422860	FGSC_Peaks_216
chr1	87630481	87631389	FGSC_Peaks_217
chr1	87827400	87828500	FGSC_Peaks_218
chr1	87975745	87976934	FGSC_Peaks_219
chr1	88409107	88410477	FGSC_Peaks_220
chr1	88536130	88537373	FGSC_Peaks_221
chr1	88698927	88700096	FGSC_Peaks_222
chr1	88949487	88950792	FGSC_Peaks_223
chr1	89187133	89188720	FGSC_Peaks_224
chr1	90162867	90164142	FGSC_Peaks_225
chr1	90223695	90224844	FGSC_Peaks_226
chr1	90232361	90233579	FGSC_Peaks_227
chr1	90610074	90611215	FGSC_Peaks_228
chr1	90826390	90827473	FGSC_Peaks_229
chr1	91021676	91022954	FGSC_Peaks_230
chr1	91129233	91130337	FGSC_Peaks_231
chr1	91348946	91349841	FGSC_Peaks_232
chr1	91801275	91802653	FGSC_Peaks_233
chr1	92053383	92054369	FGSC_Peaks_234
chr1	93308559	93309383	FGSC_Peaks_235
chr1	93314541	93315850	FGSC_Peaks_236
chr1	93597096	93598155	FGSC_Peaks_237
chr1	95275846	95276931	FGSC_Peaks_238
chr1	95802052	95803125	FGSC_Peaks_239
chr1	96279776	96280681	FGSC_Peaks_240
chr1	97788262	97789223	FGSC_Peaks_241
chr1	97928521	97929690	FGSC_Peaks_242
chr1	98478097	98479266	FGSC_Peaks_243
chr1	98546991	98548106	FGSC_Peaks_244
chr1	99333484	99334926	FGSC_Peaks_245
chr1	100116589	100117746	FGSC_Peaks_246
chr1	100674477	100675576	FGSC_Peaks_247
chr1	100688512	100689604	FGSC_Peaks_248
chr1	100735465	100736380	FGSC_Peaks_249
chr1	101202348	101203444	FGSC_Peaks_250
chr1	101258473	101259511	FGSC_Peaks_251
chr1	101500611	101501677	FGSC_Peaks_252
chr1	102216929	102218061	FGSC_Peaks_253
chr1	102234484	102235645	FGSC_Peaks_254
chr1	102415245	102416121	FGSC_Peaks_255
chr1	102704545	102705648	FGSC_Peaks_256
chr1	103337309	103338237	FGSC_Peaks_257
chr1	103671550	103672685	FGSC_Peaks_258
chr1	103901451	103902335	FGSC_Peaks_259
chr1	104757918	104759106	FGSC_Peaks_260
chr1	105639464	105640669	FGSC_Peaks_261
chr1	105749119	105750225	FGSC_Peaks_262
chr1	105821028	105822180	FGSC_Peaks_263
chr1	105982204	105983337	FGSC_Peaks_264
chr1	106369971	106371160	FGSC_Peaks_265
chr1	107706390	107707236	FGSC_Peaks_266
chr1	107938370	107939153	FGSC_Peaks_267
chr1	108272951	108273776	FGSC_Peaks_268
chr1	108382262	108383302	FGSC_Peaks_269
chr1	110008591	110009738	FGSC_Peaks_270
chr1	110500852	110501882	FGSC_Peaks_271
chr1	111981309	111982389	FGSC_Peaks_272
chr1	112259307	112260458	FGSC_Peaks_273
chr1	112760800	112761778	FGSC_Peaks_274
chr1	114417529	114418686	FGSC_Peaks_275
chr1	114438030	114439118	FGSC_Peaks_276
chr1	115852166	115853223	FGSC_Peaks_277
chr1	118322523	118323742	FGSC_Peaks_278
chr1	119166900	119167855	FGSC_Peaks_279
chr1	119782027	119783011	FGSC_Peaks_280
chr1	120767171	120768122	FGSC_Peaks_281
chr1	121451218	121452476	FGSC_Peaks_282
chr1	121528802	121529826	FGSC_Peaks_283
chr1	122832026	122833076	FGSC_Peaks_284
chr1	122997117	122998221	FGSC_Peaks_285
chr1	123317840	123318956	FGSC_Peaks_286
chr1	123692418	123693555	FGSC_Peaks_287
chr1	124331436	124332321	FGSC_Peaks_288
chr1	125579351	125581027	FGSC_Peaks_289
chr1	125664199	125665170	FGSC_Peaks_290
chr1	126855121	126856307	FGSC_Peaks_291
chr1	127094856	127096034	FGSC_Peaks_292
chr1	127732174	127733341	FGSC_Peaks_293
chr1	127849833	127850928	FGSC_Peaks_294
chr1	129036970	129038160	FGSC_Peaks_295
chr1	129543844	129545194	FGSC_Peaks_296
chr1	130900173	130900911	FGSC_Peaks_297
chr1	131221793	131222652	FGSC_Peaks_298
chr1	131238400	131239530	FGSC_Peaks_299
chr1	131243010	131243925	FGSC_Peaks_300
chr1	131294871	131296431	FGSC_Peaks_301
chr1	131341589	131342754	FGSC_Peaks_302
chr1	131422638	131423445	FGSC_Peaks_303
chr1	131451439	131452634	FGSC_Peaks_304
chr1	131528793	131529928	FGSC_Peaks_305
chr1	132035650	132037046	FGSC_Peaks_306
chr1	132107973	132109167	FGSC_Peaks_307
chr1	132395620	132396751	FGSC_Peaks_308
chr1	132452599	132453589	FGSC_Peaks_309
chr1	132669264	132670160	FGSC_Peaks_310
chr1	132739193	132740149	FGSC_Peaks_311
chr1	133470001	133470964	FGSC_Peaks_312
chr1	133613159	133614237	FGSC_Peaks_313
chr1	134444383	134445481	FGSC_Peaks_314
chr1	134908159	134909230	FGSC_Peaks_315
chr1	135109597	135110769	FGSC_Peaks_316
chr1	135373761	135375020	FGSC_Peaks_317
chr1	135929817	135931104	FGSC_Peaks_318
chr1	135932147	135933390	FGSC_Peaks_319
chr1	136285631	136286692	FGSC_Peaks_320
chr1	136303736	136304884	FGSC_Peaks_321
chr1	136695429	136696482	FGSC_Peaks_322
chr1	137498637	137499791	FGSC_Peaks_323
chr1	137760594	137761785	FGSC_Peaks_324
chr1	138073069	138074238	FGSC_Peaks_325
chr1	138083590	138084676	FGSC_Peaks_326
chr1	138124501	138125673	FGSC_Peaks_327
chr1	138602919	138603677	FGSC_Peaks_328
chr1	138750025	138750949	FGSC_Peaks_329
chr1	138914581	138915493	FGSC_Peaks_330
chr1	138965936	138967126	FGSC_Peaks_331
chr1	139055393	139056607	FGSC_Peaks_332
chr1	139301616	139302799	FGSC_Peaks_333
chr1	139315692	139316918	FGSC_Peaks_334
chr1	140255764	140257053	FGSC_Peaks_335
chr1	140446468	140447520	FGSC_Peaks_336
chr1	141183697	141185540	FGSC_Peaks_337
chr1	141468304	141469456	FGSC_Peaks_338
chr1	141525141	141526235	FGSC_Peaks_339
chr1	141854560	141855383	FGSC_Peaks_340
chr1	142072614	142073489	FGSC_Peaks_341
chr1	142091935	142093127	FGSC_Peaks_342
chr1	142162797	142163697	FGSC_Peaks_343
chr1	142932668	142933899	FGSC_Peaks_344
chr1	143521839	143523178	FGSC_Peaks_345
chr1	143775040	143776212	FGSC_Peaks_346
chr1	143945876	143947117	FGSC_Peaks_347
chr1	144191011	144192113	FGSC_Peaks_348
chr1	144239945	144241106	FGSC_Peaks_349
chr1	144748501	144749480	FGSC_Peaks_350
chr1	144826694	144827541	FGSC_Peaks_351
chr1	144922156	144923282	FGSC_Peaks_352
chr1	145035396	145036534	FGSC_Peaks_353
chr1	145278631	145279819	FGSC_Peaks_354
chr1	145596284	145597441	FGSC_Peaks_355
chr1	145830653	145831980	FGSC_Peaks_356
chr1	146344854	146345822	FGSC_Peaks_357
chr1	146658390	146659527	FGSC_Peaks_358
chr1	146707171	146708354	FGSC_Peaks_359
chr1	146722441	146723619	FGSC_Peaks_360
chr1	146915205	146916851	FGSC_Peaks_361
chr1	147894275	147895319	FGSC_Peaks_362
chr1	148145763	148146950	FGSC_Peaks_363
chr1	148320650	148321829	FGSC_Peaks_364
chr1	148375430	148376597	FGSC_Peaks_365
chr1	149558461	149559429	FGSC_Peaks_366
chr1	149887266	149888548	FGSC_Peaks_367
chr1	150134083	150135368	FGSC_Peaks_368
chr1	150224897	150226027	FGSC_Peaks_369
chr1	150260868	150262231	FGSC_Peaks_370
chr1	150779551	150780763	FGSC_Peaks_371
chr1	151084107	151085109	FGSC_Peaks_372
chr1	151112937	151114018	FGSC_Peaks_373
chr1	151688406	151689419	FGSC_Peaks_374
chr1	152036925	152037945	FGSC_Peaks_375
chr1	152214523	152215535	FGSC_Peaks_376
chr1	152499799	152500765	FGSC_Peaks_377
chr1	152682095	152683273	FGSC_Peaks_378
chr1	152863590	152864785	FGSC_Peaks_379
chr1	152977797	152978967	FGSC_Peaks_380
chr1	153790987	153792157	FGSC_Peaks_381
chr1	153953208	153954323	FGSC_Peaks_382
chr1	154264899	154265972	FGSC_Peaks_383
chr1	154451207	154451878	FGSC_Peaks_384
chr1	155076385	155077324	FGSC_Peaks_385
chr1	155331123	155332242	FGSC_Peaks_386
chr1	155430041	155430905	FGSC_Peaks_387
chr1	155472915	155473675	FGSC_Peaks_388
chr1	155926693	155927738	FGSC_Peaks_389
chr1	156201097	156202227	FGSC_Peaks_390
chr1	156640639	156641645	FGSC_Peaks_391
chr1	156737953	156738786	FGSC_Peaks_392
chr1	156959145	156960075	FGSC_Peaks_393
chr1	156984948	156985859	FGSC_Peaks_394
chr1	157386784	157387966	FGSC_Peaks_395
chr1	157634077	157635288	FGSC_Peaks_396
chr1	157864100	157865119	FGSC_Peaks_397
chr1	157918528	157919548	FGSC_Peaks_398
chr1	158614519	158615678	FGSC_Peaks_399
chr1	158757900	158758918	FGSC_Peaks_400
chr1	159105774	159106968	FGSC_Peaks_401
chr1	159332930	159333885	FGSC_Peaks_402
chr1	159352857	159354186	FGSC_Peaks_403
chr1	159693098	159694243	FGSC_Peaks_404
chr1	160015462	160016698	FGSC_Peaks_405
chr1	160150600	160151652	FGSC_Peaks_406
chr1	160165693	160166751	FGSC_Peaks_407
chr1	160266832	160267894	FGSC_Peaks_408
chr1	160399220	160400767	FGSC_Peaks_409
chr1	160525222	160526408	FGSC_Peaks_410
chr1	160545225	160546276	FGSC_Peaks_411
chr1	160546770	160547571	FGSC_Peaks_412
chr1	160552801	160553555	FGSC_Peaks_413
chr1	160558130	160559267	FGSC_Peaks_414
chr1	160723159	160724234	FGSC_Peaks_415
chr1	160743451	160744362	FGSC_Peaks_416
chr1	160826590	160827726	FGSC_Peaks_417
chr1	160925243	160926316	FGSC_Peaks_418
chr1	160950634	160951807	FGSC_Peaks_419
chr1	161225372	161226458	FGSC_Peaks_420
chr1	161497619	161498896	FGSC_Peaks_421
chr1	161726502	161727283	FGSC_Peaks_422
chr1	162187254	162188619	FGSC_Peaks_423
chr1	162375704	162376632	FGSC_Peaks_424
chr1	162482588	162484001	FGSC_Peaks_425
chr1	162687569	162688773	FGSC_Peaks_426
chr1	162762602	162763785	FGSC_Peaks_427
chr1	163008495	163009584	FGSC_Peaks_428
chr1	163076304	163077244	FGSC_Peaks_429
chr1	163121070	163122147	FGSC_Peaks_430
chr1	163624931	163625978	FGSC_Peaks_431
chr1	163859994	163861101	FGSC_Peaks_432
chr1	164180447	164181599	FGSC_Peaks_433
chr1	164352235	164353216	FGSC_Peaks_434
chr1	164555326	164556451	FGSC_Peaks_435
chr1	164759880	164760885	FGSC_Peaks_436
chr1	164997657	164998781	FGSC_Peaks_437
chr1	165218512	165219875	FGSC_Peaks_438
chr1	165232840	165234063	FGSC_Peaks_439
chr1	165354762	165355731	FGSC_Peaks_440
chr1	165777522	165778617	FGSC_Peaks_441
chr1	165932023	165932985	FGSC_Peaks_442
chr1	166687793	166688639	FGSC_Peaks_443
chr1	167138111	167139296	FGSC_Peaks_444
chr1	167221353	167222635	FGSC_Peaks_445
chr1	167308824	167309981	FGSC_Peaks_446
chr1	168428404	168429703	FGSC_Peaks_447
chr1	168793473	168794478	FGSC_Peaks_448
chr1	168800207	168801329	FGSC_Peaks_449
chr1	169269158	169270307	FGSC_Peaks_450
chr1	169355653	169356814	FGSC_Peaks_451
chr1	169415020	169416188	FGSC_Peaks_452
chr1	170364966	170366103	FGSC_Peaks_453
chr1	171033557	171034635	FGSC_Peaks_454
chr1	171609361	171610436	FGSC_Peaks_455
chr1	172184285	172185485	FGSC_Peaks_456
chr1	172198571	172199539	FGSC_Peaks_457
chr1	173187580	173188762	FGSC_Peaks_458
chr1	173537358	173538483	FGSC_Peaks_459
chr1	173971749	173972828	FGSC_Peaks_460
chr1	173976206	173977710	FGSC_Peaks_461
chr1	174454904	174455955	FGSC_Peaks_462
chr1	176099669	176100634	FGSC_Peaks_463
chr1	176787032	176788657	FGSC_Peaks_464
chr1	176961993	176963127	FGSC_Peaks_465
chr1	177130880	177131955	FGSC_Peaks_466
chr1	177241830	177243143	FGSC_Peaks_467
chr1	177564353	177565113	FGSC_Peaks_468
chr1	177780072	177781110	FGSC_Peaks_469
chr1	177789505	177790735	FGSC_Peaks_470
chr1	178110052	178111321	FGSC_Peaks_471
chr1	178193163	178194572	FGSC_Peaks_472
chr1	178244578	178246008	FGSC_Peaks_473
chr1	178928589	178929742	FGSC_Peaks_474
chr1	179521525	179522400	FGSC_Peaks_475
chr1	179672961	179674049	FGSC_Peaks_476
chr1	179997062	179998079	FGSC_Peaks_477
chr1	180002502	180003692	FGSC_Peaks_478
chr1	180312377	180313226	FGSC_Peaks_479
chr1	181143023	181144204	FGSC_Peaks_480
chr1	181208781	181210040	FGSC_Peaks_481
chr1	181533594	181534858	FGSC_Peaks_482
chr1	181710994	181712248	FGSC_Peaks_483
chr1	181826999	181828096	FGSC_Peaks_484
chr1	181931691	181932942	FGSC_Peaks_485
chr1	182434717	182435888	FGSC_Peaks_486
chr1	182539436	182540375	FGSC_Peaks_487
chr1	182657047	182658189	FGSC_Peaks_488
chr1	183858147	183859061	FGSC_Peaks_489
chr1	183902334	183903474	FGSC_Peaks_490
chr1	183929270	183930228	FGSC_Peaks_491
chr1	183930817	183931726	FGSC_Peaks_492
chr1	184406794	184407658	FGSC_Peaks_493
chr1	185395100	185396348	FGSC_Peaks_494
chr1	187201785	187202987	FGSC_Peaks_495
chr1	187325141	187326451	FGSC_Peaks_496
chr1	187550057	187550871	FGSC_Peaks_497
chr1	188304884	188306235	FGSC_Peaks_498
chr1	189188836	189189973	FGSC_Peaks_499
chr1	189209799	189210830	FGSC_Peaks_500
chr1	190442248	190443532	FGSC_Peaks_501
chr1	191665344	191666365	FGSC_Peaks_502
chr1	191673236	191674320	FGSC_Peaks_503
chr1	191742117	191743178	FGSC_Peaks_504
chr1	192125669	192126898	FGSC_Peaks_505
chr1	192407606	192408366	FGSC_Peaks_506
chr1	192595738	192596794	FGSC_Peaks_507
chr1	193634002	193635163	FGSC_Peaks_508
chr1	193882171	193883578	FGSC_Peaks_509
chr1	194685813	194686794	FGSC_Peaks_510
chr1	194795863	194796974	FGSC_Peaks_511
chr1	195166349	195167398	FGSC_Peaks_512
chr1	195221861	195222825	FGSC_Peaks_513
chr10	3988381	3989529	FGSC_Peaks_514
chr10	4471076	4472243	FGSC_Peaks_515
chr10	5357254	5358561	FGSC_Peaks_516
chr10	5600002	5600841	FGSC_Peaks_517
chr10	11282868	11284024	FGSC_Peaks_518
chr10	11646925	11647991	FGSC_Peaks_519
chr10	12430323	12431187	FGSC_Peaks_520
chr10	12802347	12803461	FGSC_Peaks_521
chr10	15958190	15959164	FGSC_Peaks_522
chr10	17104564	17105741	FGSC_Peaks_523
chr10	17981612	17982795	FGSC_Peaks_524
chr10	18987506	18988638	FGSC_Peaks_525
chr10	19203585	19204759	FGSC_Peaks_526
chr10	21328280	21329434	FGSC_Peaks_527
chr10	21517446	21518558	FGSC_Peaks_528
chr10	22280750	22281914	FGSC_Peaks_529
chr10	22298800	22300203	FGSC_Peaks_530
chr10	26846382	26847438	FGSC_Peaks_531
chr10	27592076	27593063	FGSC_Peaks_532
chr10	27709551	27710707	FGSC_Peaks_533
chr10	29260898	29261845	FGSC_Peaks_534
chr10	31559137	31560306	FGSC_Peaks_535
chr10	34830264	34831356	FGSC_Peaks_536
chr10	39269819	39270824	FGSC_Peaks_537
chr10	39741019	39742198	FGSC_Peaks_538
chr10	40370878	40371822	FGSC_Peaks_539
chr10	40408728	40409771	FGSC_Peaks_540
chr10	44291733	44292864	FGSC_Peaks_541
chr10	45172640	45173628	FGSC_Peaks_542
chr10	48063544	48064735	FGSC_Peaks_543
chr10	48357965	48359184	FGSC_Peaks_544
chr10	49169838	49170794	FGSC_Peaks_545
chr10	52143585	52144768	FGSC_Peaks_546
chr10	53614770	53616319	FGSC_Peaks_547
chr10	54718916	54719840	FGSC_Peaks_548
chr10	54918183	54919164	FGSC_Peaks_549
chr10	55147042	55148125	FGSC_Peaks_550
chr10	58339673	58340841	FGSC_Peaks_551
chr10	58700959	58702087	FGSC_Peaks_552
chr10	60191556	60193161	FGSC_Peaks_553
chr10	60539930	60541022	FGSC_Peaks_554
chr10	61198088	61199271	FGSC_Peaks_555
chr10	61508767	61509763	FGSC_Peaks_556
chr10	63570746	63571831	FGSC_Peaks_557
chr10	65227790	65229116	FGSC_Peaks_558
chr10	65504336	65505242	FGSC_Peaks_559
chr10	66256352	66257368	FGSC_Peaks_560
chr10	67718812	67719895	FGSC_Peaks_561
chr10	68575020	68575894	FGSC_Peaks_562
chr10	68592618	68593534	FGSC_Peaks_563
chr10	72296218	72297572	FGSC_Peaks_564
chr10	72314016	72315094	FGSC_Peaks_565
chr10	72643345	72644624	FGSC_Peaks_566
chr10	72746297	72747319	FGSC_Peaks_567
chr10	73683071	73684238	FGSC_Peaks_568
chr10	73980271	73981596	FGSC_Peaks_569
chr10	74193777	74195186	FGSC_Peaks_570
chr10	74449409	74450369	FGSC_Peaks_571
chr10	74811067	74811930	FGSC_Peaks_572
chr10	74814737	74816137	FGSC_Peaks_573
chr10	75355631	75356840	FGSC_Peaks_574
chr10	75616685	75618147	FGSC_Peaks_575
chr10	75860442	75861374	FGSC_Peaks_576
chr10	75880753	75882072	FGSC_Peaks_577
chr10	76382574	76383601	FGSC_Peaks_578
chr10	76668684	76669870	FGSC_Peaks_579
chr10	76950523	76951524	FGSC_Peaks_580
chr10	77915749	77916733	FGSC_Peaks_581
chr10	78026829	78028459	FGSC_Peaks_582
chr10	78643190	78644851	FGSC_Peaks_583
chr10	78693292	78694350	FGSC_Peaks_584
chr10	79154779	79155708	FGSC_Peaks_585
chr10	79188561	79190053	FGSC_Peaks_586
chr10	79476544	79477680	FGSC_Peaks_587
chr10	80051761	80052923	FGSC_Peaks_588
chr10	80177736	80179106	FGSC_Peaks_589
chr10	80227600	80229059	FGSC_Peaks_590
chr10	80349406	80350544	FGSC_Peaks_591
chr10	80532831	80534123	FGSC_Peaks_592
chr10	80657033	80658178	FGSC_Peaks_593
chr10	80880779	80881845	FGSC_Peaks_594
chr10	81322840	81324006	FGSC_Peaks_595
chr10	81395824	81396986	FGSC_Peaks_596
chr10	81517327	81519256	FGSC_Peaks_597
chr10	82176474	82177851	FGSC_Peaks_598
chr10	82336185	82337102	FGSC_Peaks_599
chr10	82480737	82481754	FGSC_Peaks_600
chr10	82809657	82810494	FGSC_Peaks_601
chr10	82851499	82852462	FGSC_Peaks_602
chr10	82857096	82858242	FGSC_Peaks_603
chr10	82984128	82985290	FGSC_Peaks_604
chr10	83223651	83224623	FGSC_Peaks_605
chr10	83245304	83246491	FGSC_Peaks_606
chr10	83573059	83574366	FGSC_Peaks_607
chr10	84138804	84140130	FGSC_Peaks_608
chr10	85000787	85001879	FGSC_Peaks_609
chr10	85198881	85199859	FGSC_Peaks_610
chr10	85954072	85955092	FGSC_Peaks_611
chr10	86206219	86207460	FGSC_Peaks_612
chr10	86448515	86449597	FGSC_Peaks_613
chr10	86690707	86691822	FGSC_Peaks_614
chr10	86709428	86710514	FGSC_Peaks_615
chr10	86941040	86942329	FGSC_Peaks_616
chr10	87679444	87681042	FGSC_Peaks_617
chr10	88025771	88026799	FGSC_Peaks_618
chr10	89229320	89230209	FGSC_Peaks_619
chr10	89403403	89404409	FGSC_Peaks_620
chr10	89531817	89533327	FGSC_Peaks_621
chr10	89674565	89675638	FGSC_Peaks_622
chr10	89688664	89690030	FGSC_Peaks_623
chr10	89765399	89766365	FGSC_Peaks_624
chr10	90079598	90080660	FGSC_Peaks_625
chr10	90150859	90151991	FGSC_Peaks_626
chr10	90439323	90440416	FGSC_Peaks_627
chr10	91014799	91015595	FGSC_Peaks_628
chr10	91016247	91017575	FGSC_Peaks_629
chr10	91093362	91094242	FGSC_Peaks_630
chr10	91097698	91098888	FGSC_Peaks_631
chr10	91120242	91121097	FGSC_Peaks_632
chr10	91236584	91237497	FGSC_Peaks_633
chr10	91811132	91812278	FGSC_Peaks_634
chr10	92697636	92698853	FGSC_Peaks_635
chr10	92870624	92871753	FGSC_Peaks_636
chr10	93132334	93133523	FGSC_Peaks_637
chr10	93288579	93290171	FGSC_Peaks_638
chr10	93352670	93353837	FGSC_Peaks_639
chr10	93800239	93801342	FGSC_Peaks_640
chr10	93963753	93965183	FGSC_Peaks_641
chr10	94769143	94770232	FGSC_Peaks_642
chr10	95634949	95636200	FGSC_Peaks_643
chr10	95636671	95637661	FGSC_Peaks_644
chr10	95707376	95708512	FGSC_Peaks_645
chr10	95722859	95723929	FGSC_Peaks_646
chr10	95849324	95850206	FGSC_Peaks_647
chr10	95884035	95885033	FGSC_Peaks_648
chr10	95944703	95945851	FGSC_Peaks_649
chr10	95947894	95949162	FGSC_Peaks_650
chr10	95994410	95995582	FGSC_Peaks_651
chr10	95998685	95999632	FGSC_Peaks_652
chr10	96498089	96499284	FGSC_Peaks_653
chr10	96701896	96702926	FGSC_Peaks_654
chr10	96775521	96776735	FGSC_Peaks_655
chr10	96796536	96797551	FGSC_Peaks_656
chr10	96832458	96833251	FGSC_Peaks_657
chr10	97392073	97393144	FGSC_Peaks_658
chr10	97681604	97682899	FGSC_Peaks_659
chr10	97727716	97728942	FGSC_Peaks_660
chr10	98088422	98089350	FGSC_Peaks_661
chr10	98291013	98292044	FGSC_Peaks_662
chr10	98381465	98382654	FGSC_Peaks_663
chr10	100262909	100264232	FGSC_Peaks_664
chr10	100569235	100570270	FGSC_Peaks_665
chr10	103818867	103819930	FGSC_Peaks_666
chr10	103830022	103830993	FGSC_Peaks_667
chr10	104044593	104045432	FGSC_Peaks_668
chr10	104400741	104401849	FGSC_Peaks_669
chr10	104593875	104595149	FGSC_Peaks_670
chr10	105104661	105105857	FGSC_Peaks_671
chr10	106372046	106372922	FGSC_Peaks_672
chr10	107607987	107609496	FGSC_Peaks_673
chr10	107657378	107658827	FGSC_Peaks_674
chr10	107754217	107754958	FGSC_Peaks_675
chr10	108753295	108754350	FGSC_Peaks_676
chr10	109135823	109137002	FGSC_Peaks_677
chr10	109644320	109645528	FGSC_Peaks_678
chr10	109895316	109896450	FGSC_Peaks_679
chr10	109977471	109978676	FGSC_Peaks_680
chr10	110100155	110101244	FGSC_Peaks_681
chr10	111265384	111266926	FGSC_Peaks_682
chr10	111970986	111972228	FGSC_Peaks_683
chr10	111984745	111985953	FGSC_Peaks_684
chr10	112274775	112276097	FGSC_Peaks_685
chr10	112320237	112321535	FGSC_Peaks_686
chr10	112454388	112455622	FGSC_Peaks_687
chr10	112666576	112667845	FGSC_Peaks_688
chr10	112846690	112847562	FGSC_Peaks_689
chr10	112874376	112875552	FGSC_Peaks_690
chr10	113204220	113205389	FGSC_Peaks_691
chr10	113289733	113290819	FGSC_Peaks_692
chr10	113891827	113893095	FGSC_Peaks_693
chr10	113970151	113970994	FGSC_Peaks_694
chr10	114024815	114026409	FGSC_Peaks_695
chr10	114040490	114041674	FGSC_Peaks_696
chr10	114209243	114210167	FGSC_Peaks_697
chr10	114552195	114553628	FGSC_Peaks_698
chr10	114725096	114726424	FGSC_Peaks_699
chr10	114891992	114893567	FGSC_Peaks_700
chr10	115636438	115637592	FGSC_Peaks_701
chr10	115843654	115844599	FGSC_Peaks_702
chr10	115869634	115870788	FGSC_Peaks_703
chr10	116466428	116467423	FGSC_Peaks_704
chr10	116557079	116558043	FGSC_Peaks_705
chr10	116678202	116679056	FGSC_Peaks_706
chr10	116681365	116682390	FGSC_Peaks_707
chr10	116786472	116787698	FGSC_Peaks_708
chr10	117331673	117332948	FGSC_Peaks_709
chr10	117721072	117722083	FGSC_Peaks_710
chr10	118047182	118048501	FGSC_Peaks_711
chr10	118435615	118436411	FGSC_Peaks_712
chr10	118756310	118757188	FGSC_Peaks_713
chr10	118885608	118886581	FGSC_Peaks_714
chr10	118997518	118998384	FGSC_Peaks_715
chr10	119248271	119249303	FGSC_Peaks_716
chr10	119294365	119295428	FGSC_Peaks_717
chr10	119309080	119310147	FGSC_Peaks_718
chr10	119507016	119508519	FGSC_Peaks_719
chr10	119623745	119624733	FGSC_Peaks_720
chr10	119734566	119735419	FGSC_Peaks_721
chr10	119773384	119774536	FGSC_Peaks_722
chr10	120023268	120024383	FGSC_Peaks_723
chr10	120059164	120060267	FGSC_Peaks_724
chr10	120207252	120208368	FGSC_Peaks_725
chr10	120311487	120313398	FGSC_Peaks_726
chr10	120338141	120339335	FGSC_Peaks_727
chr10	120463748	120464521	FGSC_Peaks_728
chr10	120589902	120590888	FGSC_Peaks_729
chr10	120645196	120646027	FGSC_Peaks_730
chr10	120882187	120883245	FGSC_Peaks_731
chr10	120909704	120910661	FGSC_Peaks_732
chr10	120938043	120939215	FGSC_Peaks_733
chr10	121086256	121087498	FGSC_Peaks_734
chr10	121371035	121372104	FGSC_Peaks_735
chr10	121535663	121536518	FGSC_Peaks_736
chr10	122333571	122334916	FGSC_Peaks_737
chr10	122404783	122405806	FGSC_Peaks_738
chr10	123510258	123511310	FGSC_Peaks_739
chr10	123814027	123814636	FGSC_Peaks_740
chr10	124163984	124165176	FGSC_Peaks_741
chr10	124886028	124887226	FGSC_Peaks_742
chr10	124963484	124964655	FGSC_Peaks_743
chr10	125762654	125763949	FGSC_Peaks_744
chr10	126111205	126112599	FGSC_Peaks_745
chr10	126292553	126293863	FGSC_Peaks_746
chr10	126440889	126442050	FGSC_Peaks_747
chr10	126468664	126469739	FGSC_Peaks_748
chr10	126681197	126682575	FGSC_Peaks_749
chr10	128079962	128081356	FGSC_Peaks_750
chr10	128083597	128084761	FGSC_Peaks_751
chr10	128085149	128086121	FGSC_Peaks_752
chr10	128335185	128336122	FGSC_Peaks_753
chr10	128560034	128561808	FGSC_Peaks_754
chr10	128777573	128778777	FGSC_Peaks_755
chr10	128789114	128789984	FGSC_Peaks_756
chr10	128840109	128841239	FGSC_Peaks_757
chr10	128899739	128900669	FGSC_Peaks_758
chr10	129160872	129161936	FGSC_Peaks_759
chr10	129469832	129470967	FGSC_Peaks_760
chr10	129693827	129694724	FGSC_Peaks_761
chr10	129746847	129747796	FGSC_Peaks_762
chr10	129793641	129794748	FGSC_Peaks_763
chr10	129860543	129862025	FGSC_Peaks_764
chr10	130004939	130006011	FGSC_Peaks_765
chr10	130264258	130265359	FGSC_Peaks_766
chr10	130314317	130315502	FGSC_Peaks_767
chr11	3778819	3780122	FGSC_Peaks_768
chr11	4332648	4333634	FGSC_Peaks_769
chr11	4506268	4507379	FGSC_Peaks_770
chr11	4561836	4563087	FGSC_Peaks_771
chr11	4612906	4614215	FGSC_Peaks_772
chr11	4621945	4623003	FGSC_Peaks_773
chr11	4984305	4985585	FGSC_Peaks_774
chr11	5081799	5082750	FGSC_Peaks_775
chr11	5436269	5437402	FGSC_Peaks_776
chr11	5574108	5575242	FGSC_Peaks_777
chr11	6421791	6423234	FGSC_Peaks_778
chr11	6473123	6474429	FGSC_Peaks_779
chr11	6479647	6480584	FGSC_Peaks_780
chr11	6555197	6556274	FGSC_Peaks_781
chr11	7274973	7275944	FGSC_Peaks_782
chr11	7498959	7500030	FGSC_Peaks_783
chr11	8301636	8302471	FGSC_Peaks_784
chr11	9241399	9242452	FGSC_Peaks_785
chr11	9355102	9356287	FGSC_Peaks_786
chr11	9859914	9861182	FGSC_Peaks_787
chr11	12408506	12409685	FGSC_Peaks_788
chr11	12708055	12708799	FGSC_Peaks_789
chr11	12841141	12842290	FGSC_Peaks_790
chr11	13025813	13026862	FGSC_Peaks_791
chr11	13175126	13176112	FGSC_Peaks_792
chr11	14413876	14415009	FGSC_Peaks_793
chr11	14533874	14534858	FGSC_Peaks_794
chr11	15335690	15336731	FGSC_Peaks_795
chr11	16707078	16708338	FGSC_Peaks_796
chr11	17384921	17386538	FGSC_Peaks_797
chr11	17705323	17706028	FGSC_Peaks_798
chr11	18278576	18279520	FGSC_Peaks_799
chr11	18398612	18399637	FGSC_Peaks_800
chr11	18631754	18632742	FGSC_Peaks_801
chr11	18943208	18944312	FGSC_Peaks_802
chr11	20222782	20223732	FGSC_Peaks_803
chr11	20370198	20371444	FGSC_Peaks_804
chr11	20703040	20704081	FGSC_Peaks_805
chr11	20861609	20862699	FGSC_Peaks_806
chr11	21122554	21123782	FGSC_Peaks_807
chr11	21312778	21314068	FGSC_Peaks_808
chr11	21317945	21319060	FGSC_Peaks_809
chr11	21572374	21573418	FGSC_Peaks_810
chr11	21595016	21595830	FGSC_Peaks_811
chr11	21918941	21919613	FGSC_Peaks_812
chr11	22173400	22174473	FGSC_Peaks_813
chr11	22514931	22516009	FGSC_Peaks_814
chr11	22657797	22658779	FGSC_Peaks_815
chr11	22669730	22671245	FGSC_Peaks_816
chr11	22934041	22935159	FGSC_Peaks_817
chr11	23332473	23333768	FGSC_Peaks_818
chr11	23345658	23347111	FGSC_Peaks_819
chr11	23380594	23381791	FGSC_Peaks_820
chr11	23565314	23566754	FGSC_Peaks_821
chr11	23567519	23568650	FGSC_Peaks_822
chr11	23912120	23913235	FGSC_Peaks_823
chr11	26636133	26637033	FGSC_Peaks_824
chr11	27346104	27347115	FGSC_Peaks_825
chr11	27456156	27457399	FGSC_Peaks_826
chr11	27464906	27466168	FGSC_Peaks_827
chr11	28137916	28139100	FGSC_Peaks_828
chr11	28385723	28386864	FGSC_Peaks_829
chr11	28522090	28523242	FGSC_Peaks_830
chr11	28760693	28761865	FGSC_Peaks_831
chr11	28830275	28831945	FGSC_Peaks_832
chr11	28904034	28905310	FGSC_Peaks_833
chr11	29177581	29178414	FGSC_Peaks_834
chr11	29388919	29390065	FGSC_Peaks_835
chr11	29599756	29601076	FGSC_Peaks_836
chr11	31026698	31027784	FGSC_Peaks_837
chr11	31225923	31227240	FGSC_Peaks_838
chr11	31432046	31432977	FGSC_Peaks_839
chr11	32355926	32357091	FGSC_Peaks_840
chr11	33318215	33319321	FGSC_Peaks_841
chr11	33325947	33327136	FGSC_Peaks_842
chr11	33768046	33769311	FGSC_Peaks_843
chr11	34036972	34038135	FGSC_Peaks_844
chr11	34055299	34056264	FGSC_Peaks_845
chr11	35102140	35103789	FGSC_Peaks_846
chr11	35741061	35742231	FGSC_Peaks_847
chr11	35793777	35794843	FGSC_Peaks_848
chr11	35832685	35833840	FGSC_Peaks_849
chr11	36006709	36007325	FGSC_Peaks_850
chr11	36257141	36257985	FGSC_Peaks_851
chr11	36813854	36815030	FGSC_Peaks_852
chr11	37449537	37450644	FGSC_Peaks_853
chr11	37945416	37946490	FGSC_Peaks_854
chr11	38558593	38559755	FGSC_Peaks_855
chr11	39193264	39194169	FGSC_Peaks_856
chr11	39739584	39740546	FGSC_Peaks_857
chr11	41335304	41336589	FGSC_Peaks_858
chr11	41524532	41525661	FGSC_Peaks_859
chr11	41987403	41988338	FGSC_Peaks_860
chr11	42315328	42316415	FGSC_Peaks_861
chr11	42383297	42384354	FGSC_Peaks_862
chr11	42472351	42473458	FGSC_Peaks_863
chr11	42943355	42944481	FGSC_Peaks_864
chr11	45558254	45559030	FGSC_Peaks_865
chr11	45973218	45974427	FGSC_Peaks_866
chr11	46178123	46179290	FGSC_Peaks_867
chr11	47260230	47261243	FGSC_Peaks_868
chr11	47491199	47492314	FGSC_Peaks_869
chr11	47698299	47699469	FGSC_Peaks_870
chr11	47994916	47996513	FGSC_Peaks_871
chr11	48094061	48095258	FGSC_Peaks_872
chr11	48418682	48419715	FGSC_Peaks_873
chr11	48440780	48442042	FGSC_Peaks_874
chr11	48599599	48600916	FGSC_Peaks_875
chr11	49120358	49121438	FGSC_Peaks_876
chr11	50611310	50612267	FGSC_Peaks_877
chr11	51239151	51240315	FGSC_Peaks_878
chr11	51254845	51255939	FGSC_Peaks_879
chr11	51334979	51336177	FGSC_Peaks_880
chr11	51725449	51727033	FGSC_Peaks_881
chr11	51903238	51904509	FGSC_Peaks_882
chr11	51920439	51921811	FGSC_Peaks_883
chr11	51969103	51970263	FGSC_Peaks_884
chr11	51986115	51987334	FGSC_Peaks_885
chr11	52047966	52049149	FGSC_Peaks_886
chr11	52251910	52253081	FGSC_Peaks_887
chr11	53284980	53286172	FGSC_Peaks_888
chr11	53341142	53341937	FGSC_Peaks_889
chr11	53372689	53373677	FGSC_Peaks_890
chr11	53440470	53441621	FGSC_Peaks_891
chr11	53485167	53486312	FGSC_Peaks_892
chr11	53493053	53493800	FGSC_Peaks_893
chr11	54525012	54526205	FGSC_Peaks_894
chr11	54544533	54545917	FGSC_Peaks_895
chr11	54638595	54639711	FGSC_Peaks_896
chr11	54785410	54786509	FGSC_Peaks_897
chr11	54974656	54975657	FGSC_Peaks_898
chr11	55369690	55370485	FGSC_Peaks_899
chr11	56708524	56709851	FGSC_Peaks_900
chr11	59695536	59696892	FGSC_Peaks_901
chr11	59734166	59735241	FGSC_Peaks_902
chr11	60189024	60190161	FGSC_Peaks_903
chr11	60527132	60528090	FGSC_Peaks_904
chr11	60821874	60823030	FGSC_Peaks_905
chr11	61359905	61360982	FGSC_Peaks_906
chr11	61387752	61388913	FGSC_Peaks_907
chr11	62013652	62014848	FGSC_Peaks_908
chr11	62126222	62127369	FGSC_Peaks_909
chr11	62523999	62525043	FGSC_Peaks_910
chr11	62597245	62598114	FGSC_Peaks_911
chr11	63807982	63808990	FGSC_Peaks_912
chr11	64735833	64736983	FGSC_Peaks_913
chr11	65087289	65088035	FGSC_Peaks_914
chr11	65154722	65155732	FGSC_Peaks_915
chr11	67231192	67232095	FGSC_Peaks_916
chr11	67410981	67411861	FGSC_Peaks_917
chr11	67524861	67525841	FGSC_Peaks_918
chr11	67965513	67966856	FGSC_Peaks_919
chr11	68406995	68408041	FGSC_Peaks_920
chr11	68809431	68810222	FGSC_Peaks_921
chr11	69230114	69231179	FGSC_Peaks_922
chr11	69276608	69277734	FGSC_Peaks_923
chr11	69927206	69928063	FGSC_Peaks_924
chr11	69990974	69992090	FGSC_Peaks_925
chr11	70075202	70076386	FGSC_Peaks_926
chr11	70196665	70197923	FGSC_Peaks_927
chr11	70452496	70453515	FGSC_Peaks_928
chr11	70489231	70490450	FGSC_Peaks_929
chr11	70675186	70676429	FGSC_Peaks_930
chr11	70925654	70926795	FGSC_Peaks_931
chr11	71953779	71954683	FGSC_Peaks_932
chr11	72093235	72094309	FGSC_Peaks_933
chr11	72111150	72111925	FGSC_Peaks_934
chr11	72133299	72134240	FGSC_Peaks_935
chr11	72683394	72684511	FGSC_Peaks_936
chr11	72794287	72795337	FGSC_Peaks_937
chr11	73683003	73684009	FGSC_Peaks_938
chr11	74049171	74050264	FGSC_Peaks_939
chr11	74573391	74574455	FGSC_Peaks_940
chr11	74653354	74654532	FGSC_Peaks_941
chr11	74760498	74761606	FGSC_Peaks_942
chr11	75008153	75009302	FGSC_Peaks_943
chr11	75346202	75346988	FGSC_Peaks_944
chr11	75495095	75496184	FGSC_Peaks_945
chr11	75621160	75622165	FGSC_Peaks_946
chr11	75680401	75681533	FGSC_Peaks_947
chr11	75732620	75733696	FGSC_Peaks_948
chr11	75754571	75755685	FGSC_Peaks_949
chr11	75759686	75760868	FGSC_Peaks_950
chr11	76025943	76026817	FGSC_Peaks_951
chr11	76640036	76641104	FGSC_Peaks_952
chr11	76890910	76891927	FGSC_Peaks_953
chr11	77179254	77180209	FGSC_Peaks_954
chr11	77281164	77282258	FGSC_Peaks_955
chr11	77409221	77410277	FGSC_Peaks_956
chr11	77673463	77674405	FGSC_Peaks_957
chr11	77691142	77692346	FGSC_Peaks_958
chr11	77827843	77828994	FGSC_Peaks_959
chr11	78509912	78510956	FGSC_Peaks_960
chr11	78841368	78842455	FGSC_Peaks_961
chr11	79286741	79287759	FGSC_Peaks_962
chr11	79388839	79390056	FGSC_Peaks_963
chr11	79521570	79522599	FGSC_Peaks_964
chr11	80047475	80048663	FGSC_Peaks_965
chr11	80449959	80450868	FGSC_Peaks_966
chr11	80629827	80630981	FGSC_Peaks_967
chr11	81013496	81014694	FGSC_Peaks_968
chr11	82047384	82048577	FGSC_Peaks_969
chr11	83361285	83362234	FGSC_Peaks_970
chr11	83379586	83380878	FGSC_Peaks_971
chr11	83631808	83633173	FGSC_Peaks_972
chr11	84761420	84762389	FGSC_Peaks_973
chr11	84840721	84841945	FGSC_Peaks_974
chr11	85037371	85038405	FGSC_Peaks_975
chr11	85082027	85083225	FGSC_Peaks_976
chr11	85459227	85460345	FGSC_Peaks_977
chr11	85680575	85681706	FGSC_Peaks_978
chr11	85747367	85748416	FGSC_Peaks_979
chr11	86071586	86072615	FGSC_Peaks_980
chr11	86089103	86090025	FGSC_Peaks_981
chr11	86111228	86112341	FGSC_Peaks_982
chr11	86211222	86212413	FGSC_Peaks_983
chr11	86228893	86230017	FGSC_Peaks_984
chr11	86267377	86268260	FGSC_Peaks_985
chr11	86415430	86416563	FGSC_Peaks_986
chr11	86507829	86508582	FGSC_Peaks_987
chr11	86622959	86623941	FGSC_Peaks_988
chr11	86624169	86625248	FGSC_Peaks_989
chr11	86671425	86672618	FGSC_Peaks_990
chr11	86679812	86681320	FGSC_Peaks_991
chr11	86733199	86734186	FGSC_Peaks_992
chr11	86771826	86772870	FGSC_Peaks_993
chr11	87011882	87013213	FGSC_Peaks_994
chr11	87149135	87150703	FGSC_Peaks_995
chr11	87616524	87617617	FGSC_Peaks_996
chr11	87925871	87927486	FGSC_Peaks_997
chr11	88050464	88051295	FGSC_Peaks_998
chr11	88557823	88558963	FGSC_Peaks_999
chr11	89187617	89188612	FGSC_Peaks_1000
chr11	89366061	89367192	FGSC_Peaks_1001
chr11	90276459	90277642	FGSC_Peaks_1002
chr11	90323379	90324351	FGSC_Peaks_1003
chr11	90471770	90472961	FGSC_Peaks_1004
chr11	90587380	90588575	FGSC_Peaks_1005
chr11	90590343	90591243	FGSC_Peaks_1006
chr11	90604098	90605174	FGSC_Peaks_1007
chr11	90610676	90611794	FGSC_Peaks_1008
chr11	90654111	90655213	FGSC_Peaks_1009
chr11	90710317	90711274	FGSC_Peaks_1010
chr11	90714221	90715385	FGSC_Peaks_1011
chr11	90742967	90744048	FGSC_Peaks_1012
chr11	90856263	90857449	FGSC_Peaks_1013
chr11	90863076	90864499	FGSC_Peaks_1014
chr11	90871236	90872413	FGSC_Peaks_1015
chr11	91042407	91043877	FGSC_Peaks_1016
chr11	91218852	91220048	FGSC_Peaks_1017
chr11	91337269	91338335	FGSC_Peaks_1018
chr11	91520827	91521824	FGSC_Peaks_1019
chr11	91589411	91590628	FGSC_Peaks_1020
chr11	91892682	91894217	FGSC_Peaks_1021
chr11	91962998	91964256	FGSC_Peaks_1022
chr11	92030039	92031122	FGSC_Peaks_1023
chr11	92264832	92265776	FGSC_Peaks_1024
chr11	92349765	92350554	FGSC_Peaks_1025
chr11	92356101	92357263	FGSC_Peaks_1026
chr11	92663311	92664458	FGSC_Peaks_1027
chr11	93004812	93006060	FGSC_Peaks_1028
chr11	93065595	93066723	FGSC_Peaks_1029
chr11	93295399	93296372	FGSC_Peaks_1030
chr11	93477551	93478745	FGSC_Peaks_1031
chr11	93645043	93646202	FGSC_Peaks_1032
chr11	93766686	93768084	FGSC_Peaks_1033
chr11	93944024	93945391	FGSC_Peaks_1034
chr11	93951036	93952214	FGSC_Peaks_1035
chr11	93952469	93953866	FGSC_Peaks_1036
chr11	93997055	93997964	FGSC_Peaks_1037
chr11	94038851	94039977	FGSC_Peaks_1038
chr11	94078624	94079809	FGSC_Peaks_1039
chr11	94123453	94124544	FGSC_Peaks_1040
chr11	94322481	94323920	FGSC_Peaks_1041
chr11	94348792	94349641	FGSC_Peaks_1042
chr11	94907993	94909318	FGSC_Peaks_1043
chr11	94917299	94918324	FGSC_Peaks_1044
chr11	95077397	95078512	FGSC_Peaks_1045
chr11	95082985	95084040	FGSC_Peaks_1046
chr11	95155847	95157061	FGSC_Peaks_1047
chr11	95250872	95251828	FGSC_Peaks_1048
chr11	95282777	95284198	FGSC_Peaks_1049
chr11	95306668	95308172	FGSC_Peaks_1050
chr11	95388574	95389610	FGSC_Peaks_1051
chr11	95395264	95396216	FGSC_Peaks_1052
chr11	95431410	95432865	FGSC_Peaks_1053
chr11	95809979	95811123	FGSC_Peaks_1054
chr11	95826750	95827715	FGSC_Peaks_1055
chr11	96093727	96094728	FGSC_Peaks_1056
chr11	96549946	96551061	FGSC_Peaks_1057
chr11	96778114	96779363	FGSC_Peaks_1058
chr11	96860080	96860938	FGSC_Peaks_1059
chr11	97071364	97072553	FGSC_Peaks_1060
chr11	97258601	97259645	FGSC_Peaks_1061
chr11	97269850	97271260	FGSC_Peaks_1062
chr11	97399652	97401046	FGSC_Peaks_1063
chr11	97422799	97423920	FGSC_Peaks_1064
chr11	97448929	97450051	FGSC_Peaks_1065
chr11	97600754	97602268	FGSC_Peaks_1066
chr11	97662492	97663574	FGSC_Peaks_1067
chr11	97700862	97701664	FGSC_Peaks_1068
chr11	97781583	97782742	FGSC_Peaks_1069
chr11	97791806	97793283	FGSC_Peaks_1070
chr11	97851912	97852906	FGSC_Peaks_1071
chr11	97861832	97862811	FGSC_Peaks_1072
chr11	97896321	97897447	FGSC_Peaks_1073
chr11	97987174	97988224	FGSC_Peaks_1074
chr11	98034133	98035243	FGSC_Peaks_1075
chr11	98091568	98092903	FGSC_Peaks_1076
chr11	98252182	98253512	FGSC_Peaks_1077
chr11	98296185	98297465	FGSC_Peaks_1078
chr11	98403658	98404853	FGSC_Peaks_1079
chr11	98930256	98931440	FGSC_Peaks_1080
chr11	99020295	99021493	FGSC_Peaks_1081
chr11	99263130	99264242	FGSC_Peaks_1082
chr11	99420471	99421622	FGSC_Peaks_1083
chr11	99475872	99477148	FGSC_Peaks_1084
chr11	99506405	99507592	FGSC_Peaks_1085
chr11	99583720	99584707	FGSC_Peaks_1086
chr11	99670951	99672111	FGSC_Peaks_1087
chr11	99856948	99858245	FGSC_Peaks_1088
chr11	99920006	99921111	FGSC_Peaks_1089
chr11	100075747	100076554	FGSC_Peaks_1090
chr11	100161540	100162631	FGSC_Peaks_1091
chr11	100521491	100522756	FGSC_Peaks_1092
chr11	100541160	100542377	FGSC_Peaks_1093
chr11	100549103	100549989	FGSC_Peaks_1094
chr11	100730083	100731114	FGSC_Peaks_1095
chr11	100818664	100819547	FGSC_Peaks_1096
chr11	100857243	100858345	FGSC_Peaks_1097
chr11	100866519	100867676	FGSC_Peaks_1098
chr11	100913190	100914168	FGSC_Peaks_1099
chr11	100917013	100918108	FGSC_Peaks_1100
chr11	100923585	100924714	FGSC_Peaks_1101
chr11	100941388	100942475	FGSC_Peaks_1102
chr11	101056886	101057996	FGSC_Peaks_1103
chr11	101069394	101070331	FGSC_Peaks_1104
chr11	101151252	101152275	FGSC_Peaks_1105
chr11	101275697	101276685	FGSC_Peaks_1106
chr11	101581784	101582897	FGSC_Peaks_1107
chr11	101682249	101683589	FGSC_Peaks_1108
chr11	101765060	101766460	FGSC_Peaks_1109
chr11	101864884	101865869	FGSC_Peaks_1110
chr11	101974868	101976096	FGSC_Peaks_1111
chr11	102230631	102231681	FGSC_Peaks_1112
chr11	102358222	102359310	FGSC_Peaks_1113
chr11	102378828	102380437	FGSC_Peaks_1114
chr11	102575235	102576455	FGSC_Peaks_1115
chr11	102798744	102800251	FGSC_Peaks_1116
chr11	102819854	102820991	FGSC_Peaks_1117
chr11	102925872	102927138	FGSC_Peaks_1118
chr11	103007632	103008714	FGSC_Peaks_1119
chr11	103028865	103030002	FGSC_Peaks_1120
chr11	103241486	103242628	FGSC_Peaks_1121
chr11	103268037	103269247	FGSC_Peaks_1122
chr11	103381887	103383002	FGSC_Peaks_1123
chr11	103417589	103418719	FGSC_Peaks_1124
chr11	103683014	103684197	FGSC_Peaks_1125
chr11	103829282	103830998	FGSC_Peaks_1126
chr11	103882826	103883968	FGSC_Peaks_1127
chr11	103910934	103912088	FGSC_Peaks_1128
chr11	103931907	103933494	FGSC_Peaks_1129
chr11	103975653	103976739	FGSC_Peaks_1130
chr11	104001398	104002471	FGSC_Peaks_1131
chr11	104290447	104291532	FGSC_Peaks_1132
chr11	104323215	104324080	FGSC_Peaks_1133
chr11	104333932	104335075	FGSC_Peaks_1134
chr11	104359181	104360206	FGSC_Peaks_1135
chr11	104369861	104370957	FGSC_Peaks_1136
chr11	104431350	104432436	FGSC_Peaks_1137
chr11	104453670	104454637	FGSC_Peaks_1138
chr11	104539169	104540271	FGSC_Peaks_1139
chr11	104560913	104561942	FGSC_Peaks_1140
chr11	104610583	104611377	FGSC_Peaks_1141
chr11	104700941	104702278	FGSC_Peaks_1142
chr11	104770954	104772083	FGSC_Peaks_1143
chr11	104804765	104805944	FGSC_Peaks_1144
chr11	104876891	104878153	FGSC_Peaks_1145
chr11	105218516	105219724	FGSC_Peaks_1146
chr11	105219788	105220968	FGSC_Peaks_1147
chr11	105238487	105239651	FGSC_Peaks_1148
chr11	105274897	105276096	FGSC_Peaks_1149
chr11	105347439	105348696	FGSC_Peaks_1150
chr11	105473184	105474411	FGSC_Peaks_1151
chr11	105555554	105556708	FGSC_Peaks_1152
chr11	105579465	105580730	FGSC_Peaks_1153
chr11	105616312	105617708	FGSC_Peaks_1154
chr11	105733360	105734256	FGSC_Peaks_1155
chr11	105754104	105755029	FGSC_Peaks_1156
chr11	105779866	105780937	FGSC_Peaks_1157
chr11	105794308	105795449	FGSC_Peaks_1158
chr11	105840118	105842503	FGSC_Peaks_1159
chr11	105886801	105887685	FGSC_Peaks_1160
chr11	105899958	105900949	FGSC_Peaks_1161
chr11	106144046	106145769	FGSC_Peaks_1162
chr11	106193712	106194706	FGSC_Peaks_1163
chr11	106207304	106208481	FGSC_Peaks_1164
chr11	106213593	106214401	FGSC_Peaks_1165
chr11	106312257	106313761	FGSC_Peaks_1166
chr11	106352231	106353441	FGSC_Peaks_1167
chr11	106434270	106435726	FGSC_Peaks_1168
chr11	106494113	106495266	FGSC_Peaks_1169
chr11	106502012	106503055	FGSC_Peaks_1170
chr11	106695063	106696239	FGSC_Peaks_1171
chr11	106749145	106750140	FGSC_Peaks_1172
chr11	106764281	106765431	FGSC_Peaks_1173
chr11	106795964	106797297	FGSC_Peaks_1174
chr11	106882189	106883217	FGSC_Peaks_1175
chr11	106897483	106898681	FGSC_Peaks_1176
chr11	106928158	106929877	FGSC_Peaks_1177
chr11	106955854	106956848	FGSC_Peaks_1178
chr11	106965285	106966534	FGSC_Peaks_1179
chr11	107117529	107118516	FGSC_Peaks_1180
chr11	107152536	107153949	FGSC_Peaks_1181
chr11	107181071	107182227	FGSC_Peaks_1182
chr11	107481007	107482134	FGSC_Peaks_1183
chr11	107495764	107496957	FGSC_Peaks_1184
chr11	107592836	107594976	FGSC_Peaks_1185
chr11	107681400	107682587	FGSC_Peaks_1186
chr11	108091662	108092804	FGSC_Peaks_1187
chr11	108112116	108112838	FGSC_Peaks_1188
chr11	108194057	108195090	FGSC_Peaks_1189
chr11	108270610	108271582	FGSC_Peaks_1190
chr11	108302988	108304123	FGSC_Peaks_1191
chr11	108413670	108414794	FGSC_Peaks_1192
chr11	108450533	108451705	FGSC_Peaks_1193
chr11	108458483	108459683	FGSC_Peaks_1194
chr11	108529702	108530921	FGSC_Peaks_1195
chr11	109011451	109012404	FGSC_Peaks_1196
chr11	109247614	109248360	FGSC_Peaks_1197
chr11	109388397	109389528	FGSC_Peaks_1198
chr11	109628410	109629462	FGSC_Peaks_1199
chr11	109664360	109665729	FGSC_Peaks_1200
chr11	109904415	109905369	FGSC_Peaks_1201
chr11	110027582	110028436	FGSC_Peaks_1202
chr11	110107294	110108362	FGSC_Peaks_1203
chr11	110135591	110136684	FGSC_Peaks_1204
chr11	110163868	110165214	FGSC_Peaks_1205
chr11	110276233	110277030	FGSC_Peaks_1206
chr11	110409625	110411039	FGSC_Peaks_1207
chr11	110561820	110563151	FGSC_Peaks_1208
chr11	110621958	110623410	FGSC_Peaks_1209
chr11	110817897	110819123	FGSC_Peaks_1210
chr11	110866436	110867960	FGSC_Peaks_1211
chr11	110914674	110915836	FGSC_Peaks_1212
chr11	110961648	110962918	FGSC_Peaks_1213
chr11	111166866	111167809	FGSC_Peaks_1214
chr11	111345118	111346206	FGSC_Peaks_1215
chr11	111372572	111373933	FGSC_Peaks_1216
chr11	111544444	111545641	FGSC_Peaks_1217
chr11	112545839	112547021	FGSC_Peaks_1218
chr11	112993479	112994726	FGSC_Peaks_1219
chr11	113052599	113053415	FGSC_Peaks_1220
chr11	113193415	113194766	FGSC_Peaks_1221
chr11	113444887	113445805	FGSC_Peaks_1222
chr11	113537879	113539029	FGSC_Peaks_1223
chr11	114148374	114149115	FGSC_Peaks_1224
chr11	115090555	115091685	FGSC_Peaks_1225
chr11	115290854	115292036	FGSC_Peaks_1226
chr11	115330666	115331513	FGSC_Peaks_1227
chr11	115459220	115460369	FGSC_Peaks_1228
chr11	115550042	115551351	FGSC_Peaks_1229
chr11	115593308	115594292	FGSC_Peaks_1230
chr11	115837366	115838623	FGSC_Peaks_1231
chr11	116097079	116098228	FGSC_Peaks_1232
chr11	116136572	116137624	FGSC_Peaks_1233
chr11	116137801	116138850	FGSC_Peaks_1234
chr11	116164391	116165555	FGSC_Peaks_1235
chr11	116166466	116167763	FGSC_Peaks_1236
chr11	116169830	116171009	FGSC_Peaks_1237
chr11	116626017	116627056	FGSC_Peaks_1238
chr11	116636071	116637208	FGSC_Peaks_1239
chr11	116779890	116781069	FGSC_Peaks_1240
chr11	116868579	116869529	FGSC_Peaks_1241
chr11	117011093	117012103	FGSC_Peaks_1242
chr11	117231736	117233076	FGSC_Peaks_1243
chr11	117681327	117682617	FGSC_Peaks_1244
chr11	117989603	117990574	FGSC_Peaks_1245
chr11	118351431	118352456	FGSC_Peaks_1246
chr11	118742641	118743824	FGSC_Peaks_1247
chr11	119020388	119021583	FGSC_Peaks_1248
chr11	119065485	119066644	FGSC_Peaks_1249
chr11	119082157	119083134	FGSC_Peaks_1250
chr11	119215677	119216844	FGSC_Peaks_1251
chr11	119316486	119317554	FGSC_Peaks_1252
chr11	119523412	119524654	FGSC_Peaks_1253
chr11	119688277	119689917	FGSC_Peaks_1254
chr11	119729627	119730789	FGSC_Peaks_1255
chr11	120202472	120203522	FGSC_Peaks_1256
chr11	120437820	120439103	FGSC_Peaks_1257
chr11	121015100	121016154	FGSC_Peaks_1258
chr11	121135010	121136457	FGSC_Peaks_1259
chr11	121447132	121448323	FGSC_Peaks_1260
chr11	121584904	121585978	FGSC_Peaks_1261
chr12	3240890	3242326	FGSC_Peaks_1262
chr12	3303945	3305141	FGSC_Peaks_1263
chr12	3422248	3423313	FGSC_Peaks_1264
chr12	3479052	3480403	FGSC_Peaks_1265
chr12	3601761	3602890	FGSC_Peaks_1266
chr12	4147064	4148066	FGSC_Peaks_1267
chr12	4167712	4169067	FGSC_Peaks_1268
chr12	4206399	4207587	FGSC_Peaks_1269
chr12	4282157	4283157	FGSC_Peaks_1270
chr12	4612583	4613752	FGSC_Peaks_1271
chr12	4645531	4646740	FGSC_Peaks_1272
chr12	4725743	4726809	FGSC_Peaks_1273
chr12	4766776	4767977	FGSC_Peaks_1274
chr12	4944545	4945930	FGSC_Peaks_1275
chr12	5028848	5030191	FGSC_Peaks_1276
chr12	5043055	5044432	FGSC_Peaks_1277
chr12	5355997	5357226	FGSC_Peaks_1278
chr12	5706432	5707592	FGSC_Peaks_1279
chr12	6114394	6115588	FGSC_Peaks_1280
chr12	6218143	6219102	FGSC_Peaks_1281
chr12	6439919	6441003	FGSC_Peaks_1282
chr12	7689078	7690124	FGSC_Peaks_1283
chr12	7925999	7927152	FGSC_Peaks_1284
chr12	8731627	8733081	FGSC_Peaks_1285
chr12	8752335	8753450	FGSC_Peaks_1286
chr12	9232929	9234095	FGSC_Peaks_1287
chr12	10430421	10431565	FGSC_Peaks_1288
chr12	11071296	11072421	FGSC_Peaks_1289
chr12	12558603	12559954	FGSC_Peaks_1290
chr12	12869405	12870531	FGSC_Peaks_1291
chr12	13278845	13280080	FGSC_Peaks_1292
chr12	13686301	13687287	FGSC_Peaks_1293
chr12	14272263	14273281	FGSC_Peaks_1294
chr12	14334566	14335744	FGSC_Peaks_1295
chr12	14649281	14650442	FGSC_Peaks_1296
chr12	14985157	14986341	FGSC_Peaks_1297
chr12	15040984	15042177	FGSC_Peaks_1298
chr12	15077736	15079239	FGSC_Peaks_1299
chr12	15339298	15340345	FGSC_Peaks_1300
chr12	15538261	15539729	FGSC_Peaks_1301
chr12	16343817	16344973	FGSC_Peaks_1302
chr12	16750996	16751876	FGSC_Peaks_1303
chr12	16807690	16808747	FGSC_Peaks_1304
chr12	16951713	16952834	FGSC_Peaks_1305
chr12	16979259	16979964	FGSC_Peaks_1306
chr12	17249149	17250458	FGSC_Peaks_1307
chr12	17777568	17778647	FGSC_Peaks_1308
chr12	18266112	18266853	FGSC_Peaks_1309
chr12	21370315	21371173	FGSC_Peaks_1310
chr12	24516602	24517399	FGSC_Peaks_1311
chr12	24741970	24743099	FGSC_Peaks_1312
chr12	25030249	25031292	FGSC_Peaks_1313
chr12	25095447	25096233	FGSC_Peaks_1314
chr12	25303754	25304922	FGSC_Peaks_1315
chr12	28513948	28514912	FGSC_Peaks_1316
chr12	29783110	29784219	FGSC_Peaks_1317
chr12	30408893	30410269	FGSC_Peaks_1318
chr12	30565615	30566670	FGSC_Peaks_1319
chr12	30717110	30718234	FGSC_Peaks_1320
chr12	31133099	31134269	FGSC_Peaks_1321
chr12	31282054	31283159	FGSC_Peaks_1322
chr12	31507205	31508548	FGSC_Peaks_1323
chr12	31689853	31691066	FGSC_Peaks_1324
chr12	31756373	31757562	FGSC_Peaks_1325
chr12	31789527	31790705	FGSC_Peaks_1326
chr12	32097704	32098627	FGSC_Peaks_1327
chr12	33374326	33375254	FGSC_Peaks_1328
chr12	33380133	33380811	FGSC_Peaks_1329
chr12	33460712	33462038	FGSC_Peaks_1330
chr12	33957620	33958984	FGSC_Peaks_1331
chr12	34098407	34099492	FGSC_Peaks_1332
chr12	34164169	34165356	FGSC_Peaks_1333
chr12	34187155	34188423	FGSC_Peaks_1334
chr12	34435523	34436846	FGSC_Peaks_1335
chr12	34492718	34493905	FGSC_Peaks_1336
chr12	34572690	34574132	FGSC_Peaks_1337
chr12	34782180	34783406	FGSC_Peaks_1338
chr12	35055399	35056604	FGSC_Peaks_1339
chr12	35305548	35306690	FGSC_Peaks_1340
chr12	35417785	35418927	FGSC_Peaks_1341
chr12	35542338	35544136	FGSC_Peaks_1342
chr12	35675790	35677066	FGSC_Peaks_1343
chr12	35790456	35791491	FGSC_Peaks_1344
chr12	35997825	35998471	FGSC_Peaks_1345
chr12	36399115	36400286	FGSC_Peaks_1346
chr12	36566616	36567668	FGSC_Peaks_1347
chr12	37608649	37609647	FGSC_Peaks_1348
chr12	37745744	37746896	FGSC_Peaks_1349
chr12	37927021	37928277	FGSC_Peaks_1350
chr12	37975885	37977102	FGSC_Peaks_1351
chr12	38537900	38539011	FGSC_Peaks_1352
chr12	38694621	38695682	FGSC_Peaks_1353
chr12	38941954	38943562	FGSC_Peaks_1354
chr12	39674084	39675051	FGSC_Peaks_1355
chr12	39679121	39680415	FGSC_Peaks_1356
chr12	39723104	39724299	FGSC_Peaks_1357
chr12	39878635	39879877	FGSC_Peaks_1358
chr12	39952310	39953116	FGSC_Peaks_1359
chr12	40060172	40061240	FGSC_Peaks_1360
chr12	40222328	40223759	FGSC_Peaks_1361
chr12	40251764	40252803	FGSC_Peaks_1362
chr12	40588665	40589661	FGSC_Peaks_1363
chr12	40657284	40658351	FGSC_Peaks_1364
chr12	40948424	40949506	FGSC_Peaks_1365
chr12	41924614	41925946	FGSC_Peaks_1366
chr12	42121977	42123290	FGSC_Peaks_1367
chr12	42416628	42417626	FGSC_Peaks_1368
chr12	42553757	42554741	FGSC_Peaks_1369
chr12	43114943	43115759	FGSC_Peaks_1370
chr12	43276685	43277846	FGSC_Peaks_1371
chr12	43444455	43445772	FGSC_Peaks_1372
chr12	43642759	43644120	FGSC_Peaks_1373
chr12	43771637	43772468	FGSC_Peaks_1374
chr12	43896216	43897405	FGSC_Peaks_1375
chr12	44059267	44060458	FGSC_Peaks_1376
chr12	44523367	44524606	FGSC_Peaks_1377
chr12	44814302	44815407	FGSC_Peaks_1378
chr12	44998996	45000178	FGSC_Peaks_1379
chr12	47841158	47842393	FGSC_Peaks_1380
chr12	47874703	47875886	FGSC_Peaks_1381
chr12	49949126	49950115	FGSC_Peaks_1382
chr12	50313690	50314816	FGSC_Peaks_1383
chr12	50356840	50357968	FGSC_Peaks_1384
chr12	50359515	50360501	FGSC_Peaks_1385
chr12	50471187	50472275	FGSC_Peaks_1386
chr12	50527812	50528997	FGSC_Peaks_1387
chr12	50803809	50805138	FGSC_Peaks_1388
chr12	51007941	51009017	FGSC_Peaks_1389
chr12	51373386	51374508	FGSC_Peaks_1390
chr12	51694628	51695647	FGSC_Peaks_1391
chr12	51834306	51835269	FGSC_Peaks_1392
chr12	52345555	52346303	FGSC_Peaks_1393
chr12	52350867	52352134	FGSC_Peaks_1394
chr12	52783540	52784670	FGSC_Peaks_1395
chr12	53651958	53653034	FGSC_Peaks_1396
chr12	53876606	53877782	FGSC_Peaks_1397
chr12	53953832	53954795	FGSC_Peaks_1398
chr12	54207345	54208481	FGSC_Peaks_1399
chr12	54361759	54362992	FGSC_Peaks_1400
chr12	54424520	54425544	FGSC_Peaks_1401
chr12	54919759	54920580	FGSC_Peaks_1402
chr12	55463246	55465094	FGSC_Peaks_1403
chr12	55669760	55671635	FGSC_Peaks_1404
chr12	55689269	55690264	FGSC_Peaks_1405
chr12	55722022	55723114	FGSC_Peaks_1406
chr12	56082913	56084089	FGSC_Peaks_1407
chr12	56288040	56289036	FGSC_Peaks_1408
chr12	56915957	56916922	FGSC_Peaks_1409
chr12	57011657	57012506	FGSC_Peaks_1410
chr12	57289829	57290920	FGSC_Peaks_1411
chr12	57867161	57868317	FGSC_Peaks_1412
chr12	57995539	57996806	FGSC_Peaks_1413
chr12	58963717	58965426	FGSC_Peaks_1414
chr12	59158124	59159107	FGSC_Peaks_1415
chr12	59237151	59238293	FGSC_Peaks_1416
chr12	59409297	59410418	FGSC_Peaks_1417
chr12	59413273	59414798	FGSC_Peaks_1418
chr12	59978054	59979358	FGSC_Peaks_1419
chr12	59982825	59983941	FGSC_Peaks_1420
chr12	60016691	60017834	FGSC_Peaks_1421
chr12	60182835	60183905	FGSC_Peaks_1422
chr12	60801241	60802759	FGSC_Peaks_1423
chr12	60943381	60944542	FGSC_Peaks_1424
chr12	60951934	60953034	FGSC_Peaks_1425
chr12	61326694	61327647	FGSC_Peaks_1426
chr12	61694568	61695772	FGSC_Peaks_1427
chr12	62125220	62126252	FGSC_Peaks_1428
chr12	62588521	62589443	FGSC_Peaks_1429
chr12	63104126	63105272	FGSC_Peaks_1430
chr12	65063661	65065046	FGSC_Peaks_1431
chr12	65086874	65087699	FGSC_Peaks_1432
chr12	65159812	65160863	FGSC_Peaks_1433
chr12	66019524	66020429	FGSC_Peaks_1434
chr12	66097219	66098392	FGSC_Peaks_1435
chr12	66131890	66133144	FGSC_Peaks_1436
chr12	66229619	66230265	FGSC_Peaks_1437
chr12	66941899	66942985	FGSC_Peaks_1438
chr12	67614725	67616313	FGSC_Peaks_1439
chr12	67685620	67686647	FGSC_Peaks_1440
chr12	68218439	68219501	FGSC_Peaks_1441
chr12	68454634	68455985	FGSC_Peaks_1442
chr12	68578006	68579079	FGSC_Peaks_1443
chr12	68759490	68760593	FGSC_Peaks_1444
chr12	68978380	68979517	FGSC_Peaks_1445
chr12	68997778	68998939	FGSC_Peaks_1446
chr12	69155028	69155961	FGSC_Peaks_1447
chr12	69313890	69315083	FGSC_Peaks_1448
chr12	69356785	69358154	FGSC_Peaks_1449
chr12	69372744	69373782	FGSC_Peaks_1450
chr12	69499307	69500443	FGSC_Peaks_1451
chr12	69634179	69635204	FGSC_Peaks_1452
chr12	69762020	69763393	FGSC_Peaks_1453
chr12	69912798	69913871	FGSC_Peaks_1454
chr12	70002051	70003245	FGSC_Peaks_1455
chr12	70208502	70209232	FGSC_Peaks_1456
chr12	70722527	70723588	FGSC_Peaks_1457
chr12	70761775	70763118	FGSC_Peaks_1458
chr12	71137944	71139053	FGSC_Peaks_1459
chr12	71514425	71515520	FGSC_Peaks_1460
chr12	72133140	72134148	FGSC_Peaks_1461
chr12	72474925	72475989	FGSC_Peaks_1462
chr12	73020322	73021233	FGSC_Peaks_1463
chr12	73177178	73178199	FGSC_Peaks_1464
chr12	73316141	73317297	FGSC_Peaks_1465
chr12	73790431	73791804	FGSC_Peaks_1466
chr12	73797125	73798257	FGSC_Peaks_1467
chr12	73845126	73846189	FGSC_Peaks_1468
chr12	73931953	73933100	FGSC_Peaks_1469
chr12	74344883	74345955	FGSC_Peaks_1470
chr12	74750197	74751695	FGSC_Peaks_1471
chr12	74828547	74829510	FGSC_Peaks_1472
chr12	75145935	75147055	FGSC_Peaks_1473
chr12	75271855	75273211	FGSC_Peaks_1474
chr12	75423097	75424080	FGSC_Peaks_1475
chr12	75699567	75700485	FGSC_Peaks_1476
chr12	75796350	75797518	FGSC_Peaks_1477
chr12	75879860	75881149	FGSC_Peaks_1478
chr12	75991967	75993152	FGSC_Peaks_1479
chr12	76388217	76389362	FGSC_Peaks_1480
chr12	76454527	76455687	FGSC_Peaks_1481
chr12	77393915	77394974	FGSC_Peaks_1482
chr12	77465578	77466734	FGSC_Peaks_1483
chr12	77981782	77982826	FGSC_Peaks_1484
chr12	78263234	78264319	FGSC_Peaks_1485
chr12	78362103	78363317	FGSC_Peaks_1486
chr12	78397602	78398358	FGSC_Peaks_1487
chr12	78436637	78437665	FGSC_Peaks_1488
chr12	78456581	78457678	FGSC_Peaks_1489
chr12	79146122	79147096	FGSC_Peaks_1490
chr12	79302305	79303745	FGSC_Peaks_1491
chr12	79357908	79359119	FGSC_Peaks_1492
chr12	79591783	79593434	FGSC_Peaks_1493
chr12	79864465	79865598	FGSC_Peaks_1494
chr12	79971237	79972462	FGSC_Peaks_1495
chr12	80109162	80110539	FGSC_Peaks_1496
chr12	80724644	80725685	FGSC_Peaks_1497
chr12	81322009	81323051	FGSC_Peaks_1498
chr12	81608358	81609417	FGSC_Peaks_1499
chr12	82812906	82814054	FGSC_Peaks_1500
chr12	82939111	82940248	FGSC_Peaks_1501
chr12	83644501	83645956	FGSC_Peaks_1502
chr12	84179736	84180470	FGSC_Peaks_1503
chr12	84222879	84223979	FGSC_Peaks_1504
chr12	84393450	84394596	FGSC_Peaks_1505
chr12	84812022	84813000	FGSC_Peaks_1506
chr12	85053056	85054140	FGSC_Peaks_1507
chr12	85156891	85157829	FGSC_Peaks_1508
chr12	85274247	85275542	FGSC_Peaks_1509
chr12	85797703	85798673	FGSC_Peaks_1510
chr12	85885007	85886089	FGSC_Peaks_1511
chr12	86852205	86853733	FGSC_Peaks_1512
chr12	86877957	86879144	FGSC_Peaks_1513
chr12	87017120	87017896	FGSC_Peaks_1514
chr12	87033951	87035134	FGSC_Peaks_1515
chr12	87569425	87570553	FGSC_Peaks_1516
chr12	88146554	88147274	FGSC_Peaks_1517
chr12	89896335	89897664	FGSC_Peaks_1518
chr12	91192096	91193255	FGSC_Peaks_1519
chr12	92976696	92978019	FGSC_Peaks_1520
chr12	93481188	93482354	FGSC_Peaks_1521
chr12	93601325	93602374	FGSC_Peaks_1522
chr12	94245352	94246190	FGSC_Peaks_1523
chr12	94473061	94474156	FGSC_Peaks_1524
chr12	94566027	94567032	FGSC_Peaks_1525
chr12	94947057	94948165	FGSC_Peaks_1526
chr12	95021611	95022595	FGSC_Peaks_1527
chr12	95167364	95168956	FGSC_Peaks_1528
chr12	95333958	95335104	FGSC_Peaks_1529
chr12	95865694	95866839	FGSC_Peaks_1530
chr12	96143909	96145082	FGSC_Peaks_1531
chr12	96343360	96344534	FGSC_Peaks_1532
chr12	96583245	96584310	FGSC_Peaks_1533
chr12	96585407	96586549	FGSC_Peaks_1534
chr12	96614071	96615259	FGSC_Peaks_1535
chr12	98849186	98850380	FGSC_Peaks_1536
chr12	99171436	99172554	FGSC_Peaks_1537
chr12	99283329	99284459	FGSC_Peaks_1538
chr12	99725961	99727126	FGSC_Peaks_1539
chr12	100234599	100235643	FGSC_Peaks_1540
chr12	100644440	100645515	FGSC_Peaks_1541
chr12	100653338	100654421	FGSC_Peaks_1542
chr12	100699564	100700851	FGSC_Peaks_1543
chr12	101674047	101675136	FGSC_Peaks_1544
chr12	101750433	101751216	FGSC_Peaks_1545
chr12	102434851	102435783	FGSC_Peaks_1546
chr12	102804294	102805410	FGSC_Peaks_1547
chr12	102851857	102853404	FGSC_Peaks_1548
chr12	103534994	103536257	FGSC_Peaks_1549
chr12	104814903	104815777	FGSC_Peaks_1550
chr12	104996119	104997436	FGSC_Peaks_1551
chr12	105544765	105545956	FGSC_Peaks_1552
chr12	105594882	105595860	FGSC_Peaks_1553
chr12	108162091	108163275	FGSC_Peaks_1554
chr12	108815111	108815952	FGSC_Peaks_1555
chr12	109657911	109658946	FGSC_Peaks_1556
chr12	109702367	109703472	FGSC_Peaks_1557
chr12	110386645	110388091	FGSC_Peaks_1558
chr12	110528620	110529768	FGSC_Peaks_1559
chr12	110732219	110733409	FGSC_Peaks_1560
chr12	111101014	111102122	FGSC_Peaks_1561
chr12	111738387	111739413	FGSC_Peaks_1562
chr12	113731849	113733027	FGSC_Peaks_1563
chr12	114457348	114458390	FGSC_Peaks_1564
chr12	114618450	114619167	FGSC_Peaks_1565
chr12	115938345	115939156	FGSC_Peaks_1566
chr12	116422150	116423345	FGSC_Peaks_1567
chr12	118313466	118314886	FGSC_Peaks_1568
chr12	118658744	118659794	FGSC_Peaks_1569
chr12	119824254	119825030	FGSC_Peaks_1570
chr13	3826926	3828006	FGSC_Peaks_1571
chr13	4267106	4268290	FGSC_Peaks_1572
chr13	4610338	4611381	FGSC_Peaks_1573
chr13	4899090	4900186	FGSC_Peaks_1574
chr13	5103939	5105072	FGSC_Peaks_1575
chr13	5361278	5362664	FGSC_Peaks_1576
chr13	5464773	5465966	FGSC_Peaks_1577
chr13	5485584	5486651	FGSC_Peaks_1578
chr13	5613518	5614709	FGSC_Peaks_1579
chr13	6008263	6009453	FGSC_Peaks_1580
chr13	6125809	6126971	FGSC_Peaks_1581
chr13	7265005	7266151	FGSC_Peaks_1582
chr13	7322923	7323987	FGSC_Peaks_1583
chr13	7513830	7514882	FGSC_Peaks_1584
chr13	9148177	9149105	FGSC_Peaks_1585
chr13	9162318	9163419	FGSC_Peaks_1586
chr13	9169675	9170599	FGSC_Peaks_1587
chr13	9492129	9493069	FGSC_Peaks_1588
chr13	9504671	9505841	FGSC_Peaks_1589
chr13	9697494	9698518	FGSC_Peaks_1590
chr13	9760809	9761612	FGSC_Peaks_1591
chr13	10349653	10350730	FGSC_Peaks_1592
chr13	11551995	11553288	FGSC_Peaks_1593
chr13	11816537	11817583	FGSC_Peaks_1594
chr13	13813064	13814023	FGSC_Peaks_1595
chr13	13856536	13857724	FGSC_Peaks_1596
chr13	14333807	14335349	FGSC_Peaks_1597
chr13	15697410	15698477	FGSC_Peaks_1598
chr13	15778382	15779557	FGSC_Peaks_1599
chr13	16589666	16590863	FGSC_Peaks_1600
chr13	16972627	16973679	FGSC_Peaks_1601
chr13	17040479	17041666	FGSC_Peaks_1602
chr13	17482164	17483326	FGSC_Peaks_1603
chr13	17587874	17588957	FGSC_Peaks_1604
chr13	17697166	17698259	FGSC_Peaks_1605
chr13	18443334	18444489	FGSC_Peaks_1606
chr13	18524430	18525445	FGSC_Peaks_1607
chr13	19578437	19579598	FGSC_Peaks_1608
chr13	20042446	20043809	FGSC_Peaks_1609
chr13	20453422	20454336	FGSC_Peaks_1610
chr13	20812298	20813669	FGSC_Peaks_1611
chr13	21287171	21288523	FGSC_Peaks_1612
chr13	21510173	21511274	FGSC_Peaks_1613
chr13	21555937	21557023	FGSC_Peaks_1614
chr13	22012918	22013988	FGSC_Peaks_1615
chr13	22029547	22030985	FGSC_Peaks_1616
chr13	22044881	22046049	FGSC_Peaks_1617
chr13	22347801	22348893	FGSC_Peaks_1618
chr13	23285580	23287015	FGSC_Peaks_1619
chr13	23400213	23402070	FGSC_Peaks_1620
chr13	23499692	23500494	FGSC_Peaks_1621
chr13	23535752	23537052	FGSC_Peaks_1622
chr13	23630185	23631362	FGSC_Peaks_1623
chr13	23830448	23831612	FGSC_Peaks_1624
chr13	24160475	24161494	FGSC_Peaks_1625
chr13	24538365	24539520	FGSC_Peaks_1626
chr13	24541913	24543028	FGSC_Peaks_1627
chr13	24719959	24720903	FGSC_Peaks_1628
chr13	24812315	24813222	FGSC_Peaks_1629
chr13	25426349	25427447	FGSC_Peaks_1630
chr13	26504844	26505898	FGSC_Peaks_1631
chr13	26555939	26557060	FGSC_Peaks_1632
chr13	27112386	27113130	FGSC_Peaks_1633
chr13	27338127	27339286	FGSC_Peaks_1634
chr13	27521281	27522370	FGSC_Peaks_1635
chr13	27555566	27557316	FGSC_Peaks_1636
chr13	27649347	27650723	FGSC_Peaks_1637
chr13	27654868	27655981	FGSC_Peaks_1638
chr13	27674326	27675361	FGSC_Peaks_1639
chr13	28150497	28151935	FGSC_Peaks_1640
chr13	28460022	28461307	FGSC_Peaks_1641
chr13	28714944	28716105	FGSC_Peaks_1642
chr13	28736801	28738000	FGSC_Peaks_1643
chr13	28861553	28862518	FGSC_Peaks_1644
chr13	29276693	29277971	FGSC_Peaks_1645
chr13	29504367	29505761	FGSC_Peaks_1646
chr13	29828918	29829993	FGSC_Peaks_1647
chr13	30148612	30149869	FGSC_Peaks_1648
chr13	31329699	31331079	FGSC_Peaks_1649
chr13	31591146	31592130	FGSC_Peaks_1650
chr13	31900969	31902084	FGSC_Peaks_1651
chr13	31989197	31989979	FGSC_Peaks_1652
chr13	32544604	32545725	FGSC_Peaks_1653
chr13	32558197	32559370	FGSC_Peaks_1654
chr13	32598873	32600084	FGSC_Peaks_1655
chr13	32688036	32689172	FGSC_Peaks_1656
chr13	32728274	32729661	FGSC_Peaks_1657
chr13	33009976	33011196	FGSC_Peaks_1658
chr13	33068136	33069283	FGSC_Peaks_1659
chr13	34005721	34006565	FGSC_Peaks_1660
chr13	34012604	34013622	FGSC_Peaks_1661
chr13	34715188	34716183	FGSC_Peaks_1662
chr13	35417200	35418680	FGSC_Peaks_1663
chr13	36884965	36885893	FGSC_Peaks_1664
chr13	36988874	36989968	FGSC_Peaks_1665
chr13	37649319	37650435	FGSC_Peaks_1666
chr13	37719936	37720737	FGSC_Peaks_1667
chr13	37828130	37828844	FGSC_Peaks_1668
chr13	38481185	38482323	FGSC_Peaks_1669
chr13	38535644	38537540	FGSC_Peaks_1670
chr13	39157923	39159078	FGSC_Peaks_1671
chr13	39256833	39258095	FGSC_Peaks_1672
chr13	39314629	39315488	FGSC_Peaks_1673
chr13	40059845	40061322	FGSC_Peaks_1674
chr13	40201310	40202372	FGSC_Peaks_1675
chr13	41555388	41556294	FGSC_Peaks_1676
chr13	42885292	42886689	FGSC_Peaks_1677
chr13	42919516	42920624	FGSC_Peaks_1678
chr13	42981004	42981863	FGSC_Peaks_1679
chr13	43182720	43183825	FGSC_Peaks_1680
chr13	43284511	43285385	FGSC_Peaks_1681
chr13	43436263	43437314	FGSC_Peaks_1682
chr13	43675223	43676382	FGSC_Peaks_1683
chr13	43709907	43711031	FGSC_Peaks_1684
chr13	45001815	45002921	FGSC_Peaks_1685
chr13	45207857	45209023	FGSC_Peaks_1686
chr13	45599281	45600326	FGSC_Peaks_1687
chr13	46001131	46002325	FGSC_Peaks_1688
chr13	46707073	46708273	FGSC_Peaks_1689
chr13	46767092	46768258	FGSC_Peaks_1690
chr13	47084822	47086255	FGSC_Peaks_1691
chr13	48228494	48229332	FGSC_Peaks_1692
chr13	48263105	48264164	FGSC_Peaks_1693
chr13	48478370	48479771	FGSC_Peaks_1694
chr13	49074085	49075122	FGSC_Peaks_1695
chr13	49126412	49127618	FGSC_Peaks_1696
chr13	49411750	49412682	FGSC_Peaks_1697
chr13	49438970	49440110	FGSC_Peaks_1698
chr13	49481420	49482580	FGSC_Peaks_1699
chr13	49550454	49551708	FGSC_Peaks_1700
chr13	49556113	49557126	FGSC_Peaks_1701
chr13	49623425	49624838	FGSC_Peaks_1702
chr13	49653591	49654787	FGSC_Peaks_1703
chr13	51482996	51484157	FGSC_Peaks_1704
chr13	51892899	51894035	FGSC_Peaks_1705
chr13	52175638	52176589	FGSC_Peaks_1706
chr13	53712549	53713688	FGSC_Peaks_1707
chr13	54083241	54084250	FGSC_Peaks_1708
chr13	55236473	55237424	FGSC_Peaks_1709
chr13	55317199	55318314	FGSC_Peaks_1710
chr13	55728292	55729381	FGSC_Peaks_1711
chr13	56020954	56022291	FGSC_Peaks_1712
chr13	56207234	56207965	FGSC_Peaks_1713
chr13	56661447	56662625	FGSC_Peaks_1714
chr13	56902287	56903569	FGSC_Peaks_1715
chr13	58471049	58472157	FGSC_Peaks_1716
chr13	58474595	58475747	FGSC_Peaks_1717
chr13	58601062	58602198	FGSC_Peaks_1718
chr13	59978280	59979833	FGSC_Peaks_1719
chr13	61030172	61031304	FGSC_Peaks_1720
chr13	62365333	62366405	FGSC_Peaks_1721
chr13	63568267	63569449	FGSC_Peaks_1722
chr13	63817822	63819154	FGSC_Peaks_1723
chr13	64132905	64133995	FGSC_Peaks_1724
chr13	64349734	64350938	FGSC_Peaks_1725
chr13	64421211	64422268	FGSC_Peaks_1726
chr13	65304229	65305290	FGSC_Peaks_1727
chr13	68876334	68877399	FGSC_Peaks_1728
chr13	70298147	70299287	FGSC_Peaks_1729
chr13	71056632	71057899	FGSC_Peaks_1730
chr13	71654139	71655214	FGSC_Peaks_1731
chr13	72094943	72096300	FGSC_Peaks_1732
chr13	73512426	73513602	FGSC_Peaks_1733
chr13	74283795	74284991	FGSC_Peaks_1734
chr13	74667561	74668680	FGSC_Peaks_1735
chr13	74819187	74820321	FGSC_Peaks_1736
chr13	74863239	74864577	FGSC_Peaks_1737
chr13	74990983	74992043	FGSC_Peaks_1738
chr13	75226888	75228144	FGSC_Peaks_1739
chr13	76545122	76546284	FGSC_Peaks_1740
chr13	76810409	76811646	FGSC_Peaks_1741
chr13	78086188	78087012	FGSC_Peaks_1742
chr13	78555273	78556616	FGSC_Peaks_1743
chr13	78853707	78854591	FGSC_Peaks_1744
chr13	78954580	78955631	FGSC_Peaks_1745
chr13	79243740	79244902	FGSC_Peaks_1746
chr13	79313554	79314836	FGSC_Peaks_1747
chr13	80087456	80088705	FGSC_Peaks_1748
chr13	81475065	81476069	FGSC_Peaks_1749
chr13	81499116	81500277	FGSC_Peaks_1750
chr13	82767912	82769043	FGSC_Peaks_1751
chr13	83382187	83383261	FGSC_Peaks_1752
chr13	83433092	83434260	FGSC_Peaks_1753
chr13	83596487	83597624	FGSC_Peaks_1754
chr13	83604793	83606093	FGSC_Peaks_1755
chr13	83800487	83801658	FGSC_Peaks_1756
chr13	84034422	84035569	FGSC_Peaks_1757
chr13	85357160	85358298	FGSC_Peaks_1758
chr13	85430108	85431144	FGSC_Peaks_1759
chr13	85682925	85684065	FGSC_Peaks_1760
chr13	85866090	85867237	FGSC_Peaks_1761
chr13	86173282	86174701	FGSC_Peaks_1762
chr13	86237173	86238340	FGSC_Peaks_1763
chr13	86602055	86603076	FGSC_Peaks_1764
chr13	86745237	86746585	FGSC_Peaks_1765
chr13	88220585	88221792	FGSC_Peaks_1766
chr13	88225691	88226865	FGSC_Peaks_1767
chr13	88294060	88295179	FGSC_Peaks_1768
chr13	88850945	88851913	FGSC_Peaks_1769
chr13	88871897	88872921	FGSC_Peaks_1770
chr13	88911632	88912606	FGSC_Peaks_1771
chr13	89035641	89036825	FGSC_Peaks_1772
chr13	89582930	89583975	FGSC_Peaks_1773
chr13	89885566	89886707	FGSC_Peaks_1774
chr13	90260717	90261747	FGSC_Peaks_1775
chr13	90478328	90479312	FGSC_Peaks_1776
chr13	90901709	90902902	FGSC_Peaks_1777
chr13	91141290	91142482	FGSC_Peaks_1778
chr13	91896018	91897043	FGSC_Peaks_1779
chr13	92266289	92267676	FGSC_Peaks_1780
chr13	92534791	92535891	FGSC_Peaks_1781
chr13	92692194	92693183	FGSC_Peaks_1782
chr13	93145456	93146578	FGSC_Peaks_1783
chr13	93160558	93162314	FGSC_Peaks_1784
chr13	93405181	93406314	FGSC_Peaks_1785
chr13	93513393	93514831	FGSC_Peaks_1786
chr13	93831736	93832828	FGSC_Peaks_1787
chr13	93906299	93907393	FGSC_Peaks_1788
chr13	93979038	93980204	FGSC_Peaks_1789
chr13	94048461	94049507	FGSC_Peaks_1790
chr13	94283497	94284284	FGSC_Peaks_1791
chr13	94367246	94368321	FGSC_Peaks_1792
chr13	94400597	94401661	FGSC_Peaks_1793
chr13	94507840	94508961	FGSC_Peaks_1794
chr13	95155802	95156723	FGSC_Peaks_1795
chr13	96430884	96431854	FGSC_Peaks_1796
chr13	96456141	96457088	FGSC_Peaks_1797
chr13	96545686	96546776	FGSC_Peaks_1798
chr13	96576288	96577691	FGSC_Peaks_1799
chr13	96784645	96785719	FGSC_Peaks_1800
chr13	97427318	97428505	FGSC_Peaks_1801
chr13	97678839	97679902	FGSC_Peaks_1802
chr13	98767810	98768905	FGSC_Peaks_1803
chr13	98842038	98843591	FGSC_Peaks_1804
chr13	98900270	98901413	FGSC_Peaks_1805
chr13	98957768	98959261	FGSC_Peaks_1806
chr13	99025959	99027135	FGSC_Peaks_1807
chr13	99431467	99432616	FGSC_Peaks_1808
chr13	99585231	99586384	FGSC_Peaks_1809
chr13	99857352	99858526	FGSC_Peaks_1810
chr13	100587708	100588789	FGSC_Peaks_1811
chr13	100762424	100763808	FGSC_Peaks_1812
chr13	101551478	101552497	FGSC_Peaks_1813
chr13	101887122	101888278	FGSC_Peaks_1814
chr13	102290365	102291733	FGSC_Peaks_1815
chr13	102479566	102480676	FGSC_Peaks_1816
chr13	102818488	102819738	FGSC_Peaks_1817
chr13	102884069	102885237	FGSC_Peaks_1818
chr13	102900578	102901714	FGSC_Peaks_1819
chr13	103065931	103066959	FGSC_Peaks_1820
chr13	103176586	103177729	FGSC_Peaks_1821
chr13	103769506	103770611	FGSC_Peaks_1822
chr13	103839045	103840241	FGSC_Peaks_1823
chr13	103881078	103882188	FGSC_Peaks_1824
chr13	104398864	104399807	FGSC_Peaks_1825
chr13	104729076	104730527	FGSC_Peaks_1826
chr13	105039464	105040471	FGSC_Peaks_1827
chr13	106113790	106114826	FGSC_Peaks_1828
chr13	106195837	106196983	FGSC_Peaks_1829
chr13	106198116	106199230	FGSC_Peaks_1830
chr13	106982027	106983421	FGSC_Peaks_1831
chr13	106984814	106985947	FGSC_Peaks_1832
chr13	107087284	107088393	FGSC_Peaks_1833
chr13	107207459	107208534	FGSC_Peaks_1834
chr13	107263770	107264874	FGSC_Peaks_1835
chr13	107326374	107327860	FGSC_Peaks_1836
chr13	107421258	107422144	FGSC_Peaks_1837
chr13	107989305	107990344	FGSC_Peaks_1838
chr13	108364539	108365726	FGSC_Peaks_1839
chr13	108692805	108693802	FGSC_Peaks_1840
chr13	108739048	108740243	FGSC_Peaks_1841
chr13	108873845	108874595	FGSC_Peaks_1842
chr13	109269727	109270913	FGSC_Peaks_1843
chr13	109779497	109780476	FGSC_Peaks_1844
chr13	110121711	110122494	FGSC_Peaks_1845
chr13	110284279	110285794	FGSC_Peaks_1846
chr13	110376340	110377180	FGSC_Peaks_1847
chr13	110673579	110674718	FGSC_Peaks_1848
chr13	110941205	110942340	FGSC_Peaks_1849
chr13	111177182	111178266	FGSC_Peaks_1850
chr13	111740495	111741606	FGSC_Peaks_1851
chr13	111751305	111752553	FGSC_Peaks_1852
chr13	111806650	111807381	FGSC_Peaks_1853
chr13	111826999	111827865	FGSC_Peaks_1854
chr13	112540948	112542065	FGSC_Peaks_1855
chr13	112892567	112893758	FGSC_Peaks_1856
chr13	113230608	113231778	FGSC_Peaks_1857
chr13	113408835	113410008	FGSC_Peaks_1858
chr13	113425022	113426124	FGSC_Peaks_1859
chr13	113585926	113587192	FGSC_Peaks_1860
chr13	113947253	113948149	FGSC_Peaks_1861
chr13	114009360	114010386	FGSC_Peaks_1862
chr13	114277003	114278105	FGSC_Peaks_1863
chr13	114431232	114432322	FGSC_Peaks_1864
chr13	114744095	114745232	FGSC_Peaks_1865
chr13	114756536	114757647	FGSC_Peaks_1866
chr13	115472165	115473457	FGSC_Peaks_1867
chr13	115574667	115576017	FGSC_Peaks_1868
chr13	115672532	115673610	FGSC_Peaks_1869
chr13	115948986	115950219	FGSC_Peaks_1870
chr13	116115142	116116603	FGSC_Peaks_1871
chr13	116354234	116355509	FGSC_Peaks_1872
chr13	117270988	117271930	FGSC_Peaks_1873
chr13	117410174	117411183	FGSC_Peaks_1874
chr13	117482067	117483238	FGSC_Peaks_1875
chr13	117601426	117602518	FGSC_Peaks_1876
chr13	117872332	117873576	FGSC_Peaks_1877
chr13	117985895	117986716	FGSC_Peaks_1878
chr13	118095229	118096383	FGSC_Peaks_1879
chr13	118748980	118749941	FGSC_Peaks_1880
chr13	118811106	118812354	FGSC_Peaks_1881
chr13	119400033	119401044	FGSC_Peaks_1882
chr13	119434801	119436053	FGSC_Peaks_1883
chr13	119647227	119648369	FGSC_Peaks_1884
chr14	8629158	8630363	FGSC_Peaks_1885
chr14	14752616	14753528	FGSC_Peaks_1886
chr14	17946032	17947074	FGSC_Peaks_1887
chr14	19395459	19396531	FGSC_Peaks_1888
chr14	19871078	19872173	FGSC_Peaks_1889
chr14	20585454	20586499	FGSC_Peaks_1890
chr14	21028851	21030013	FGSC_Peaks_1891
chr14	22434891	22436088	FGSC_Peaks_1892
chr14	26422570	26423911	FGSC_Peaks_1893
chr14	26706586	26707778	FGSC_Peaks_1894
chr14	31339946	31341091	FGSC_Peaks_1895
chr14	31729343	31730420	FGSC_Peaks_1896
chr14	32429437	32430604	FGSC_Peaks_1897
chr14	33133421	33134555	FGSC_Peaks_1898
chr14	34088319	34089453	FGSC_Peaks_1899
chr14	36970525	36971227	FGSC_Peaks_1900
chr14	40381405	40382594	FGSC_Peaks_1901
chr14	45343048	45344090	FGSC_Peaks_1902
chr14	45659116	45660439	FGSC_Peaks_1903
chr14	47415903	47417007	FGSC_Peaks_1904
chr14	47800715	47801729	FGSC_Peaks_1905
chr14	48173233	48174160	FGSC_Peaks_1906
chr14	48512739	48514105	FGSC_Peaks_1907
chr14	51408626	51409537	FGSC_Peaks_1908
chr14	52098361	52099410	FGSC_Peaks_1909
chr14	55379635	55380766	FGSC_Peaks_1910
chr14	55595381	55596407	FGSC_Peaks_1911
chr14	55672705	55673671	FGSC_Peaks_1912
chr14	55954312	55955462	FGSC_Peaks_1913
chr14	57639504	57640823	FGSC_Peaks_1914
chr14	58080222	58081383	FGSC_Peaks_1915
chr14	58917537	58918415	FGSC_Peaks_1916
chr14	62925681	62926694	FGSC_Peaks_1917
chr14	64492067	64493210	FGSC_Peaks_1918
chr14	65273299	65274372	FGSC_Peaks_1919
chr14	66584177	66584984	FGSC_Peaks_1920
chr14	67257057	67258185	FGSC_Peaks_1921
chr14	68003639	68004826	FGSC_Peaks_1922
chr14	68490979	68492076	FGSC_Peaks_1923
chr14	69001306	69002413	FGSC_Peaks_1924
chr14	70146264	70147457	FGSC_Peaks_1925
chr14	74204810	74205955	FGSC_Peaks_1926
chr14	74742258	74743311	FGSC_Peaks_1927
chr14	75504615	75505731	FGSC_Peaks_1928
chr14	75720960	75722325	FGSC_Peaks_1929
chr14	76167464	76168626	FGSC_Peaks_1930
chr14	76266310	76267182	FGSC_Peaks_1931
chr14	77143330	77144342	FGSC_Peaks_1932
chr14	77949680	77950462	FGSC_Peaks_1933
chr14	78244612	78245626	FGSC_Peaks_1934
chr14	79096552	79097399	FGSC_Peaks_1935
chr14	79633815	79635492	FGSC_Peaks_1936
chr14	80285075	80286203	FGSC_Peaks_1937
chr14	81570855	81572284	FGSC_Peaks_1938
chr14	83346367	83347148	FGSC_Peaks_1939
chr14	84077640	84078797	FGSC_Peaks_1940
chr14	84451368	84452408	FGSC_Peaks_1941
chr14	88651248	88653022	FGSC_Peaks_1942
chr14	90000985	90002175	FGSC_Peaks_1943
chr14	91472611	91474038	FGSC_Peaks_1944
chr14	97883299	97884268	FGSC_Peaks_1945
chr14	98519227	98520447	FGSC_Peaks_1946
chr14	100559789	100560832	FGSC_Peaks_1947
chr14	101039844	101040965	FGSC_Peaks_1948
chr14	102082944	102084117	FGSC_Peaks_1949
chr14	102093894	102094869	FGSC_Peaks_1950
chr14	103646126	103647149	FGSC_Peaks_1951
chr14	104562110	104563043	FGSC_Peaks_1952
chr14	105184930	105185752	FGSC_Peaks_1953
chr14	105337688	105338477	FGSC_Peaks_1954
chr14	110620680	110621732	FGSC_Peaks_1955
chr14	113092721	113093845	FGSC_Peaks_1956
chr14	113314791	113315537	FGSC_Peaks_1957
chr14	116620700	116621746	FGSC_Peaks_1958
chr14	116632843	116633964	FGSC_Peaks_1959
chr14	119360092	119360858	FGSC_Peaks_1960
chr14	122876866	122877879	FGSC_Peaks_1961
chr14	123024364	123025557	FGSC_Peaks_1962
chr14	123661925	123662714	FGSC_Peaks_1963
chr15	3459670	3460942	FGSC_Peaks_1964
chr15	3799011	3800246	FGSC_Peaks_1965
chr15	4140153	4141750	FGSC_Peaks_1966
chr15	4180020	4181397	FGSC_Peaks_1967
chr15	4402636	4403734	FGSC_Peaks_1968
chr15	4590205	4591287	FGSC_Peaks_1969
chr15	5717829	5718485	FGSC_Peaks_1970
chr15	5871004	5871783	FGSC_Peaks_1971
chr15	6032519	6033512	FGSC_Peaks_1972
chr15	6224918	6225960	FGSC_Peaks_1973
chr15	6294223	6295149	FGSC_Peaks_1974
chr15	6391984	6393221	FGSC_Peaks_1975
chr15	6425643	6426759	FGSC_Peaks_1976
chr15	6468105	6469240	FGSC_Peaks_1977
chr15	7017780	7018853	FGSC_Peaks_1978
chr15	7115373	7116390	FGSC_Peaks_1979
chr15	7876919	7878280	FGSC_Peaks_1980
chr15	8212402	8213513	FGSC_Peaks_1981
chr15	8303054	8304486	FGSC_Peaks_1982
chr15	8847441	8848430	FGSC_Peaks_1983
chr15	9715393	9716499	FGSC_Peaks_1984
chr15	9781035	9781992	FGSC_Peaks_1985
chr15	9893955	9894994	FGSC_Peaks_1986
chr15	10704210	10705101	FGSC_Peaks_1987
chr15	11243722	11244784	FGSC_Peaks_1988
chr15	11266335	11267467	FGSC_Peaks_1989
chr15	11586049	11587381	FGSC_Peaks_1990
chr15	11828137	11829129	FGSC_Peaks_1991
chr15	12151953	12153129	FGSC_Peaks_1992
chr15	12639525	12640675	FGSC_Peaks_1993
chr15	13546432	13548261	FGSC_Peaks_1994
chr15	13606840	13607499	FGSC_Peaks_1995
chr15	14197174	14198299	FGSC_Peaks_1996
chr15	14629028	14630164	FGSC_Peaks_1997
chr15	14767171	14768299	FGSC_Peaks_1998
chr15	15150641	15152047	FGSC_Peaks_1999
[truncated: 3,991 more rows]

## Sheet: ESC_STAT3_FDR_peaks
Chr	Start	End	Names
chr1	4972423	4972734	ESC_Peaks_1
chr1	5022794	5023328	ESC_Peaks_2
chr1	9952410	9952613	ESC_Peaks_3
chr1	10084436	10084774	ESC_Peaks_4
chr1	11277745	11278319	ESC_Peaks_5
chr1	12744427	12745052	ESC_Peaks_6
chr1	13094598	13094834	ESC_Peaks_7
chr1	14312633	14313018	ESC_Peaks_8
chr1	20867474	20867977	ESC_Peaks_9
chr1	20890392	20890666	ESC_Peaks_10
chr1	21247927	21248166	ESC_Peaks_11
chr1	22533166	22533467	ESC_Peaks_12
chr1	23968261	23968913	ESC_Peaks_13
chr1	33945025	33945427	ESC_Peaks_14
chr1	33945906	33946123	ESC_Peaks_15
chr1	34077308	34077697	ESC_Peaks_16
chr1	34103679	34104118	ESC_Peaks_17
chr1	35926320	35926627	ESC_Peaks_18
chr1	36010957	36011367	ESC_Peaks_19
chr1	36060776	36061475	ESC_Peaks_20
chr1	36983554	36983980	ESC_Peaks_21
chr1	36985745	36986318	ESC_Peaks_22
chr1	36987605	36988280	ESC_Peaks_23
chr1	37890157	37890547	ESC_Peaks_24
chr1	41390267	41390568	ESC_Peaks_25
chr1	42436638	42437079	ESC_Peaks_26
chr1	52113665	52114067	ESC_Peaks_27
chr1	52233444	52233783	ESC_Peaks_28
chr1	54250469	54250824	ESC_Peaks_29
chr1	55052586	55052895	ESC_Peaks_30
chr1	57612204	57612467	ESC_Peaks_31
chr1	57613236	57613523	ESC_Peaks_32
chr1	58188472	58188786	ESC_Peaks_33
chr1	58423792	58424256	ESC_Peaks_34
chr1	58795489	58795765	ESC_Peaks_35
chr1	59376024	59376537	ESC_Peaks_36
chr1	59377164	59377633	ESC_Peaks_37
chr1	60180144	60180544	ESC_Peaks_38
chr1	62181647	62182138	ESC_Peaks_39
chr1	62564311	62564745	ESC_Peaks_40
chr1	62767630	62768099	ESC_Peaks_41
chr1	62772381	62772721	ESC_Peaks_42
chr1	64732585	64733215	ESC_Peaks_43
chr1	71652650	71652908	ESC_Peaks_44
chr1	71673338	71673888	ESC_Peaks_45
chr1	72228970	72229339	ESC_Peaks_46
chr1	73541134	73541512	ESC_Peaks_47
chr1	74111255	74111630	ESC_Peaks_48
chr1	74308429	74308724	ESC_Peaks_49
chr1	74386734	74387197	ESC_Peaks_50
chr1	74397240	74397636	ESC_Peaks_51
chr1	75447397	75447834	ESC_Peaks_52
chr1	75511457	75511781	ESC_Peaks_53
chr1	76003413	76003531	ESC_Peaks_54
chr1	76029101	76029405	ESC_Peaks_55
chr1	76244414	76244721	ESC_Peaks_56
chr1	77453710	77454291	ESC_Peaks_57
chr1	82839108	82839447	ESC_Peaks_58
chr1	84860675	84861294	ESC_Peaks_59
chr1	85277705	85278076	ESC_Peaks_60
chr1	85280358	85280715	ESC_Peaks_61
chr1	85591071	85593452	ESC_Peaks_62
chr1	86187809	86188308	ESC_Peaks_63
chr1	86301344	86301712	ESC_Peaks_64
chr1	86309138	86309688	ESC_Peaks_65
chr1	86310986	86311855	ESC_Peaks_66
chr1	86456786	86457231	ESC_Peaks_67
chr1	86526113	86526608	ESC_Peaks_68
chr1	87213616	87214006	ESC_Peaks_69
chr1	87676006	87676440	ESC_Peaks_70
chr1	89756512	89756875	ESC_Peaks_71
chr1	89870572	89871078	ESC_Peaks_72
chr1	89927388	89927726	ESC_Peaks_73
chr1	89935713	89936307	ESC_Peaks_74
chr1	92348351	92348809	ESC_Peaks_75
chr1	92919065	92919460	ESC_Peaks_76
chr1	93801671	93802088	ESC_Peaks_77
chr1	98055632	98055913	ESC_Peaks_78
chr1	103067152	103067455	ESC_Peaks_79
chr1	105423417	105423680	ESC_Peaks_80
chr1	114849660	114850203	ESC_Peaks_81
chr1	118648031	118648431	ESC_Peaks_82
chr1	118689681	118690237	ESC_Peaks_83
chr1	119075478	119076339	ESC_Peaks_84
chr1	119305179	119305776	ESC_Peaks_85
chr1	119398649	119399279	ESC_Peaks_86
chr1	121006335	121006768	ESC_Peaks_87
chr1	121087055	121087529	ESC_Peaks_88
chr1	125687942	125688269	ESC_Peaks_89
chr1	127507341	127507563	ESC_Peaks_90
chr1	127783913	127784255	ESC_Peaks_91
chr1	131129443	131130004	ESC_Peaks_92
chr1	131827584	131828080	ESC_Peaks_93
chr1	132158619	132159189	ESC_Peaks_94
chr1	132200651	132201235	ESC_Peaks_95
chr1	132850743	132851263	ESC_Peaks_96
chr1	132879153	132879450	ESC_Peaks_97
chr1	132981241	132981714	ESC_Peaks_98
chr1	133084084	133084565	ESC_Peaks_99
chr1	133493462	133493697	ESC_Peaks_100
chr1	133691536	133691889	ESC_Peaks_101
chr1	133694395	133694901	ESC_Peaks_102
chr1	135687332	135687495	ESC_Peaks_103
chr1	136415248	136415759	ESC_Peaks_104
chr1	136570183	136570697	ESC_Peaks_105
chr1	136698420	136698720	ESC_Peaks_106
chr1	136951300	136951640	ESC_Peaks_107
chr1	145077650	145077813	ESC_Peaks_108
chr1	146325007	146325315	ESC_Peaks_109
chr1	150496904	150497189	ESC_Peaks_110
chr1	151304880	151305281	ESC_Peaks_111
chr1	152603625	152603973	ESC_Peaks_112
chr1	152915866	152916123	ESC_Peaks_113
chr1	152916823	152917317	ESC_Peaks_114
chr1	152976523	152976790	ESC_Peaks_115
chr1	153095202	153095765	ESC_Peaks_116
chr1	153095981	153096574	ESC_Peaks_117
chr1	153376302	153376844	ESC_Peaks_118
chr1	153501959	153502367	ESC_Peaks_119
chr1	153590248	153590773	ESC_Peaks_120
chr1	154080849	154081336	ESC_Peaks_121
chr1	156956331	156956775	ESC_Peaks_122
chr1	156983525	156983829	ESC_Peaks_123
chr1	158202986	158203339	ESC_Peaks_124
chr1	160044320	160044753	ESC_Peaks_125
chr1	160309097	160309387	ESC_Peaks_126
chr1	160310054	160310408	ESC_Peaks_127
chr1	161876936	161877456	ESC_Peaks_128
chr1	161918509	161918885	ESC_Peaks_129
chr1	164377080	164377552	ESC_Peaks_130
chr1	164470330	164470609	ESC_Peaks_131
chr1	164483770	164484160	ESC_Peaks_132
chr1	165861701	165862024	ESC_Peaks_133
chr1	166124907	166125556	ESC_Peaks_134
chr1	166126677	166127344	ESC_Peaks_135
chr1	166164529	166165048	ESC_Peaks_136
chr1	166282644	166283127	ESC_Peaks_137
chr1	167238587	167238942	ESC_Peaks_138
chr1	167279283	167279768	ESC_Peaks_139
chr1	168065631	168066187	ESC_Peaks_140
chr1	170426573	170426816	ESC_Peaks_141
chr1	170521595	170521963	ESC_Peaks_142
chr1	170967559	170968193	ESC_Peaks_143
chr1	171226882	171227099	ESC_Peaks_144
chr1	178571862	178572294	ESC_Peaks_145
chr1	179198131	179198393	ESC_Peaks_146
chr1	179198819	179199112	ESC_Peaks_147
chr1	180250559	180251013	ESC_Peaks_148
chr1	180284033	180284453	ESC_Peaks_149
chr1	180571247	180571662	ESC_Peaks_150
chr1	180850739	180851116	ESC_Peaks_151
chr1	180888469	180889187	ESC_Peaks_152
chr1	182030070	182030615	ESC_Peaks_153
chr1	182040498	182041026	ESC_Peaks_154
chr1	182463807	182464167	ESC_Peaks_155
chr1	184705264	184705612	ESC_Peaks_156
chr1	184824528	184824820	ESC_Peaks_157
chr1	185100822	185101208	ESC_Peaks_158
chr1	186513938	186514372	ESC_Peaks_159
chr1	186976714	186977220	ESC_Peaks_160
chr1	187724732	187725056	ESC_Peaks_161
chr1	191946218	191946686	ESC_Peaks_162
chr1	192454986	192455400	ESC_Peaks_163
chr1	193928697	193929015	ESC_Peaks_164
chr1	194505864	194506225	ESC_Peaks_165
chr10	3940940	3941857	ESC_Peaks_166
chr10	4061182	4061474	ESC_Peaks_167
chr10	4107610	4108125	ESC_Peaks_168
chr10	4108365	4108716	ESC_Peaks_169
chr10	11846098	11846634	ESC_Peaks_170
chr10	12878910	12879140	ESC_Peaks_171
chr10	13090947	13091298	ESC_Peaks_172
chr10	18634297	18634898	ESC_Peaks_173
chr10	21042917	21043194	ESC_Peaks_174
chr10	21048710	21049057	ESC_Peaks_175
chr10	21101860	21102535	ESC_Peaks_176
chr10	21746077	21746482	ESC_Peaks_177
chr10	21828978	21829588	ESC_Peaks_178
chr10	21845589	21846167	ESC_Peaks_179
chr10	21982224	21982589	ESC_Peaks_180
chr10	21988389	21988809	ESC_Peaks_181
chr10	24616699	24617063	ESC_Peaks_182
chr10	24869760	24870090	ESC_Peaks_183
chr10	25427655	25427970	ESC_Peaks_184
chr10	26334131	26334399	ESC_Peaks_185
chr10	26695134	26695583	ESC_Peaks_186
chr10	28087851	28088312	ESC_Peaks_187
chr10	34233975	34234424	ESC_Peaks_188
chr10	37231244	37231538	ESC_Peaks_189
chr10	38596134	38596510	ESC_Peaks_190
chr10	39140821	39141140	ESC_Peaks_191
chr10	39534270	39534685	ESC_Peaks_192
chr10	40258387	40258905	ESC_Peaks_193
chr10	40348890	40349199	ESC_Peaks_194
chr10	41006638	41007029	ESC_Peaks_195
chr10	41467440	41467728	ESC_Peaks_196
chr10	41684513	41684969	ESC_Peaks_197
chr10	42204905	42205195	ESC_Peaks_198
chr10	42761165	42761497	ESC_Peaks_199
chr10	43221140	43221584	ESC_Peaks_200
chr10	43479864	43480123	ESC_Peaks_201
chr10	43551585	43551907	ESC_Peaks_202
chr10	43939188	43939642	ESC_Peaks_203
chr10	44391582	44392383	ESC_Peaks_204
chr10	45446114	45446531	ESC_Peaks_205
chr10	46689813	46690119	ESC_Peaks_206
chr10	52278123	52278618	ESC_Peaks_207
chr10	54075640	54076008	ESC_Peaks_208
chr10	56115047	56115345	ESC_Peaks_209
chr10	56228656	56229093	ESC_Peaks_210
chr10	58342958	58343226	ESC_Peaks_211
chr10	58601549	58601914	ESC_Peaks_212
chr10	59547281	59547754	ESC_Peaks_213
chr10	59916493	59916859	ESC_Peaks_214
chr10	59972483	59972869	ESC_Peaks_215
chr10	59974235	59974748	ESC_Peaks_216
chr10	60726930	60727348	ESC_Peaks_217
chr10	61074630	61075036	ESC_Peaks_218
chr10	61355641	61355937	ESC_Peaks_219
chr10	61394763	61395130	ESC_Peaks_220
chr10	61831756	61832192	ESC_Peaks_221
chr10	61929009	61929632	ESC_Peaks_222
chr10	62057652	62058211	ESC_Peaks_223
chr10	62892544	62893380	ESC_Peaks_224
chr10	62894426	62894741	ESC_Peaks_225
chr10	62895449	62895926	ESC_Peaks_226
chr10	62896841	62897193	ESC_Peaks_227
chr10	62973049	62973465	ESC_Peaks_228
chr10	66897061	66897787	ESC_Peaks_229
chr10	67287839	67288245	ESC_Peaks_230
chr10	68043942	68044331	ESC_Peaks_231
chr10	68136588	68137099	ESC_Peaks_232
chr10	68137188	68137892	ESC_Peaks_233
chr10	68180142	68180419	ESC_Peaks_234
chr10	68230223	68230534	ESC_Peaks_235
chr10	70097746	70098166	ESC_Peaks_236
chr10	70733957	70734433	ESC_Peaks_237
chr10	73039623	73040113	ESC_Peaks_238
chr10	74257785	74258111	ESC_Peaks_239
chr10	75261236	75261573	ESC_Peaks_240
chr10	75648998	75649453	ESC_Peaks_241
chr10	75851005	75851502	ESC_Peaks_242
chr10	76027922	76028376	ESC_Peaks_243
chr10	77199266	77199589	ESC_Peaks_244
chr10	78049490	78049941	ESC_Peaks_245
chr10	78096695	78096932	ESC_Peaks_246
chr10	78391064	78391455	ESC_Peaks_247
chr10	79638796	79639135	ESC_Peaks_248
chr10	79673097	79673481	ESC_Peaks_249
chr10	79726177	79726653	ESC_Peaks_250
chr10	79739150	79739679	ESC_Peaks_251
chr10	79840704	79840984	ESC_Peaks_252
chr10	79861296	79861626	ESC_Peaks_253
chr10	80014252	80014750	ESC_Peaks_254
chr10	80045576	80046155	ESC_Peaks_255
chr10	80075158	80075704	ESC_Peaks_256
chr10	80398591	80398826	ESC_Peaks_257
chr10	81141089	81141970	ESC_Peaks_258
chr10	81542830	81543201	ESC_Peaks_259
chr10	82623154	82623560	ESC_Peaks_260
chr10	83347570	83347861	ESC_Peaks_261
chr10	84554651	84554954	ESC_Peaks_262
chr10	84910756	84911291	ESC_Peaks_263
chr10	85503444	85503766	ESC_Peaks_264
chr10	85525731	85526007	ESC_Peaks_265
chr10	88717368	88717604	ESC_Peaks_266
chr10	89744719	89745028	ESC_Peaks_267
chr10	91180224	91180595	ESC_Peaks_268
chr10	92816982	92817322	ESC_Peaks_269
chr10	95175304	95175682	ESC_Peaks_270
chr10	95312806	95313378	ESC_Peaks_271
chr10	95415266	95415739	ESC_Peaks_272
chr10	95416653	95417517	ESC_Peaks_273
chr10	95883525	95884165	ESC_Peaks_274
chr10	95892179	95892579	ESC_Peaks_275
chr10	96733546	96733883	ESC_Peaks_276
chr10	97695261	97695512	ESC_Peaks_277
chr10	99209302	99209740	ESC_Peaks_278
chr10	99353471	99354097	ESC_Peaks_279
chr10	99461145	99461483	ESC_Peaks_280
chr10	99472812	99473156	ESC_Peaks_281
chr10	99524745	99525104	ESC_Peaks_282
chr10	108286668	108287076	ESC_Peaks_283
chr10	110854755	110855097	ESC_Peaks_284
chr10	115251261	115251792	ESC_Peaks_285
chr10	117953112	117953447	ESC_Peaks_286
chr10	118601580	118601972	ESC_Peaks_287
chr10	120171074	120171896	ESC_Peaks_288
chr10	121450532	121450869	ESC_Peaks_289
chr10	125184108	125184593	ESC_Peaks_290
chr10	125839637	125840019	ESC_Peaks_291
chr10	126928053	126928528	ESC_Peaks_292
chr10	126972062	126972343	ESC_Peaks_293
chr10	128246928	128247799	ESC_Peaks_294
chr10	128524616	128525176	ESC_Peaks_295
chr10	128525889	128526292	ESC_Peaks_296
chr10	128645734	128645984	ESC_Peaks_297
chr10	128909456	128909971	ESC_Peaks_298
chr10	130293805	130294130	ESC_Peaks_299
chr11	3123769	3124217	ESC_Peaks_300
chr11	3142205	3145360	ESC_Peaks_301
chr11	3191620	3194419	ESC_Peaks_302
chr11	3335660	3336014	ESC_Peaks_303
chr11	3337728	3338259	ESC_Peaks_304
chr11	4247279	4247961	ESC_Peaks_305
chr11	4440895	4441386	ESC_Peaks_306
chr11	4745701	4746161	ESC_Peaks_307
chr11	4757051	4757290	ESC_Peaks_308
chr11	4803023	4803438	ESC_Peaks_309
chr11	4849598	4849896	ESC_Peaks_310
chr11	5499006	5499621	ESC_Peaks_311
chr11	5802102	5802507	ESC_Peaks_312
chr11	5942920	5943491	ESC_Peaks_313
chr11	6367185	6367526	ESC_Peaks_314
chr11	6840818	6841173	ESC_Peaks_315
chr11	6894953	6895515	ESC_Peaks_316
chr11	7423419	7424051	ESC_Peaks_317
chr11	8569253	8569964	ESC_Peaks_318
chr11	8575627	8576216	ESC_Peaks_319
chr11	8587284	8587745	ESC_Peaks_320
chr11	8589234	8589664	ESC_Peaks_321
chr11	8811723	8812095	ESC_Peaks_322
chr11	9115913	9116503	ESC_Peaks_323
chr11	9116934	9117440	ESC_Peaks_324
chr11	11881770	11882091	ESC_Peaks_325
chr11	12466980	12467676	ESC_Peaks_326
chr11	16590629	16590894	ESC_Peaks_327
chr11	17257427	17257771	ESC_Peaks_328
chr11	17461013	17461386	ESC_Peaks_329
chr11	17909761	17910139	ESC_Peaks_330
chr11	19919407	19919878	ESC_Peaks_331
chr11	20320727	20321145	ESC_Peaks_332
chr11	21572148	21572489	ESC_Peaks_333
chr11	23255821	23256225	ESC_Peaks_334
chr11	23801731	23802162	ESC_Peaks_335
chr11	26129066	26129403	ESC_Peaks_336
chr11	29130557	29130931	ESC_Peaks_337
chr11	29514823	29515260	ESC_Peaks_338
chr11	29548121	29548420	ESC_Peaks_339
chr11	29692669	29693160	ESC_Peaks_340
chr11	30749391	30749753	ESC_Peaks_341
chr11	30750497	30750908	ESC_Peaks_342
chr11	33533566	33533897	ESC_Peaks_343
chr11	33537366	33537965	ESC_Peaks_344
chr11	35976213	35976608	ESC_Peaks_345
chr11	36548105	36548425	ESC_Peaks_346
chr11	44621644	44621924	ESC_Peaks_347
chr11	44746664	44747205	ESC_Peaks_348
chr11	44767436	44767671	ESC_Peaks_349
chr11	44841682	44842058	ESC_Peaks_350
chr11	46055762	46056113	ESC_Peaks_351
chr11	46115025	46115492	ESC_Peaks_352
chr11	47640428	47640990	ESC_Peaks_353
chr11	48817356	48817671	ESC_Peaks_354
chr11	49659019	49659469	ESC_Peaks_355
chr11	49764547	49764976	ESC_Peaks_356
chr11	49773437	49773747	ESC_Peaks_357
chr11	49793097	49793447	ESC_Peaks_358
chr11	49820851	49821299	ESC_Peaks_359
chr11	51822847	51823211	ESC_Peaks_360
chr11	51916715	51916985	ESC_Peaks_361
chr11	52359650	52360128	ESC_Peaks_362
chr11	53769597	53770116	ESC_Peaks_363
chr11	54751500	54751860	ESC_Peaks_364
chr11	55146949	55147186	ESC_Peaks_365
chr11	55417725	55418191	ESC_Peaks_366
chr11	55944974	55945286	ESC_Peaks_367
chr11	55946473	55947030	ESC_Peaks_368
chr11	55949685	55950069	ESC_Peaks_369
chr11	57488996	57489357	ESC_Peaks_370
chr11	57790943	57791184	ESC_Peaks_371
chr11	59893172	59893601	ESC_Peaks_372
chr11	59956793	59957073	ESC_Peaks_373
chr11	60220538	60220908	ESC_Peaks_374
chr11	60438276	60438638	ESC_Peaks_375
chr11	61003989	61004513	ESC_Peaks_376
chr11	61004816	61005143	ESC_Peaks_377
chr11	62511461	62511783	ESC_Peaks_378
chr11	62551575	62551890	ESC_Peaks_379
chr11	62566001	62566286	ESC_Peaks_380
chr11	63898465	63898876	ESC_Peaks_381
chr11	68348051	68348469	ESC_Peaks_382
chr11	68398650	68398915	ESC_Peaks_383
chr11	68401419	68401827	ESC_Peaks_384
chr11	69073405	69073726	ESC_Peaks_385
chr11	69088427	69088665	ESC_Peaks_386
chr11	69452060	69452394	ESC_Peaks_387
chr11	69581817	69582175	ESC_Peaks_388
chr11	69600102	69600688	ESC_Peaks_389
chr11	69708516	69708923	ESC_Peaks_390
chr11	69784969	69785394	ESC_Peaks_391
chr11	69921560	69922007	ESC_Peaks_392
chr11	69990812	69991093	ESC_Peaks_393
chr11	72410448	72410828	ESC_Peaks_394
chr11	72576285	72576727	ESC_Peaks_395
chr11	74649083	74649472	ESC_Peaks_396
chr11	74838487	74838762	ESC_Peaks_397
chr11	75294196	75294415	ESC_Peaks_398
chr11	75802262	75802510	ESC_Peaks_399
chr11	76287227	76287888	ESC_Peaks_400
chr11	76483179	76483590	ESC_Peaks_401
chr11	77497365	77497797	ESC_Peaks_402
chr11	77497846	77498256	ESC_Peaks_403
chr11	77738547	77738993	ESC_Peaks_404
chr11	77810926	77811153	ESC_Peaks_405
chr11	77884587	77885014	ESC_Peaks_406
chr11	77893850	77894271	ESC_Peaks_407
chr11	79002474	79002962	ESC_Peaks_408
chr11	79675744	79676241	ESC_Peaks_409
chr11	79974208	79974704	ESC_Peaks_410
chr11	80174540	80174852	ESC_Peaks_411
chr11	80177323	80177798	ESC_Peaks_412
chr11	80818016	80818689	ESC_Peaks_413
chr11	80889259	80889633	ESC_Peaks_414
chr11	80889650	80890038	ESC_Peaks_415
chr11	81620559	81620874	ESC_Peaks_416
chr11	83440870	83441209	ESC_Peaks_417
chr11	85140022	85140480	ESC_Peaks_418
chr11	85248163	85248477	ESC_Peaks_419
chr11	87422817	87423183	ESC_Peaks_420
chr11	88689724	88690412	ESC_Peaks_421
chr11	88739607	88740005	ESC_Peaks_422
chr11	88843345	88843651	ESC_Peaks_423
chr11	88995664	88996086	ESC_Peaks_424
chr11	88996346	88996867	ESC_Peaks_425
chr11	89105961	89106200	ESC_Peaks_426
chr11	89186844	89187118	ESC_Peaks_427
chr11	89623444	89623625	ESC_Peaks_428
chr11	90894693	90894967	ESC_Peaks_429
chr11	93972816	93973383	ESC_Peaks_430
chr11	95600530	95600939	ESC_Peaks_431
chr11	95704250	95704649	ESC_Peaks_432
chr11	96017782	96018474	ESC_Peaks_433
chr11	96111767	96112106	ESC_Peaks_434
chr11	96190159	96190653	ESC_Peaks_435
chr11	96713581	96713923	ESC_Peaks_436
chr11	97282247	97282500	ESC_Peaks_437
chr11	97286894	97287390	ESC_Peaks_438
chr11	97393459	97394011	ESC_Peaks_439
chr11	97412128	97412592	ESC_Peaks_440
chr11	97513031	97513431	ESC_Peaks_441
chr11	97661556	97662375	ESC_Peaks_442
chr11	97826524	97826833	ESC_Peaks_443
chr11	97916050	97916521	ESC_Peaks_444
chr11	98682274	98682714	ESC_Peaks_445
chr11	98775121	98775569	ESC_Peaks_446
chr11	98955363	98955700	ESC_Peaks_447
chr11	100320404	100320678	ESC_Peaks_448
chr11	100386587	100386980	ESC_Peaks_449
chr11	100501254	100501829	ESC_Peaks_450
chr11	100570763	100571275	ESC_Peaks_451
chr11	100939329	100940111	ESC_Peaks_452
chr11	102267459	102267921	ESC_Peaks_453
chr11	102582278	102582625	ESC_Peaks_454
chr11	102819462	102819975	ESC_Peaks_455
chr11	103267581	103267916	ESC_Peaks_456
chr11	103348099	103348394	ESC_Peaks_457
chr11	105944333	105944685	ESC_Peaks_458
chr11	105950505	105950735	ESC_Peaks_459
chr11	106272715	106273366	ESC_Peaks_460
chr11	106573423	106573926	ESC_Peaks_461
chr11	106788267	106788910	ESC_Peaks_462
chr11	107276944	107277375	ESC_Peaks_463
chr11	107352525	107353111	ESC_Peaks_464
chr11	107354495	107354847	ESC_Peaks_465
chr11	107509558	107509921	ESC_Peaks_466
chr11	109473020	109473603	ESC_Peaks_467
chr11	112976945	112977308	ESC_Peaks_468
chr11	113709814	113710243	ESC_Peaks_469
chr11	113736947	113737294	ESC_Peaks_470
chr11	114639733	114640118	ESC_Peaks_471
chr11	114675117	114675523	ESC_Peaks_472
chr11	115441404	115441775	ESC_Peaks_473
chr11	116030464	116030814	ESC_Peaks_474
chr11	116294378	116294689	ESC_Peaks_475
chr11	116426908	116427328	ESC_Peaks_476
chr11	116436701	116437232	ESC_Peaks_477
chr11	116586341	116586747	ESC_Peaks_478
chr11	116616248	116616580	ESC_Peaks_479
chr11	117307873	117308847	ESC_Peaks_480
chr11	117319904	117320267	ESC_Peaks_481
chr11	117443326	117443736	ESC_Peaks_482
chr11	117875474	117876174	ESC_Peaks_483
chr11	117887997	117888664	ESC_Peaks_484
chr11	117888878	117889497	ESC_Peaks_485
chr11	117890331	117890857	ESC_Peaks_486
chr11	117902329	117902863	ESC_Peaks_487
chr11	117930812	117931345	ESC_Peaks_488
chr11	117934020	117934758	ESC_Peaks_489
chr11	117952113	117952592	ESC_Peaks_490
chr11	117962050	117962871	ESC_Peaks_491
chr11	117963243	117963987	ESC_Peaks_492
chr11	117969035	117969721	ESC_Peaks_493
chr11	117972695	117973036	ESC_Peaks_494
chr11	117974408	117975133	ESC_Peaks_495
chr11	117975336	117976451	ESC_Peaks_496
chr11	118007516	118008592	ESC_Peaks_497
chr11	118034276	118034813	ESC_Peaks_498
chr11	118467568	118468034	ESC_Peaks_499
chr11	119381917	119382416	ESC_Peaks_500
chr11	119630308	119630559	ESC_Peaks_501
chr11	120663714	120664191	ESC_Peaks_502
chr11	120799909	120800177	ESC_Peaks_503
chr11	120805508	120805901	ESC_Peaks_504
chr11	120824833	120825162	ESC_Peaks_505
chr11	121672871	121673464	ESC_Peaks_506
chr12	3590100	3590317	ESC_Peaks_507
chr12	3981364	3982006	ESC_Peaks_508
chr12	8868641	8869054	ESC_Peaks_509
chr12	9478296	9478589	ESC_Peaks_510
chr12	11204500	11204809	ESC_Peaks_511
chr12	12784295	12784695	ESC_Peaks_512
chr12	12787073	12787552	ESC_Peaks_513
chr12	12803585	12804110	ESC_Peaks_514
chr12	12943049	12943984	ESC_Peaks_515
chr12	17544764	17545009	ESC_Peaks_516
chr12	17548147	17548390	ESC_Peaks_517
chr12	17779156	17779450	ESC_Peaks_518
chr12	18135652	18135860	ESC_Peaks_519
chr12	21418613	21418995	ESC_Peaks_520
chr12	25068666	25068983	ESC_Peaks_521
chr12	25083491	25084024	ESC_Peaks_522
chr12	27082690	27082970	ESC_Peaks_523
chr12	27140138	27140624	ESC_Peaks_524
chr12	30373212	30373601	ESC_Peaks_525
chr12	36153179	36153585	ESC_Peaks_526
chr12	38779339	38779559	ESC_Peaks_527
chr12	39667745	39668033	ESC_Peaks_528
chr12	39998013	39998399	ESC_Peaks_529
chr12	40704306	40704733	ESC_Peaks_530
chr12	40917419	40917787	ESC_Peaks_531
chr12	41386676	41387042	ESC_Peaks_532
chr12	41729844	41730192	ESC_Peaks_533
chr12	44640637	44641084	ESC_Peaks_534
chr12	51521573	51522044	ESC_Peaks_535
chr12	51655988	51656268	ESC_Peaks_536
chr12	52276328	52276673	ESC_Peaks_537
chr12	53032753	53033179	ESC_Peaks_538
chr12	56296455	56297043	ESC_Peaks_539
chr12	58474256	58474570	ESC_Peaks_540
chr12	59040253	59040699	ESC_Peaks_541
chr12	69210463	69210850	ESC_Peaks_542
chr12	69371457	69372047	ESC_Peaks_543
chr12	70627672	70628000	ESC_Peaks_544
chr12	70711048	70711459	ESC_Peaks_545
chr12	71242072	71242509	ESC_Peaks_546
chr12	71296092	71296542	ESC_Peaks_547
chr12	71296742	71297165	ESC_Peaks_548
chr12	71630470	71630911	ESC_Peaks_549
chr12	72085751	72086118	ESC_Peaks_550
chr12	72649515	72650080	ESC_Peaks_551
chr12	72734319	72734580	ESC_Peaks_552
chr12	72745457	72745752	ESC_Peaks_553
chr12	72844033	72844505	ESC_Peaks_554
chr12	73537805	73538247	ESC_Peaks_555
chr12	73793285	73793713	ESC_Peaks_556
chr12	74126037	74126351	ESC_Peaks_557
chr12	75927598	75927936	ESC_Peaks_558
chr12	76216785	76217070	ESC_Peaks_559
chr12	76254892	76255255	ESC_Peaks_560
chr12	76369422	76369840	ESC_Peaks_561
chr12	78848010	78848268	ESC_Peaks_562
chr12	79035335	79035750	ESC_Peaks_563
chr12	80111106	80111842	ESC_Peaks_564
chr12	80270939	80271299	ESC_Peaks_565
chr12	80318823	80319365	ESC_Peaks_566
chr12	80922911	80923213	ESC_Peaks_567
chr12	81816723	81817277	ESC_Peaks_568
chr12	83597085	83597453	ESC_Peaks_569
chr12	84175530	84175824	ESC_Peaks_570
chr12	84876766	84877160	ESC_Peaks_571
chr12	85219182	85219604	ESC_Peaks_572
chr12	85473373	85473797	ESC_Peaks_573
chr12	86478880	86479410	ESC_Peaks_574
chr12	86482022	86482305	ESC_Peaks_575
chr12	86498624	86499290	ESC_Peaks_576
chr12	86501585	86502382	ESC_Peaks_577
chr12	86504251	86504790	ESC_Peaks_578
chr12	86800844	86801579	ESC_Peaks_579
chr12	86816691	86817130	ESC_Peaks_580
chr12	86825057	86825392	ESC_Peaks_581
chr12	86912111	86912864	ESC_Peaks_582
chr12	86918592	86919040	ESC_Peaks_583
chr12	87224880	87225319	ESC_Peaks_584
chr12	87407848	87408256	ESC_Peaks_585
chr12	88360489	88360750	ESC_Peaks_586
chr12	91384247	91384659	ESC_Peaks_587
chr12	98627880	98628172	ESC_Peaks_588
chr12	101912855	101913281	ESC_Peaks_589
chr12	102730190	102730940	ESC_Peaks_590
chr12	103325489	103325850	ESC_Peaks_591
chr12	104247566	104247921	ESC_Peaks_592
chr12	104262839	104263286	ESC_Peaks_593
chr12	104448187	104448567	ESC_Peaks_594
chr12	104914790	104915270	ESC_Peaks_595
chr12	105757736	105758156	ESC_Peaks_596
chr12	106117156	106117580	ESC_Peaks_597
chr12	108959268	108959662	ESC_Peaks_598
chr12	109528157	109528680	ESC_Peaks_599
chr12	109530654	109531053	ESC_Peaks_600
chr12	109532536	109532875	ESC_Peaks_601
chr12	109881208	109881500	ESC_Peaks_602
chr12	110837101	110837644	ESC_Peaks_603
chr12	110979164	110979521	ESC_Peaks_604
chr12	112516949	112517347	ESC_Peaks_605
chr12	115615035	115615948	ESC_Peaks_606
chr13	6642344	6642792	ESC_Peaks_607
chr13	9310807	9311168	ESC_Peaks_608
chr13	12053640	12053839	ESC_Peaks_609
chr13	12176905	12177340	ESC_Peaks_610
chr13	16769401	16769803	ESC_Peaks_611
chr13	19390042	19390414	ESC_Peaks_612
chr13	20055216	20055560	ESC_Peaks_613
chr13	20097395	20097869	ESC_Peaks_614
chr13	20439571	20439838	ESC_Peaks_615
chr13	23741911	23742322	ESC_Peaks_616
chr13	23761345	23761717	ESC_Peaks_617
chr13	23997176	23997521	ESC_Peaks_618
chr13	24604720	24605153	ESC_Peaks_619
chr13	25020173	25020589	ESC_Peaks_620
chr13	28948535	28948806	ESC_Peaks_621
chr13	28988984	28989363	ESC_Peaks_622
chr13	30985779	30986155	ESC_Peaks_623
chr13	33920859	33921194	ESC_Peaks_624
chr13	34002581	34003027	ESC_Peaks_625
chr13	34109553	34110115	ESC_Peaks_626
chr13	34129646	34130148	ESC_Peaks_627
chr13	34287422	34288136	ESC_Peaks_628
chr13	34827172	34827602	ESC_Peaks_629
chr13	35581587	35582058	ESC_Peaks_630
chr13	35769603	35769950	ESC_Peaks_631
chr13	37436180	37436784	ESC_Peaks_632
chr13	37440591	37441044	ESC_Peaks_633
chr13	37853927	37854354	ESC_Peaks_634
chr13	38109004	38109272	ESC_Peaks_635
chr13	39824283	39824619	ESC_Peaks_636
chr13	40852055	40852522	ESC_Peaks_637
chr13	40868862	40869292	ESC_Peaks_638
chr13	40871788	40871984	ESC_Peaks_639
chr13	43908347	43908753	ESC_Peaks_640
chr13	43936394	43936844	ESC_Peaks_641
chr13	43938610	43938959	ESC_Peaks_642
chr13	44851484	44852019	ESC_Peaks_643
chr13	45298466	45298724	ESC_Peaks_644
chr13	46727945	46728275	ESC_Peaks_645
chr13	46758767	46759166	ESC_Peaks_646
chr13	46772727	46773072	ESC_Peaks_647
chr13	47855091	47856239	ESC_Peaks_648
chr13	48131646	48131937	ESC_Peaks_649
chr13	48236508	48236867	ESC_Peaks_650
chr13	48763895	48764129	ESC_Peaks_651
chr13	49420811	49421380	ESC_Peaks_652
chr13	50965689	50966096	ESC_Peaks_653
chr13	51023366	51023680	ESC_Peaks_654
chr13	51904981	51905791	ESC_Peaks_655
chr13	52004051	52004285	ESC_Peaks_656
chr13	52565267	52565594	ESC_Peaks_657
chr13	53196713	53197018	ESC_Peaks_658
chr13	54215785	54216441	ESC_Peaks_659
chr13	55189946	55190482	ESC_Peaks_660
chr13	55444797	55445260	ESC_Peaks_661
chr13	55592123	55592455	ESC_Peaks_662
chr13	56143070	56143614	ESC_Peaks_663
chr13	56653634	56653908	ESC_Peaks_664
chr13	59646869	59647313	ESC_Peaks_665
chr13	59770242	59770549	ESC_Peaks_666
chr13	63272167	63272693	ESC_Peaks_667
chr13	63272738	63273125	ESC_Peaks_668
chr13	63721520	63721744	ESC_Peaks_669
chr13	64422132	64422421	ESC_Peaks_670
chr13	67112055	67112399	ESC_Peaks_671
chr13	67269067	67269381	ESC_Peaks_672
chr13	67278447	67278669	ESC_Peaks_673
chr13	67500384	67500754	ESC_Peaks_674
chr13	67729022	67729380	ESC_Peaks_675
chr13	67743980	67744313	ESC_Peaks_676
chr13	68573093	68573387	ESC_Peaks_677
chr13	71017789	71018072	ESC_Peaks_678
chr13	73782403	73782886	ESC_Peaks_679
chr13	74399260	74399572	ESC_Peaks_680
chr13	74913684	74914077	ESC_Peaks_681
chr13	80885521	80885802	ESC_Peaks_682
chr13	80885898	80886476	ESC_Peaks_683
chr13	80962905	80963262	ESC_Peaks_684
chr13	81269059	81269383	ESC_Peaks_685
chr13	89726521	89726879	ESC_Peaks_686
chr13	91223532	91223995	ESC_Peaks_687
chr13	91370930	91371228	ESC_Peaks_688
chr13	95325699	95325936	ESC_Peaks_689
chr13	95531340	95531978	ESC_Peaks_690
chr13	95533548	95533859	ESC_Peaks_691
chr13	95534075	95534556	ESC_Peaks_692
chr13	97086453	97086669	ESC_Peaks_693
chr13	97282741	97283301	ESC_Peaks_694
chr13	97435889	97436254	ESC_Peaks_695
chr13	97496230	97496578	ESC_Peaks_696
chr13	97580074	97580628	ESC_Peaks_697
chr13	97782135	97782352	ESC_Peaks_698
chr13	99049789	99050003	ESC_Peaks_699
chr13	99090422	99090647	ESC_Peaks_700
chr13	99444342	99444837	ESC_Peaks_701
chr13	99556778	99557071	ESC_Peaks_702
chr13	101801330	101801739	ESC_Peaks_703
chr13	102895961	102896244	ESC_Peaks_704
chr13	103744692	103744994	ESC_Peaks_705
chr13	104539649	104539872	ESC_Peaks_706
chr13	109633056	109633300	ESC_Peaks_707
chr13	111553227	111553582	ESC_Peaks_708
chr13	111601398	111601704	ESC_Peaks_709
chr13	111703466	111703783	ESC_Peaks_710
chr13	111809508	111810038	ESC_Peaks_711
chr13	112354109	112354517	ESC_Peaks_712
chr13	112463839	112464223	ESC_Peaks_713
chr13	112518233	112518493	ESC_Peaks_714
chr13	112987529	112987799	ESC_Peaks_715
chr13	113561539	113561855	ESC_Peaks_716
chr13	116298783	116299080	ESC_Peaks_717
chr13	117216950	117217317	ESC_Peaks_718
chr13	118705759	118706290	ESC_Peaks_719
chr14	8403363	8403906	ESC_Peaks_720
chr14	9327390	9327694	ESC_Peaks_721
chr14	11324160	11324331	ESC_Peaks_722
chr14	11906294	11906584	ESC_Peaks_723
chr14	12283991	12284507	ESC_Peaks_724
chr14	13789993	13790322	ESC_Peaks_725
chr14	19994108	19994487	ESC_Peaks_726
chr14	20156039	20156374	ESC_Peaks_727
chr14	21486023	21486651	ESC_Peaks_728
chr14	21779137	21779363	ESC_Peaks_729
chr14	22783706	22783963	ESC_Peaks_730
chr14	24253648	24254276	ESC_Peaks_731
chr14	26669838	26670147	ESC_Peaks_732
chr14	27389818	27390102	ESC_Peaks_733
chr14	30479404	30479702	ESC_Peaks_734
chr14	30580016	30580378	ESC_Peaks_735
chr14	30606858	30607237	ESC_Peaks_736
chr14	31206731	31207025	ESC_Peaks_737
chr14	31916831	31917178	ESC_Peaks_738
chr14	34378515	34378962	ESC_Peaks_739
chr14	34549376	34549746	ESC_Peaks_740
chr14	41189527	41189875	ESC_Peaks_741
chr14	45445297	45445700	ESC_Peaks_742
chr14	45493921	45494197	ESC_Peaks_743
chr14	45529261	45529724	ESC_Peaks_744
chr14	47367559	47367889	ESC_Peaks_745
chr14	47560719	47561043	ESC_Peaks_746
chr14	47572902	47573218	ESC_Peaks_747
chr14	47825586	47825883	ESC_Peaks_748
chr14	48099141	48099466	ESC_Peaks_749
chr14	48653761	48654006	ESC_Peaks_750
chr14	48654944	48655431	ESC_Peaks_751
chr14	48700900	48701266	ESC_Peaks_752
chr14	48709424	48709704	ESC_Peaks_753
chr14	49128758	49129382	ESC_Peaks_754
chr14	49275276	49275854	ESC_Peaks_755
chr14	49362171	49362543	ESC_Peaks_756
chr14	50870250	50870709	ESC_Peaks_757
chr14	50920453	50920745	ESC_Peaks_758
chr14	50979606	50980056	ESC_Peaks_759
chr14	52022204	52022734	ESC_Peaks_760
chr14	54383538	54383943	ESC_Peaks_761
chr14	54426717	54426991	ESC_Peaks_762
chr14	55603961	55604449	ESC_Peaks_763
chr14	55815427	55815813	ESC_Peaks_764
chr14	56237555	56237892	ESC_Peaks_765
chr14	57881823	57882209	ESC_Peaks_766
chr14	59932381	59932803	ESC_Peaks_767
chr14	60654014	60654307	ESC_Peaks_768
chr14	60736744	60737164	ESC_Peaks_769
chr14	60836728	60837095	ESC_Peaks_770
chr14	61316844	61317200	ESC_Peaks_771
chr14	63458071	63458649	ESC_Peaks_772
chr14	63500201	63500613	ESC_Peaks_773
chr14	63501642	63502167	ESC_Peaks_774
chr14	64632980	64633232	ESC_Peaks_775
chr14	66910810	66911287	ESC_Peaks_776
chr14	67159911	67160311	ESC_Peaks_777
chr14	67838006	67838299	ESC_Peaks_778
chr14	68121546	68121837	ESC_Peaks_779
chr14	69830857	69831237	ESC_Peaks_780
chr14	70336251	70336768	ESC_Peaks_781
chr14	75178897	75179088	ESC_Peaks_782
chr14	76150948	76151397	ESC_Peaks_783
chr14	76387944	76388266	ESC_Peaks_784
chr14	76494813	76495379	ESC_Peaks_785
chr14	76515486	76515895	ESC_Peaks_786
chr14	77029678	77029965	ESC_Peaks_787
chr14	77250716	77251214	ESC_Peaks_788
chr14	78660760	78661032	ESC_Peaks_789
chr14	79109856	79110292	ESC_Peaks_790
chr14	79285436	79285999	ESC_Peaks_791
chr14	79537476	79537682	ESC_Peaks_792
chr14	83008664	83008941	ESC_Peaks_793
chr14	86396048	86396473	ESC_Peaks_794
chr14	87044461	87044850	ESC_Peaks_795
chr14	94799202	94799615	ESC_Peaks_796
chr14	99339576	99340584	ESC_Peaks_797
chr14	99354064	99354379	ESC_Peaks_798
chr14	99713472	99713815	ESC_Peaks_799
chr14	100284433	100284720	ESC_Peaks_800
chr14	103729011	103729304	ESC_Peaks_801
chr14	105854000	105854369	ESC_Peaks_802
chr14	105859037	105859765	ESC_Peaks_803
chr14	105860982	105861270	ESC_Peaks_804
chr14	105897814	105898099	ESC_Peaks_805
chr14	105900794	105901211	ESC_Peaks_806
chr14	105920769	105921254	ESC_Peaks_807
chr14	111429509	111429797	ESC_Peaks_808
chr14	111971854	111972305	ESC_Peaks_809
chr14	114335235	114335510	ESC_Peaks_810
chr14	117768928	117769166	ESC_Peaks_811
chr14	118751120	118751610	ESC_Peaks_812
chr14	120245176	120245435	ESC_Peaks_813
chr14	120508709	120509333	ESC_Peaks_814
chr14	121675233	121675520	ESC_Peaks_815
chr14	121931584	121932008	ESC_Peaks_816
chr14	122280755	122281194	ESC_Peaks_817
chr14	123587411	123587648	ESC_Peaks_818
chr15	6570890	6571242	ESC_Peaks_819
chr15	7115278	7115762	ESC_Peaks_820
chr15	7116752	7117170	ESC_Peaks_821
chr15	8697936	8698326	ESC_Peaks_822
chr15	10708628	10708889	ESC_Peaks_823
chr15	10981396	10981960	ESC_Peaks_824
chr15	12038422	12038691	ESC_Peaks_825
chr15	12202498	12202930	ESC_Peaks_826
chr15	22969412	22969634	ESC_Peaks_827
chr15	25602275	25602635	ESC_Peaks_828
chr15	25754172	25754626	ESC_Peaks_829
chr15	25773935	25774130	ESC_Peaks_830
chr15	26308547	26308842	ESC_Peaks_831
chr15	30383080	30383395	ESC_Peaks_832
chr15	31176657	31176905	ESC_Peaks_833
chr15	31453370	31453700	ESC_Peaks_834
chr15	31510544	31510936	ESC_Peaks_835
chr15	34041669	34041963	ESC_Peaks_836
chr15	36608932	36609431	ESC_Peaks_837
chr15	37070176	37070626	ESC_Peaks_838
chr15	38077535	38078452	ESC_Peaks_839
chr15	38470182	38470869	ESC_Peaks_840
chr15	38570216	38570526	ESC_Peaks_841
chr15	39767851	39768250	ESC_Peaks_842
chr15	39780638	39781034	ESC_Peaks_843
chr15	40018460	40018824	ESC_Peaks_844
chr15	41741825	41742177	ESC_Peaks_845
chr15	50900383	50901081	ESC_Peaks_846
chr15	51592166	51592518	ESC_Peaks_847
chr15	52967877	52968299	ESC_Peaks_848
chr15	55346818	55347096	ESC_Peaks_849
chr15	56742673	56743104	ESC_Peaks_850
chr15	61984187	61984529	ESC_Peaks_851
chr15	62010711	62011174	ESC_Peaks_852
chr15	62092658	62093026	ESC_Peaks_853
chr15	63997933	63998304	ESC_Peaks_854
chr15	66911090	66911580	ESC_Peaks_855
chr15	73703845	73704263	ESC_Peaks_856
chr15	75880659	75881036	ESC_Peaks_857
chr15	75890228	75890691	ESC_Peaks_858
chr15	75894186	75894732	ESC_Peaks_859
chr15	76083601	76084036	ESC_Peaks_860
chr15	76307023	76307797	ESC_Peaks_861
chr15	76543676	76543992	ESC_Peaks_862
chr15	76625840	76626295	ESC_Peaks_863
chr15	76669655	76670257	ESC_Peaks_864
chr15	77080642	77081119	ESC_Peaks_865
chr15	77163011	77163219	ESC_Peaks_866
chr15	77355204	77355668	ESC_Peaks_867
chr15	77356086	77356526	ESC_Peaks_868
chr15	77822185	77822562	ESC_Peaks_869
chr15	77928717	77929166	ESC_Peaks_870
chr15	78581367	78581728	ESC_Peaks_871
chr15	78778564	78779000	ESC_Peaks_872
chr15	78896026	78896570	ESC_Peaks_873
chr15	79141041	79141534	ESC_Peaks_874
chr15	79347434	79347886	ESC_Peaks_875
chr15	80011071	80011565	ESC_Peaks_876
chr15	80012724	80013299	ESC_Peaks_877
chr15	80219302	80219692	ESC_Peaks_878
chr15	80255219	80255670	ESC_Peaks_879
chr15	80812158	80812435	ESC_Peaks_880
chr15	80850042	80850385	ESC_Peaks_881
chr15	81370365	81370724	ESC_Peaks_882
chr15	81518049	81518351	ESC_Peaks_883
chr15	82177872	82178261	ESC_Peaks_884
chr15	82901263	82901591	ESC_Peaks_885
chr15	83244333	83244744	ESC_Peaks_886
chr15	84232647	84232944	ESC_Peaks_887
chr15	84665588	84666015	ESC_Peaks_888
chr15	84714687	84715172	ESC_Peaks_889
chr15	88708852	88709388	ESC_Peaks_890
chr15	88837392	88837928	ESC_Peaks_891
chr15	88837941	88838452	ESC_Peaks_892
chr15	88867261	88868297	ESC_Peaks_893
chr15	89178902	89179175	ESC_Peaks_894
chr15	89480561	89481105	ESC_Peaks_895
chr15	91284496	91284818	ESC_Peaks_896
chr15	92521789	92522105	ESC_Peaks_897
chr15	94589776	94590323	ESC_Peaks_898
chr15	96240050	96240295	ESC_Peaks_899
chr15	97593560	97594451	ESC_Peaks_900
chr15	97999539	98000063	ESC_Peaks_901
chr15	98988611	98989061	ESC_Peaks_902
chr15	100292267	100292786	ESC_Peaks_903
chr15	100627699	100628123	ESC_Peaks_904
chr15	101082170	101082557	ESC_Peaks_905
chr15	101092079	101092528	ESC_Peaks_906
chr15	101098021	101098369	ESC_Peaks_907
chr15	101145597	101145847	ESC_Peaks_908
chr15	101148127	101148410	ESC_Peaks_909
chr15	101228077	101228419	ESC_Peaks_910
chr15	102178275	102178648	ESC_Peaks_911
chr15	102399393	102399803	ESC_Peaks_912
chr15	102510425	102510940	ESC_Peaks_913
chr15	102931437	102932152	ESC_Peaks_914
chr15	103421706	103421954	ESC_Peaks_915
chr15	103519831	103520434	ESC_Peaks_916
chr15	103522355	103522922	ESC_Peaks_917
chr16	3975772	3976127	ESC_Peaks_918
chr16	4683576	4683978	ESC_Peaks_919
chr16	5255915	5256557	ESC_Peaks_920
chr16	5473646	5473905	ESC_Peaks_921
chr16	8728226	8728534	ESC_Peaks_922
chr16	8829772	8830260	ESC_Peaks_923
chr16	9149697	9150399	ESC_Peaks_924
chr16	9810817	9811075	ESC_Peaks_925
chr16	10957741	10958215	ESC_Peaks_926
chr16	11007990	11008570	ESC_Peaks_927
chr16	11389398	11389756	ESC_Peaks_928
chr16	11526410	11526736	ESC_Peaks_929
chr16	13750024	13750417	ESC_Peaks_930
chr16	13780326	13780833	ESC_Peaks_931
chr16	16896324	16896776	ESC_Peaks_932
chr16	17201328	17201730	ESC_Peaks_933
chr16	18088946	18089483	ESC_Peaks_934
chr16	19763315	19763510	ESC_Peaks_935
chr16	20097994	20098498	ESC_Peaks_936
chr16	20498636	20499106	ESC_Peaks_937
chr16	20540431	20540776	ESC_Peaks_938
chr16	20730140	20730743	ESC_Peaks_939
chr16	21485744	21486080	ESC_Peaks_940
chr16	21996825	21997331	ESC_Peaks_941
chr16	22075979	22076375	ESC_Peaks_942
chr16	22405984	22406637	ESC_Peaks_943
chr16	22411942	22412107	ESC_Peaks_944
chr16	22844345	22844850	ESC_Peaks_945
chr16	23988468	23989084	ESC_Peaks_946
chr16	24392572	24393115	ESC_Peaks_947
chr16	25041782	25042185	ESC_Peaks_948
chr16	28841165	28841466	ESC_Peaks_949
chr16	29683181	29683374	ESC_Peaks_950
chr16	30045544	30046110	ESC_Peaks_951
chr16	30063107	30063423	ESC_Peaks_952
chr16	30510396	30510774	ESC_Peaks_953
chr16	30693876	30694152	ESC_Peaks_954
chr16	30821303	30821753	ESC_Peaks_955
chr16	31326806	31327170	ESC_Peaks_956
chr16	32113519	32113996	ESC_Peaks_957
chr16	32124123	32124362	ESC_Peaks_958
chr16	32511003	32511357	ESC_Peaks_959
chr16	32513483	32514004	ESC_Peaks_960
chr16	32877382	32877857	ESC_Peaks_961
chr16	35145999	35146377	ESC_Peaks_962
chr16	35868899	35869316	ESC_Peaks_963
chr16	36707790	36708508	ESC_Peaks_964
chr16	37655795	37656221	ESC_Peaks_965
chr16	38445134	38445432	ESC_Peaks_966
chr16	42575612	42576020	ESC_Peaks_967
chr16	42770115	42770581	ESC_Peaks_968
chr16	44139537	44139804	ESC_Peaks_969
chr16	44280794	44281272	ESC_Peaks_970
chr16	48435459	48435760	ESC_Peaks_971
chr16	48613759	48614245	ESC_Peaks_972
chr16	50528714	50529088	ESC_Peaks_973
chr16	52450230	52450431	ESC_Peaks_974
chr16	55813919	55814296	ESC_Peaks_975
chr16	55822035	55822486	ESC_Peaks_976
chr16	55888580	55888873	ESC_Peaks_977
chr16	59545291	59545670	ESC_Peaks_978
chr16	62854080	62854453	ESC_Peaks_979
chr16	64873664	64874155	ESC_Peaks_980
chr16	72649417	72649654	ESC_Peaks_981
chr16	72893841	72894191	ESC_Peaks_982
chr16	73011226	73011828	ESC_Peaks_983
chr16	76319781	76320107	ESC_Peaks_984
chr16	78490255	78490688	ESC_Peaks_985
chr16	82863901	82864226	ESC_Peaks_986
chr16	84769148	84769684	ESC_Peaks_987
chr16	89861421	89861892	ESC_Peaks_988
chr16	90158358	90158635	ESC_Peaks_989
chr16	91428157	91428515	ESC_Peaks_990
chr16	92697205	92697489	ESC_Peaks_991
chr16	93533184	93533645	ESC_Peaks_992
chr16	93794776	93795193	ESC_Peaks_993
chr16	93816405	93816922	ESC_Peaks_994
chr16	93907773	93908052	ESC_Peaks_995
chr16	93975669	93975982	ESC_Peaks_996
chr16	93985303	93985644	ESC_Peaks_997
chr16	94533772	94534044	ESC_Peaks_998
chr16	94724188	94724573	ESC_Peaks_999
chr17	3084040	3084550	ESC_Peaks_1000
chr17	5052070	5052467	ESC_Peaks_1001
chr17	6739261	6739596	ESC_Peaks_1002
chr17	6777510	6778011	ESC_Peaks_1003
chr17	8371735	8372182	ESC_Peaks_1004
chr17	9691326	9691697	ESC_Peaks_1005
chr17	9913293	9913578	ESC_Peaks_1006
chr17	9921434	9921830	ESC_Peaks_1007
chr17	10078854	10079297	ESC_Peaks_1008
chr17	10342101	10342601	ESC_Peaks_1009
chr17	10366101	10366876	ESC_Peaks_1010
chr17	10432634	10433337	ESC_Peaks_1011
chr17	10702935	10703248	ESC_Peaks_1012
chr17	12195143	12195565	ESC_Peaks_1013
chr17	13659965	13660304	ESC_Peaks_1014
chr17	15207146	15207543	ESC_Peaks_1015
chr17	15564195	15564487	ESC_Peaks_1016
chr17	15990282	15990687	ESC_Peaks_1017
chr17	17373870	17374252	ESC_Peaks_1018
chr17	21567041	21567338	ESC_Peaks_1019
chr17	22365014	22365304	ESC_Peaks_1020
chr17	23600615	23601102	ESC_Peaks_1021
chr17	23603148	23603382	ESC_Peaks_1022
chr17	24161497	24161870	ESC_Peaks_1023
chr17	24163625	24163862	ESC_Peaks_1024
chr17	26110659	26111025	ESC_Peaks_1025
chr17	26596623	26597245	ESC_Peaks_1026
chr17	26715429	26715900	ESC_Peaks_1027
chr17	27048087	27048373	ESC_Peaks_1028
chr17	27443440	27443752	ESC_Peaks_1029
chr17	27636730	27637031	ESC_Peaks_1030
chr17	27994062	27994830	ESC_Peaks_1031
chr17	28000857	28001291	ESC_Peaks_1032
chr17	28255761	28256146	ESC_Peaks_1033
chr17	28463597	28463861	ESC_Peaks_1034
chr17	28677080	28677280	ESC_Peaks_1035
chr17	28784863	28785278	ESC_Peaks_1036
chr17	28857363	28857782	ESC_Peaks_1037
chr17	29007851	29008506	ESC_Peaks_1038
chr17	29056625	29057227	ESC_Peaks_1039
chr17	29161443	29161881	ESC_Peaks_1040
chr17	29399309	29399590	ESC_Peaks_1041
chr17	29451074	29451672	ESC_Peaks_1042
chr17	29465427	29465704	ESC_Peaks_1043
chr17	29490078	29490366	ESC_Peaks_1044
chr17	29637990	29638361	ESC_Peaks_1045
chr17	30594917	30595276	ESC_Peaks_1046
chr17	30878566	30879162	ESC_Peaks_1047
chr17	31057130	31057522	ESC_Peaks_1048
chr17	31282239	31282657	ESC_Peaks_1049
chr17	31385232	31385580	ESC_Peaks_1050
chr17	31535875	31536207	ESC_Peaks_1051
chr17	31806200	31806491	ESC_Peaks_1052
chr17	31808012	31808585	ESC_Peaks_1053
chr17	33826865	33827155	ESC_Peaks_1054
chr17	33901044	33901327	ESC_Peaks_1055
chr17	34836575	34837112	ESC_Peaks_1056
chr17	34910958	34911272	ESC_Peaks_1057
chr17	35051662	35052112	ESC_Peaks_1058
chr17	35076645	35077162	ESC_Peaks_1059
chr17	35503855	35504252	ESC_Peaks_1060
chr17	35504660	35505244	ESC_Peaks_1061
chr17	35569220	35569460	ESC_Peaks_1062
chr17	35823094	35823525	ESC_Peaks_1063
chr17	35939143	35939475	ESC_Peaks_1064
chr17	36026632	36026940	ESC_Peaks_1065
chr17	37078953	37079507	ESC_Peaks_1066
chr17	37079980	37080605	ESC_Peaks_1067
chr17	43044467	43044786	ESC_Peaks_1068
chr17	43077177	43077435	ESC_Peaks_1069
chr17	43148107	43148421	ESC_Peaks_1070
chr17	45458684	45459401	ESC_Peaks_1071
chr17	45474583	45475016	ESC_Peaks_1072
chr17	45574511	45574894	ESC_Peaks_1073
chr17	45601816	45602392	ESC_Peaks_1074
chr17	45607085	45607561	ESC_Peaks_1075
chr17	45629756	45630133	ESC_Peaks_1076
chr17	46927036	46927456	ESC_Peaks_1077
chr17	47511243	47511749	ESC_Peaks_1078
chr17	47513421	47513817	ESC_Peaks_1079
chr17	47521585	47522018	ESC_Peaks_1080
chr17	47571490	47571930	ESC_Peaks_1081
chr17	47648960	47649305	ESC_Peaks_1082
chr17	47710136	47710389	ESC_Peaks_1083
chr17	47735710	47736090	ESC_Peaks_1084
chr17	47738008	47738293	ESC_Peaks_1085
chr17	47739177	47739867	ESC_Peaks_1086
chr17	47875575	47876015	ESC_Peaks_1087
chr17	47904397	47904912	ESC_Peaks_1088
chr17	47921116	47921519	ESC_Peaks_1089
chr17	47923702	47923902	ESC_Peaks_1090
chr17	47953185	47953629	ESC_Peaks_1091
chr17	48373165	48373450	ESC_Peaks_1092
chr17	48432348	48432599	ESC_Peaks_1093
chr17	49033298	49033669	ESC_Peaks_1094
chr17	50246346	50246793	ESC_Peaks_1095
chr17	56008286	56008603	ESC_Peaks_1096
chr17	56348225	56348506	ESC_Peaks_1097
chr17	56751999	56752422	ESC_Peaks_1098
chr17	56758279	56758581	ESC_Peaks_1099
chr17	63533024	63533535	ESC_Peaks_1100
chr17	63849628	63849897	ESC_Peaks_1101
chr17	65613868	65614238	ESC_Peaks_1102
chr17	65663798	65664086	ESC_Peaks_1103
chr17	65877114	65877404	ESC_Peaks_1104
chr17	66439437	66439880	ESC_Peaks_1105
chr17	66479758	66480683	ESC_Peaks_1106
chr17	67693900	67694331	ESC_Peaks_1107
chr17	69221926	69222368	ESC_Peaks_1108
chr17	69277305	69277742	ESC_Peaks_1109
chr17	70828554	70828998	ESC_Peaks_1110
chr17	70866475	70866976	ESC_Peaks_1111
chr17	70900474	70901076	ESC_Peaks_1112
chr17	70916437	70916810	ESC_Peaks_1113
chr17	72914968	72915199	ESC_Peaks_1114
chr17	74047451	74047871	ESC_Peaks_1115
chr17	78408268	78408622	ESC_Peaks_1116
chr17	79969533	79970189	ESC_Peaks_1117
chr17	80499226	80499428	ESC_Peaks_1118
chr17	80575051	80575447	ESC_Peaks_1119
chr17	80809299	80809754	ESC_Peaks_1120
chr17	81000996	81001349	ESC_Peaks_1121
chr17	83166612	83167107	ESC_Peaks_1122
chr17	84003733	84004176	ESC_Peaks_1123
chr17	84177626	84177926	ESC_Peaks_1124
chr17	84480044	84480451	ESC_Peaks_1125
chr17	85101830	85102247	ESC_Peaks_1126
chr17	86724904	86725366	ESC_Peaks_1127
chr17	87179159	87179677	ESC_Peaks_1128
chr17	87446684	87446972	ESC_Peaks_1129
chr17	87672220	87672740	ESC_Peaks_1130
chr17	88346850	88347341	ESC_Peaks_1131
chr17	88510891	88511550	ESC_Peaks_1132
chr17	89934025	89934336	ESC_Peaks_1133
chr18	4295795	4296135	ESC_Peaks_1134
chr18	6275420	6275979	ESC_Peaks_1135
chr18	6764754	6765095	ESC_Peaks_1136
chr18	8478245	8478531	ESC_Peaks_1137
chr18	8605864	8606332	ESC_Peaks_1138
chr18	9214786	9215300	ESC_Peaks_1139
chr18	11211542	11211888	ESC_Peaks_1140
chr18	11486929	11487349	ESC_Peaks_1141
chr18	12941662	12942217	ESC_Peaks_1142
chr18	13034515	13034885	ESC_Peaks_1143
chr18	13590442	13590601	ESC_Peaks_1144
chr18	14782916	14783270	ESC_Peaks_1145
chr18	16665608	16665916	ESC_Peaks_1146
chr18	20190834	20191102	ESC_Peaks_1147
chr18	20589874	20590206	ESC_Peaks_1148
chr18	20943637	20943944	ESC_Peaks_1149
chr18	24116681	24116968	ESC_Peaks_1150
chr18	24512859	24513222	ESC_Peaks_1151
chr18	24710179	24710524	ESC_Peaks_1152
chr18	30121585	30122074	ESC_Peaks_1153
chr18	34815307	34815736	ESC_Peaks_1154
chr18	35022488	35022871	ESC_Peaks_1155
chr18	35043190	35043861	ESC_Peaks_1156
chr18	35070793	35070987	ESC_Peaks_1157
chr18	35664724	35665097	ESC_Peaks_1158
chr18	35757429	35757764	ESC_Peaks_1159
chr18	35812943	35813233	ESC_Peaks_1160
chr18	35814672	35815359	ESC_Peaks_1161
chr18	35873686	35874221	ESC_Peaks_1162
chr18	36255010	36255270	ESC_Peaks_1163
chr18	36415389	36415901	ESC_Peaks_1164
chr18	36559982	36560440	ESC_Peaks_1165
chr18	36760051	36760314	ESC_Peaks_1166
chr18	37771445	37771814	ESC_Peaks_1167
chr18	37859938	37860415	ESC_Peaks_1168
chr18	37880066	37880524	ESC_Peaks_1169
chr18	38056418	38056690	ESC_Peaks_1170
chr18	38148799	38149254	ESC_Peaks_1171
chr18	38384173	38384951	ESC_Peaks_1172
chr18	38524174	38524486	ESC_Peaks_1173
chr18	38635894	38636309	ESC_Peaks_1174
chr18	40307874	40308475	ESC_Peaks_1175
chr18	41779840	41780074	ESC_Peaks_1176
chr18	41886833	41887166	ESC_Peaks_1177
chr18	46597582	46597949	ESC_Peaks_1178
chr18	46977406	46977647	ESC_Peaks_1179
chr18	47569409	47569995	ESC_Peaks_1180
chr18	47703726	47704176	ESC_Peaks_1181
chr18	49979157	49979635	ESC_Peaks_1182
chr18	54667539	54668009	ESC_Peaks_1183
chr18	54827887	54828316	ESC_Peaks_1184
chr18	54990983	54991308	ESC_Peaks_1185
chr18	56677514	56677995	ESC_Peaks_1186
chr18	57470782	57471183	ESC_Peaks_1187
chr18	60651954	60652304	ESC_Peaks_1188
chr18	61013952	61014442	ESC_Peaks_1189
chr18	61216875	61217309	ESC_Peaks_1190
chr18	61397843	61398135	ESC_Peaks_1191
chr18	61627945	61628668	ESC_Peaks_1192
chr18	62977687	62977940	ESC_Peaks_1193
chr18	64170207	64170458	ESC_Peaks_1194
chr18	65397776	65398147	ESC_Peaks_1195
chr18	65507002	65507528	ESC_Peaks_1196
chr18	65565688	65565980	ESC_Peaks_1197
chr18	65587073	65587583	ESC_Peaks_1198
chr18	65622520	65622895	ESC_Peaks_1199
chr18	65624870	65625297	ESC_Peaks_1200
chr18	65925044	65925651	ESC_Peaks_1201
chr18	66002771	66003152	ESC_Peaks_1202
chr18	69344160	69344535	ESC_Peaks_1203
chr18	69782029	69782473	ESC_Peaks_1204
chr18	69925313	69925671	ESC_Peaks_1205
chr18	74215965	74216438	ESC_Peaks_1206
chr18	74906804	74907020	ESC_Peaks_1207
chr18	75117944	75118293	ESC_Peaks_1208
chr18	75210234	75210675	ESC_Peaks_1209
chr18	75309694	75310163	ESC_Peaks_1210
chr18	75344852	75345525	ESC_Peaks_1211
chr18	75360761	75361317	ESC_Peaks_1212
chr18	75464712	75465285	ESC_Peaks_1213
chr18	75531487	75532028	ESC_Peaks_1214
chr18	75579269	75579816	ESC_Peaks_1215
chr18	75584952	75585380	ESC_Peaks_1216
chr18	75586092	75586293	ESC_Peaks_1217
chr18	76084227	76084624	ESC_Peaks_1218
chr18	79850708	79851014	ESC_Peaks_1219
chr18	81618222	81618556	ESC_Peaks_1220
chr18	82933425	82933943	ESC_Peaks_1221
chr18	84934236	84934814	ESC_Peaks_1222
chr19	3842481	3842752	ESC_Peaks_1223
chr19	3912767	3913197	ESC_Peaks_1224
chr19	4059330	4059755	ESC_Peaks_1225
chr19	4810215	4810902	ESC_Peaks_1226
chr19	5473665	5474029	ESC_Peaks_1227
chr19	5637343	5637981	ESC_Peaks_1228
chr19	5802552	5802745	ESC_Peaks_1229
chr19	5803468	5803901	ESC_Peaks_1230
chr19	5846510	5847078	ESC_Peaks_1231
chr19	5849046	5849535	ESC_Peaks_1232
chr19	7341763	7342060	ESC_Peaks_1233
chr19	7607950	7608389	ESC_Peaks_1234
chr19	8953516	8953987	ESC_Peaks_1235
chr19	10013009	10013778	ESC_Peaks_1236
chr19	10231736	10232274	ESC_Peaks_1237
chr19	10605174	10605723	ESC_Peaks_1238
chr19	12485181	12485496	ESC_Peaks_1239
chr19	15942901	15943255	ESC_Peaks_1240
chr19	16491397	16492155	ESC_Peaks_1241
chr19	17472799	17473173	ESC_Peaks_1242
chr19	18607909	18608247	ESC_Peaks_1243
chr19	20923788	20924201	ESC_Peaks_1244
chr19	21767659	21768104	ESC_Peaks_1245
chr19	21817980	21818464	ESC_Peaks_1246
chr19	21952616	21952974	ESC_Peaks_1247
chr19	22823728	22824097	ESC_Peaks_1248
chr19	23075813	23076212	ESC_Peaks_1249
chr19	23095064	23095360	ESC_Peaks_1250
chr19	23133147	23133507	ESC_Peaks_1251
chr19	23136471	23136794	ESC_Peaks_1252
chr19	23467935	23468222	ESC_Peaks_1253
chr19	24031275	24031598	ESC_Peaks_1254
chr19	24223815	24224207	ESC_Peaks_1255
chr19	24224743	24225297	ESC_Peaks_1256
chr19	25228114	25228340	ESC_Peaks_1257
chr19	25479231	25479585	ESC_Peaks_1258
chr19	28182561	28183279	ESC_Peaks_1259
chr19	29285504	29285787	ESC_Peaks_1260
chr19	29948657	29948861	ESC_Peaks_1261
chr19	30213926	30214309	ESC_Peaks_1262
chr19	32242198	32242591	ESC_Peaks_1263
chr19	32956063	32956441	ESC_Peaks_1264
chr19	32963873	32964256	ESC_Peaks_1265
chr19	34655328	34655676	ESC_Peaks_1266
chr19	36817903	36818454	ESC_Peaks_1267
chr19	37351975	37352190	ESC_Peaks_1268
chr19	37920982	37921657	ESC_Peaks_1269
chr19	38320871	38321061	ESC_Peaks_1270
chr19	38928843	38929103	ESC_Peaks_1271
chr19	40935998	40936572	ESC_Peaks_1272
chr19	41445736	41446104	ESC_Peaks_1273
chr19	41831872	41832160	ESC_Peaks_1274
chr19	41980469	41980828	ESC_Peaks_1275
chr19	41981206	41981509	ESC_Peaks_1276
chr19	42136111	42136466	ESC_Peaks_1277
chr19	42321717	42322463	ESC_Peaks_1278
chr19	42322475	42322896	ESC_Peaks_1279
chr19	42358524	42358939	ESC_Peaks_1280
chr19	42891660	42891950	ESC_Peaks_1281
chr19	43472400	43472643	ESC_Peaks_1282
chr19	43520439	43520718	ESC_Peaks_1283
chr19	43879623	43880047	ESC_Peaks_1284
chr19	44029053	44029318	ESC_Peaks_1285
chr19	44265995	44266351	ESC_Peaks_1286
chr19	44280847	44281375	ESC_Peaks_1287
chr19	44284147	44284608	ESC_Peaks_1288
chr19	44408116	44408466	ESC_Peaks_1289
chr19	44719215	44719534	ESC_Peaks_1290
chr19	45143665	45144083	ESC_Peaks_1291
chr19	45937605	45937933	ESC_Peaks_1292
chr19	46057008	46057504	ESC_Peaks_1293
chr19	47149820	47150245	ESC_Peaks_1294
chr19	47625262	47625669	ESC_Peaks_1295
chr19	47755683	47756021	ESC_Peaks_1296
chr19	48649843	48650284	ESC_Peaks_1297
chr19	53023150	53023556	ESC_Peaks_1298
chr19	53064433	53064704	ESC_Peaks_1299
chr19	53449506	53450116	ESC_Peaks_1300
chr19	53557229	53557547	ESC_Peaks_1301
chr19	55556167	55556595	ESC_Peaks_1302
chr19	55640184	55640687	ESC_Peaks_1303
chr19	56419613	56419857	ESC_Peaks_1304
chr19	56509606	56510113	ESC_Peaks_1305
chr19	57200363	57200816	ESC_Peaks_1306
chr19	58063027	58063321	ESC_Peaks_1307
chr2	3954224	3954505	ESC_Peaks_1308
chr2	4918813	4919231	ESC_Peaks_1309
chr2	10334343	10334635	ESC_Peaks_1310
chr2	11535330	11535623	ESC_Peaks_1311
chr2	13572079	13572654	ESC_Peaks_1312
chr2	17097676	17098049	ESC_Peaks_1313
chr2	20526220	20526809	ESC_Peaks_1314
chr2	20550029	20550291	ESC_Peaks_1315
chr2	20587680	20588013	ESC_Peaks_1316
chr2	20669443	20669896	ESC_Peaks_1317
chr2	22895378	22895666	ESC_Peaks_1318
chr2	26493425	26493744	ESC_Peaks_1319
chr2	27373341	27373677	ESC_Peaks_1320
chr2	28607312	28607799	ESC_Peaks_1321
chr2	29120893	29121335	ESC_Peaks_1322
chr2	29483377	29483737	ESC_Peaks_1323
chr2	29629374	29629713	ESC_Peaks_1324
chr2	29708286	29708528	ESC_Peaks_1325
chr2	29729501	29729845	ESC_Peaks_1326
chr2	29744281	29744614	ESC_Peaks_1327
chr2	30166626	30167020	ESC_Peaks_1328
chr2	30441631	30442083	ESC_Peaks_1329
chr2	30595176	30595598	ESC_Peaks_1330
chr2	30759988	30760397	ESC_Peaks_1331
chr2	30884839	30885259	ESC_Peaks_1332
chr2	31785122	31785491	ESC_Peaks_1333
chr2	32162739	32163088	ESC_Peaks_1334
chr2	32167142	32167518	ESC_Peaks_1335
chr2	32174318	32174864	ESC_Peaks_1336
chr2	32908461	32908864	ESC_Peaks_1337
chr2	33439487	33439983	ESC_Peaks_1338
chr2	33665684	33666069	ESC_Peaks_1339
chr2	33666340	33666875	ESC_Peaks_1340
chr2	35613886	35614274	ESC_Peaks_1341
chr2	36049249	36049602	ESC_Peaks_1342
chr2	38591780	38592152	ESC_Peaks_1343
chr2	40910851	40911374	ESC_Peaks_1344
chr2	43365797	43366247	ESC_Peaks_1345
chr2	48949312	48949652	ESC_Peaks_1346
chr2	51007764	51007970	ESC_Peaks_1347
chr2	51048796	51048989	ESC_Peaks_1348
chr2	51139670	51140045	ESC_Peaks_1349
chr2	52013351	52013650	ESC_Peaks_1350
chr2	52071316	52071750	ESC_Peaks_1351
chr2	52958979	52959704	ESC_Peaks_1352
chr2	59171559	59171875	ESC_Peaks_1353
chr2	60211891	60212176	ESC_Peaks_1354
chr2	65421245	65421639	ESC_Peaks_1355
chr2	70278571	70278970	ESC_Peaks_1356
chr2	71652159	71652664	ESC_Peaks_1357
chr2	71655721	71656463	ESC_Peaks_1358
chr2	71704326	71704601	ESC_Peaks_1359
chr2	71750247	71750537	ESC_Peaks_1360
chr2	71813807	71814144	ESC_Peaks_1361
chr2	71867458	71867898	ESC_Peaks_1362
chr2	75633485	75633708	ESC_Peaks_1363
chr2	75682812	75683285	ESC_Peaks_1364
chr2	75698966	75699169	ESC_Peaks_1365
chr2	76648011	76648216	ESC_Peaks_1366
chr2	77814637	77814873	ESC_Peaks_1367
chr2	84518732	84518998	ESC_Peaks_1368
chr2	84762239	84762644	ESC_Peaks_1369
chr2	84774794	84775194	ESC_Peaks_1370
chr2	84839221	84839520	ESC_Peaks_1371
chr2	87481237	87481725	ESC_Peaks_1372
chr2	90846809	90847071	ESC_Peaks_1373
chr2	91439356	91439658	ESC_Peaks_1374
chr2	91932516	91932755	ESC_Peaks_1375
chr2	92143962	92144319	ESC_Peaks_1376
chr2	92805658	92806240	ESC_Peaks_1377
chr2	93927648	93928309	ESC_Peaks_1378
chr2	103310629	103311124	ESC_Peaks_1379
chr2	104588612	104588850	ESC_Peaks_1380
chr2	109311369	109311805	ESC_Peaks_1381
chr2	113440261	113441081	ESC_Peaks_1382
chr2	115723272	115723694	ESC_Peaks_1383
chr2	116060259	116060471	ESC_Peaks_1384
chr2	116942355	116942833	ESC_Peaks_1385
chr2	117194290	117194609	ESC_Peaks_1386
chr2	119236847	119237246	ESC_Peaks_1387
chr2	119707560	119707970	ESC_Peaks_1388
chr2	119789931	119790390	ESC_Peaks_1389
chr2	119882951	119883315	ESC_Peaks_1390
chr2	121575921	121576234	ESC_Peaks_1391
chr2	123385570	123386006	ESC_Peaks_1392
chr2	125135779	125136102	ESC_Peaks_1393
chr2	126552381	126552767	ESC_Peaks_1394
chr2	126876155	126876515	ESC_Peaks_1395
chr2	127182652	127183070	ESC_Peaks_1396
chr2	127839384	127839913	ESC_Peaks_1397
chr2	128240442	128240919	ESC_Peaks_1398
chr2	129068665	129069012	ESC_Peaks_1399
chr2	129419387	129419757	ESC_Peaks_1400
chr2	129883322	129883807	ESC_Peaks_1401
chr2	131255620	131256086	ESC_Peaks_1402
chr2	131847386	131847904	ESC_Peaks_1403
chr2	132206287	132206653	ESC_Peaks_1404
chr2	132578078	132578579	ESC_Peaks_1405
chr2	132649467	132649769	ESC_Peaks_1406
chr2	133162042	133162385	ESC_Peaks_1407
chr2	135073062	135073405	ESC_Peaks_1408
chr2	135559226	135559730	ESC_Peaks_1409
chr2	137099496	137099713	ESC_Peaks_1410
chr2	141264565	141264942	ESC_Peaks_1411
chr2	141266702	141267132	ESC_Peaks_1412
chr2	144077687	144078154	ESC_Peaks_1413
chr2	146624165	146624515	ESC_Peaks_1414
chr2	146630974	146631671	ESC_Peaks_1415
chr2	147033205	147033524	ESC_Peaks_1416
chr2	148672537	148672747	ESC_Peaks_1417
chr2	149983045	149983669	ESC_Peaks_1418
chr2	150311318	150311559	ESC_Peaks_1419
chr2	150362469	150362969	ESC_Peaks_1420
chr2	150657336	150657851	ESC_Peaks_1421
chr2	150659986	150660491	ESC_Peaks_1422
chr2	150909516	150909895	ESC_Peaks_1423
chr2	152012497	152013031	ESC_Peaks_1424
chr2	152177287	152177795	ESC_Peaks_1425
chr2	152180159	152180624	ESC_Peaks_1426
chr2	152345410	152345821	ESC_Peaks_1427
chr2	152349704	152350181	ESC_Peaks_1428
chr2	152728203	152728583	ESC_Peaks_1429
chr2	152741484	152741730	ESC_Peaks_1430
chr2	153168064	153168585	ESC_Peaks_1431
chr2	153345408	153345669	ESC_Peaks_1432
chr2	153346474	153346764	ESC_Peaks_1433
chr2	154407094	154407579	ESC_Peaks_1434
chr2	154423574	154423826	ESC_Peaks_1435
chr2	154426605	154427070	ESC_Peaks_1436
chr2	154427840	154428444	ESC_Peaks_1437
chr2	155472571	155472813	ESC_Peaks_1438
chr2	156111705	156112154	ESC_Peaks_1439
chr2	156199969	156200306	ESC_Peaks_1440
chr2	157376412	157376892	ESC_Peaks_1441
chr2	157418118	157419211	ESC_Peaks_1442
chr2	158152780	158153078	ESC_Peaks_1443
chr2	158154105	158154341	ESC_Peaks_1444
chr2	158178211	158178646	ESC_Peaks_1445
chr2	159012641	159013119	ESC_Peaks_1446
chr2	162244702	162245069	ESC_Peaks_1447
chr2	163051498	163051908	ESC_Peaks_1448
chr2	163051964	163052672	ESC_Peaks_1449
chr2	163076146	163076498	ESC_Peaks_1450
chr2	163750165	163750576	ESC_Peaks_1451
chr2	164558735	164559177	ESC_Peaks_1452
chr2	164867519	164868006	ESC_Peaks_1453
chr2	164879776	164880224	ESC_Peaks_1454
chr2	164910758	164911251	ESC_Peaks_1455
chr2	165900365	165900579	ESC_Peaks_1456
chr2	165969333	165969751	ESC_Peaks_1457
chr2	166157074	166157736	ESC_Peaks_1458
chr2	166194399	166194899	ESC_Peaks_1459
chr2	166403149	166403790	ESC_Peaks_1460
chr2	166601359	166601944	ESC_Peaks_1461
chr2	167058838	167059246	ESC_Peaks_1462
chr2	167059582	167059942	ESC_Peaks_1463
chr2	167348293	167348526	ESC_Peaks_1464
chr2	167570348	167570650	ESC_Peaks_1465
chr2	167764983	167765524	ESC_Peaks_1466
chr2	167925174	167925554	ESC_Peaks_1467
chr2	168114953	168115444	ESC_Peaks_1468
chr2	168764595	168764888	ESC_Peaks_1469
chr2	168894702	168895004	ESC_Peaks_1470
chr2	169089128	169089461	ESC_Peaks_1471
chr2	170184454	170185009	ESC_Peaks_1472
chr2	170206375	170206709	ESC_Peaks_1473
chr2	170530331	170530643	ESC_Peaks_1474
chr2	172259139	172259450	ESC_Peaks_1475
chr2	172516453	172517168	ESC_Peaks_1476
chr2	172527249	172527578	ESC_Peaks_1477
chr2	172576898	172577795	ESC_Peaks_1478
chr2	172614932	172615226	ESC_Peaks_1479
chr2	173776219	173776481	ESC_Peaks_1480
chr2	174126560	174126920	ESC_Peaks_1481
chr2	178830395	178830642	ESC_Peaks_1482
chr2	179192770	179193172	ESC_Peaks_1483
chr2	180708926	180709619	ESC_Peaks_1484
chr2	180727840	180728104	ESC_Peaks_1485
chr2	181126004	181126429	ESC_Peaks_1486
chr3	7366538	7366949	ESC_Peaks_1487
chr3	8245709	8246126	ESC_Peaks_1488
chr3	8988617	8989287	ESC_Peaks_1489
chr3	9008651	9009079	ESC_Peaks_1490
chr3	9110842	9111226	ESC_Peaks_1491
chr3	9445783	9446233	ESC_Peaks_1492
chr3	10366688	10367098	ESC_Peaks_1493
chr3	14621302	14621637	ESC_Peaks_1494
chr3	14999793	15000288	ESC_Peaks_1495
chr3	16733806	16734343	ESC_Peaks_1496
chr3	17319283	17319654	ESC_Peaks_1497
chr3	18242756	18243078	ESC_Peaks_1498
chr3	18623856	18624413	ESC_Peaks_1499
chr3	25127644	25128009	ESC_Peaks_1500
chr3	27665295	27665765	ESC_Peaks_1501
chr3	28264470	28264839	ESC_Peaks_1502
chr3	28626793	28627224	ESC_Peaks_1503
chr3	30646768	30647184	ESC_Peaks_1504
chr3	30648430	30648755	ESC_Peaks_1505
chr3	31001301	31001652	ESC_Peaks_1506
chr3	31016568	31016903	ESC_Peaks_1507
chr3	32762877	32763437	ESC_Peaks_1508
chr3	34646214	34646602	ESC_Peaks_1509
chr3	34648821	34649337	ESC_Peaks_1510
chr3	34745103	34745501	ESC_Peaks_1511
chr3	34756515	34757085	ESC_Peaks_1512
chr3	34757770	34758195	ESC_Peaks_1513
chr3	34760237	34760682	ESC_Peaks_1514
chr3	34761078	34761698	ESC_Peaks_1515
chr3	36572303	36572722	ESC_Peaks_1516
chr3	37758085	37758529	ESC_Peaks_1517
chr3	45681429	45681749	ESC_Peaks_1518
chr3	49758859	49759185	ESC_Peaks_1519
chr3	51341322	51341600	ESC_Peaks_1520
chr3	52046044	52046428	ESC_Peaks_1521
chr3	53421771	53421982	ESC_Peaks_1522
chr3	53650174	53650751	ESC_Peaks_1523
chr3	54990053	54990543	ESC_Peaks_1524
chr3	58490556	58490819	ESC_Peaks_1525
chr3	59118248	59118627	ESC_Peaks_1526
chr3	59344195	59344609	ESC_Peaks_1527
chr3	62603887	62604153	ESC_Peaks_1528
chr3	63899325	63899625	ESC_Peaks_1529
chr3	65528039	65528503	ESC_Peaks_1530
chr3	67498949	67499102	ESC_Peaks_1531
chr3	68535246	68535532	ESC_Peaks_1532
chr3	69127299	69127654	ESC_Peaks_1533
chr3	69357948	69358200	ESC_Peaks_1534
chr3	73434412	73434774	ESC_Peaks_1535
chr3	79516072	79516495	ESC_Peaks_1536
chr3	79549015	79549379	ESC_Peaks_1537
chr3	81102125	81102462	ESC_Peaks_1538
chr3	83582960	83583573	ESC_Peaks_1539
chr3	83944258	83944634	ESC_Peaks_1540
chr3	83980421	83980868	ESC_Peaks_1541
chr3	84020815	84021177	ESC_Peaks_1542
chr3	84181687	84182219	ESC_Peaks_1543
chr3	84191360	84191742	ESC_Peaks_1544
chr3	86700336	86700557	ESC_Peaks_1545
chr3	86845097	86845471	ESC_Peaks_1546
chr3	87974733	87974985	ESC_Peaks_1547
chr3	88081799	88082407	ESC_Peaks_1548
chr3	88336617	88337024	ESC_Peaks_1549
chr3	88509695	88510542	ESC_Peaks_1550
chr3	88531191	88531597	ESC_Peaks_1551
chr3	88950919	88951326	ESC_Peaks_1552
chr3	89164558	89164907	ESC_Peaks_1553
chr3	89177183	89177542	ESC_Peaks_1554
chr3	89339322	89339747	ESC_Peaks_1555
chr3	89373579	89373885	ESC_Peaks_1556
chr3	89764299	89764789	ESC_Peaks_1557
chr3	93447264	93448008	ESC_Peaks_1558
chr3	95658502	95659026	ESC_Peaks_1559
chr3	95674054	95674638	ESC_Peaks_1560
chr3	95701947	95702492	ESC_Peaks_1561
chr3	96328397	96328809	ESC_Peaks_1562
chr3	96576749	96577255	ESC_Peaks_1563
chr3	96679425	96679849	ESC_Peaks_1564
chr3	101714926	101715407	ESC_Peaks_1565
chr3	102611768	102612039	ESC_Peaks_1566
chr3	103146313	103146711	ESC_Peaks_1567
chr3	103207904	103208282	ESC_Peaks_1568
chr3	103379353	103379783	ESC_Peaks_1569
chr3	105959114	105959557	ESC_Peaks_1570
chr3	108433495	108433945	ESC_Peaks_1571
chr3	116328348	116328639	ESC_Peaks_1572
chr3	116635872	116636130	ESC_Peaks_1573
chr3	116777589	116777925	ESC_Peaks_1574
chr3	119095200	119095592	ESC_Peaks_1575
chr3	121418994	121419460	ESC_Peaks_1576
chr3	121570028	121570265	ESC_Peaks_1577
chr3	121999993	122000296	ESC_Peaks_1578
chr3	122498577	122498959	ESC_Peaks_1579
chr3	131102187	131102669	ESC_Peaks_1580
chr3	133524528	133524953	ESC_Peaks_1581
chr3	133533369	133533663	ESC_Peaks_1582
chr3	135690632	135691003	ESC_Peaks_1583
chr3	136741544	136741910	ESC_Peaks_1584
chr3	137779949	137780525	ESC_Peaks_1585
chr3	137783183	137783519	ESC_Peaks_1586
chr3	137833019	137833502	ESC_Peaks_1587
chr3	137977117	137977737	ESC_Peaks_1588
chr3	142812859	142813091	ESC_Peaks_1589
chr3	145703352	145703664	ESC_Peaks_1590
chr3	146047660	146048028	ESC_Peaks_1591
chr3	149000870	149001201	ESC_Peaks_1592
chr3	149241030	149241497	ESC_Peaks_1593
chr3	149241780	149241954	ESC_Peaks_1594
chr3	149834150	149834406	ESC_Peaks_1595
chr3	153675902	153676353	ESC_Peaks_1596
chr3	155503839	155504048	ESC_Peaks_1597
chr4	5530464	5530796	ESC_Peaks_1598
chr4	5648395	5648672	ESC_Peaks_1599
chr4	5732468	5732873	ESC_Peaks_1600
chr4	10399674	10400017	ESC_Peaks_1601
chr4	10932200	10932723	ESC_Peaks_1602
chr4	16089215	16089585	ESC_Peaks_1603
chr4	16095221	16095603	ESC_Peaks_1604
chr4	19569919	19570263	ESC_Peaks_1605
chr4	22495031	22495287	ESC_Peaks_1606
chr4	23622354	23622566	ESC_Peaks_1607
chr4	24596131	24596328	ESC_Peaks_1608
chr4	25796232	25796572	ESC_Peaks_1609
chr4	28812751	28813052	ESC_Peaks_1610
chr4	32924112	32924444	ESC_Peaks_1611
chr4	33377686	33378148	ESC_Peaks_1612
chr4	34614751	34615153	ESC_Peaks_1613
chr4	34873235	34873461	ESC_Peaks_1614
chr4	34906228	34906533	ESC_Peaks_1615
chr4	40143100	40143645	ESC_Peaks_1616
chr4	43336422	43336856	ESC_Peaks_1617
chr4	44224226	44224553	ESC_Peaks_1618
chr4	44546434	44546801	ESC_Peaks_1619
chr4	45489739	45490274	ESC_Peaks_1620
chr4	45654514	45654959	ESC_Peaks_1621
chr4	45763348	45763667	ESC_Peaks_1622
chr4	45867337	45867671	ESC_Peaks_1623
chr4	46665453	46665729	ESC_Peaks_1624
chr4	46667208	46667599	ESC_Peaks_1625
chr4	53012155	53012400	ESC_Peaks_1626
chr4	53338947	53339676	ESC_Peaks_1627
chr4	53339709	53340158	ESC_Peaks_1628
chr4	53789454	53789745	ESC_Peaks_1629
chr4	53952603	53952853	ESC_Peaks_1630
chr4	54999622	54999982	ESC_Peaks_1631
chr4	55464000	55464564	ESC_Peaks_1632
chr4	55475249	55475814	ESC_Peaks_1633
chr4	55477211	55477942	ESC_Peaks_1634
chr4	57413116	57413306	ESC_Peaks_1635
chr4	57690709	57691287	ESC_Peaks_1636
chr4	57919929	57920481	ESC_Peaks_1637
chr4	57920543	57920966	ESC_Peaks_1638
chr4	62316389	62316802	ESC_Peaks_1639
chr4	69852752	69853075	ESC_Peaks_1640
chr4	70332581	70332893	ESC_Peaks_1641
chr4	83302872	83303160	ESC_Peaks_1642
chr4	83342050	83342466	ESC_Peaks_1643
chr4	84224306	84225032	ESC_Peaks_1644
chr4	86045856	86046418	ESC_Peaks_1645
chr4	86183681	86184165	ESC_Peaks_1646
chr4	86242192	86242447	ESC_Peaks_1647
chr4	86909647	86909814	ESC_Peaks_1648
chr4	87707372	87707705	ESC_Peaks_1649
chr4	88736450	88736799	ESC_Peaks_1650
chr4	91374850	91375186	ESC_Peaks_1651
chr4	93083589	93083881	ESC_Peaks_1652
chr4	98841074	98841559	ESC_Peaks_1653
chr4	99725991	99726208	ESC_Peaks_1654
chr4	101549929	101550409	ESC_Peaks_1655
chr4	102760118	102760472	ESC_Peaks_1656
chr4	105224025	105224443	ESC_Peaks_1657
chr4	105423692	105424098	ESC_Peaks_1658
chr4	105692507	105693109	ESC_Peaks_1659
chr4	106713510	106713956	ESC_Peaks_1660
chr4	106749620	106750037	ESC_Peaks_1661
chr4	106847554	106848473	ESC_Peaks_1662
chr4	106859481	106859941	ESC_Peaks_1663
chr4	108118280	108118756	ESC_Peaks_1664
chr4	109279993	109280357	ESC_Peaks_1665
chr4	109665063	109665363	ESC_Peaks_1666
chr4	110020234	110020666	ESC_Peaks_1667
chr4	110312054	110312505	ESC_Peaks_1668
chr4	115812320	115812634	ESC_Peaks_1669
chr4	115959874	115960146	ESC_Peaks_1670
chr4	116685604	116686104	ESC_Peaks_1671
chr4	116782150	116782619	ESC_Peaks_1672
chr4	117056624	117056920	ESC_Peaks_1673
chr4	117202460	117202876	ESC_Peaks_1674
chr4	118273761	118273926	ESC_Peaks_1675
chr4	118276491	118276796	ESC_Peaks_1676
chr4	118543785	118544129	ESC_Peaks_1677
chr4	118589802	118590089	ESC_Peaks_1678
chr4	118612600	118613041	ESC_Peaks_1679
chr4	119010988	119011495	ESC_Peaks_1680
chr4	119071679	119072745	ESC_Peaks_1681
chr4	119073598	119073966	ESC_Peaks_1682
chr4	119105650	119106099	ESC_Peaks_1683
chr4	119539398	119539568	ESC_Peaks_1684
chr4	123624486	123624876	ESC_Peaks_1685
chr4	123669708	123670019	ESC_Peaks_1686
chr4	123690234	123690629	ESC_Peaks_1687
chr4	124485866	124486501	ESC_Peaks_1688
chr4	125300562	125300888	ESC_Peaks_1689
chr4	125419861	125420317	ESC_Peaks_1690
chr4	125488825	125489207	ESC_Peaks_1691
chr4	125535943	125536315	ESC_Peaks_1692
chr4	125565492	125565928	ESC_Peaks_1693
chr4	125729192	125729661	ESC_Peaks_1694
chr4	126201931	126202432	ESC_Peaks_1695
chr4	126254834	126255169	ESC_Peaks_1696
chr4	126677467	126677908	ESC_Peaks_1697
chr4	127198731	127199079	ESC_Peaks_1698
chr4	127344901	127345444	ESC_Peaks_1699
chr4	128737213	128737612	ESC_Peaks_1700
chr4	129231544	129231926	ESC_Peaks_1701
chr4	129375011	129375449	ESC_Peaks_1702
chr4	129381961	129382373	ESC_Peaks_1703
chr4	129502925	129503458	ESC_Peaks_1704
chr4	129556448	129556808	ESC_Peaks_1705
chr4	129810800	129811413	ESC_Peaks_1706
chr4	130307695	130308069	ESC_Peaks_1707
chr4	130519783	130520818	ESC_Peaks_1708
chr4	130639928	130640556	ESC_Peaks_1709
chr4	132422224	132422625	ESC_Peaks_1710
chr4	132956570	132956930	ESC_Peaks_1711
chr4	132974862	132975221	ESC_Peaks_1712
chr4	133055542	133055889	ESC_Peaks_1713
chr4	133122109	133122630	ESC_Peaks_1714
chr4	133491917	133492099	ESC_Peaks_1715
chr4	133729667	133730170	ESC_Peaks_1716
chr4	133813862	133814445	ESC_Peaks_1717
chr4	134018777	134019331	ESC_Peaks_1718
chr4	134060019	134060388	ESC_Peaks_1719
chr4	134116945	134117304	ESC_Peaks_1720
chr4	134326978	134327344	ESC_Peaks_1721
chr4	135548636	135549069	ESC_Peaks_1722
chr4	136239598	136239886	ESC_Peaks_1723
chr4	136310727	136311121	ESC_Peaks_1724
chr4	137598694	137598984	ESC_Peaks_1725
chr4	138449224	138449587	ESC_Peaks_1726
chr4	138973380	138973818	ESC_Peaks_1727
chr4	139197902	139198353	ESC_Peaks_1728
chr4	139599033	139599689	ESC_Peaks_1729
chr4	140406018	140406264	ESC_Peaks_1730
chr4	140406320	140406665	ESC_Peaks_1731
chr4	140640064	140640617	ESC_Peaks_1732
chr4	140640725	140641064	ESC_Peaks_1733
chr4	140642491	140642763	ESC_Peaks_1734
chr4	140823471	140824043	ESC_Peaks_1735
chr4	140959850	140960322	ESC_Peaks_1736
chr4	141078180	141078559	ESC_Peaks_1737
chr4	141425970	141426285	ESC_Peaks_1738
chr4	141565390	141565765	ESC_Peaks_1739
chr4	141598231	141598901	ESC_Peaks_1740
chr4	141679054	141679395	ESC_Peaks_1741
chr4	142070796	142071303	ESC_Peaks_1742
chr4	142138219	142138738	ESC_Peaks_1743
chr4	142166179	142166734	ESC_Peaks_1744
chr4	144404497	144404888	ESC_Peaks_1745
chr4	145432296	145432751	ESC_Peaks_1746
chr4	146066954	146067275	ESC_Peaks_1747
chr4	148084004	148084674	ESC_Peaks_1748
chr4	148149630	148149922	ESC_Peaks_1749
chr4	148192518	148193058	ESC_Peaks_1750
chr4	148738211	148738775	ESC_Peaks_1751
chr4	148739074	148739486	ESC_Peaks_1752
chr4	149744851	149745112	ESC_Peaks_1753
chr4	149800073	149800491	ESC_Peaks_1754
chr4	149954913	149955480	ESC_Peaks_1755
chr4	150008296	150008653	ESC_Peaks_1756
chr4	150176607	150176940	ESC_Peaks_1757
chr4	151862057	151862780	ESC_Peaks_1758
chr4	152325398	152326050	ESC_Peaks_1759
chr4	152503148	152503333	ESC_Peaks_1760
chr4	153497020	153497395	ESC_Peaks_1761
chr4	154958165	154958558	ESC_Peaks_1762
chr4	154972540	154973052	ESC_Peaks_1763
chr4	155189689	155190130	ESC_Peaks_1764
chr4	155735548	155735869	ESC_Peaks_1765
chr4	155775507	155775743	ESC_Peaks_1766
chr4	155943436	155943897	ESC_Peaks_1767
chr4	156031686	156032359	ESC_Peaks_1768
chr4	156196123	156196586	ESC_Peaks_1769
chr5	4303512	4303960	ESC_Peaks_1770
chr5	7960122	7960578	ESC_Peaks_1771
chr5	8997089	8997569	ESC_Peaks_1772
chr5	21372469	21372843	ESC_Peaks_1773
chr5	21673262	21673678	ESC_Peaks_1774
chr5	22574005	22574562	ESC_Peaks_1775
chr5	23404713	23404988	ESC_Peaks_1776
chr5	24169973	24170340	ESC_Peaks_1777
chr5	24445051	24445497	ESC_Peaks_1778
chr5	24599046	24599530	ESC_Peaks_1779
chr5	26070332	26071109	ESC_Peaks_1780
chr5	28211589	28212031	ESC_Peaks_1781
chr5	28398886	28399199	ESC_Peaks_1782
chr5	30198203	30198673	ESC_Peaks_1783
chr5	31596784	31597130	ESC_Peaks_1784
chr5	32616576	32616887	ESC_Peaks_1785
chr5	33535307	33535804	ESC_Peaks_1786
chr5	34513781	34514091	ESC_Peaks_1787
chr5	35739929	35740262	ESC_Peaks_1788
chr5	35785778	35786254	ESC_Peaks_1789
chr5	37829300	37829587	ESC_Peaks_1790
chr5	38656191	38656523	ESC_Peaks_1791
chr5	43868990	43869715	ESC_Peaks_1792
chr5	45495448	45495786	ESC_Peaks_1793
chr5	52516129	52516478	ESC_Peaks_1794
chr5	53266977	53267299	ESC_Peaks_1795
chr5	53555422	53555856	ESC_Peaks_1796
chr5	53671524	53671869	ESC_Peaks_1797
chr5	63874845	63875251	ESC_Peaks_1798
chr5	64391325	64391796	ESC_Peaks_1799
chr5	64739506	64739809	ESC_Peaks_1800
chr5	64864674	64865268	ESC_Peaks_1801
chr5	65724782	65725110	ESC_Peaks_1802
chr5	66620331	66620775	ESC_Peaks_1803
chr5	66720760	66721252	ESC_Peaks_1804
chr5	67463596	67464047	ESC_Peaks_1805
chr5	72559581	72559938	ESC_Peaks_1806
chr5	73219669	73220133	ESC_Peaks_1807
chr5	73691927	73692345	ESC_Peaks_1808
chr5	76288330	76288763	ESC_Peaks_1809
chr5	76365404	76365676	ESC_Peaks_1810
chr5	76951553	76951975	ESC_Peaks_1811
chr5	77262123	77262530	ESC_Peaks_1812
chr5	92112520	92113118	ESC_Peaks_1813
chr5	96972809	96973194	ESC_Peaks_1814
chr5	97111563	97111813	ESC_Peaks_1815
chr5	97203595	97204106	ESC_Peaks_1816
chr5	101713336	101713853	ESC_Peaks_1817
chr5	103132802	103133138	ESC_Peaks_1818
chr5	103310213	103310486	ESC_Peaks_1819
chr5	103655460	103655807	ESC_Peaks_1820
chr5	103693211	103693587	ESC_Peaks_1821
chr5	103709109	103709470	ESC_Peaks_1822
chr5	103724180	103725036	ESC_Peaks_1823
chr5	104021942	104022363	ESC_Peaks_1824
chr5	104061939	104062376	ESC_Peaks_1825
chr5	105181420	105181787	ESC_Peaks_1826
chr5	110082879	110083364	ESC_Peaks_1827
chr5	110107474	110107930	ESC_Peaks_1828
chr5	110176301	110176629	ESC_Peaks_1829
chr5	110469263	110470028	ESC_Peaks_1830
chr5	110569277	110569822	ESC_Peaks_1831
chr5	110653121	110653593	ESC_Peaks_1832
chr5	110806525	110807109	ESC_Peaks_1833
chr5	110808379	110809210	ESC_Peaks_1834
chr5	113324352	113324807	ESC_Peaks_1835
chr5	113467779	113468245	ESC_Peaks_1836
chr5	113550630	113551077	ESC_Peaks_1837
chr5	113596934	113597202	ESC_Peaks_1838
chr5	114462566	114463108	ESC_Peaks_1839
chr5	114548891	114549259	ESC_Peaks_1840
chr5	114803273	114803673	ESC_Peaks_1841
chr5	115071908	115072175	ESC_Peaks_1842
chr5	115140765	115141018	ESC_Peaks_1843
chr5	115358862	115359364	ESC_Peaks_1844
chr5	115404193	115404744	ESC_Peaks_1845
chr5	115945220	115945457	ESC_Peaks_1846
chr5	116387605	116387964	ESC_Peaks_1847
chr5	116396094	116396545	ESC_Peaks_1848
chr5	116407825	116408474	ESC_Peaks_1849
chr5	116453300	116453593	ESC_Peaks_1850
chr5	116829677	116830219	ESC_Peaks_1851
chr5	117356461	117357041	ESC_Peaks_1852
chr5	117396590	117397059	ESC_Peaks_1853
chr5	117403664	117404077	ESC_Peaks_1854
chr5	117897849	117898317	ESC_Peaks_1855
chr5	118015052	118015476	ESC_Peaks_1856
chr5	118155219	118155618	ESC_Peaks_1857
chr5	118436496	118436919	ESC_Peaks_1858
chr5	118437013	118437414	ESC_Peaks_1859
chr5	118444969	118445666	ESC_Peaks_1860
chr5	118481337	118481592	ESC_Peaks_1861
chr5	119310145	119310574	ESC_Peaks_1862
chr5	119584958	119585533	ESC_Peaks_1863
chr5	119586403	119586754	ESC_Peaks_1864
chr5	119720479	119721092	ESC_Peaks_1865
chr5	122146590	122147042	ESC_Peaks_1866
chr5	122157895	122158427	ESC_Peaks_1867
chr5	122191580	122191975	ESC_Peaks_1868
chr5	122421919	122422286	ESC_Peaks_1869
chr5	123014534	123015067	ESC_Peaks_1870
chr5	123157977	123158486	ESC_Peaks_1871
chr5	124112122	124112537	ESC_Peaks_1872
chr5	124425783	124426219	ESC_Peaks_1873
chr5	124578838	124579201	ESC_Peaks_1874
chr5	125184952	125185217	ESC_Peaks_1875
chr5	125393001	125393551	ESC_Peaks_1876
chr5	125588181	125588605	ESC_Peaks_1877
chr5	125588986	125589753	ESC_Peaks_1878
chr5	128600452	128600668	ESC_Peaks_1879
chr5	129155231	129155700	ESC_Peaks_1880
chr5	129155707	129156109	ESC_Peaks_1881
chr5	129169296	129169826	ESC_Peaks_1882
chr5	130187368	130187715	ESC_Peaks_1883
chr5	131177240	131177632	ESC_Peaks_1884
chr5	131490854	131491265	ESC_Peaks_1885
chr5	134970530	134970971	ESC_Peaks_1886
chr5	135493154	135493416	ESC_Peaks_1887
chr5	135888694	135889317	ESC_Peaks_1888
chr5	135950973	135951419	ESC_Peaks_1889
chr5	136061611	136061883	ESC_Peaks_1890
chr5	136073009	136073549	ESC_Peaks_1891
chr5	137072381	137072676	ESC_Peaks_1892
chr5	137076157	137076596	ESC_Peaks_1893
chr5	137349581	137350061	ESC_Peaks_1894
chr5	137375620	137376062	ESC_Peaks_1895
chr5	137377671	137377901	ESC_Peaks_1896
chr5	137610446	137611012	ESC_Peaks_1897
chr5	137764601	137764943	ESC_Peaks_1898
chr5	139300280	139300833	ESC_Peaks_1899
chr5	139907371	139907768	ESC_Peaks_1900
chr5	140218046	140218488	ESC_Peaks_1901
chr5	142367051	142367593	ESC_Peaks_1902
chr5	142668141	142668484	ESC_Peaks_1903
chr5	142668595	142669176	ESC_Peaks_1904
chr5	142782515	142782867	ESC_Peaks_1905
chr5	142799206	142799531	ESC_Peaks_1906
chr5	142905867	142906185	ESC_Peaks_1907
chr5	142954889	142955302	ESC_Peaks_1908
chr5	146892841	146893317	ESC_Peaks_1909
chr5	147906245	147906688	ESC_Peaks_1910
chr5	149217830	149218165	ESC_Peaks_1911
chr5	149228958	149229551	ESC_Peaks_1912
chr5	149259068	149259349	ESC_Peaks_1913
chr5	150195771	150196096	ESC_Peaks_1914
chr5	150522397	150522735	ESC_Peaks_1915
chr5	150819457	150819933	ESC_Peaks_1916
chr5	151025526	151025830	ESC_Peaks_1917
chr6	3656952	3657128	ESC_Peaks_1918
chr6	3792341	3792513	ESC_Peaks_1919
chr6	5019214	5019809	ESC_Peaks_1920
chr6	5019842	5020340	ESC_Peaks_1921
chr6	5119146	5119963	ESC_Peaks_1922
chr6	5496421	5496831	ESC_Peaks_1923
chr6	8938771	8939047	ESC_Peaks_1924
chr6	30179019	30179370	ESC_Peaks_1925
chr6	30205948	30206365	ESC_Peaks_1926
chr6	30272211	30272610	ESC_Peaks_1927
chr6	30509598	30509910	ESC_Peaks_1928
chr6	31896926	31897380	ESC_Peaks_1929
chr6	31898613	31899019	ESC_Peaks_1930
chr6	31901829	31902315	ESC_Peaks_1931
chr6	31947940	31948699	ESC_Peaks_1932
chr6	35027340	35027552	ESC_Peaks_1933
chr6	35252463	35252877	ESC_Peaks_1934
chr6	37337001	37337303	ESC_Peaks_1935
chr6	37742442	37742752	ESC_Peaks_1936
chr6	37872968	37873289	ESC_Peaks_1937
chr6	38683955	38684257	ESC_Peaks_1938
chr6	39446163	39446546	ESC_Peaks_1939
chr6	39543131	39543393	ESC_Peaks_1940
chr6	39780945	39781220	ESC_Peaks_1941
chr6	47044501	47044723	ESC_Peaks_1942
chr6	47595188	47595618	ESC_Peaks_1943
chr6	49098950	49099427	ESC_Peaks_1944
chr6	49173587	49174041	ESC_Peaks_1945
chr6	50596951	50597188	ESC_Peaks_1946
chr6	51468803	51469271	ESC_Peaks_1947
chr6	52012133	52012902	ESC_Peaks_1948
chr6	52105202	52105599	ESC_Peaks_1949
chr6	52790754	52791172	ESC_Peaks_1950
chr6	52802174	52802548	ESC_Peaks_1951
chr6	54096839	54097266	ESC_Peaks_1952
chr6	54699067	54699540	ESC_Peaks_1953
chr6	54968127	54968464	ESC_Peaks_1954
chr6	55789181	55789487	ESC_Peaks_1955
chr6	55791757	55792421	ESC_Peaks_1956
chr6	61311814	61312156	ESC_Peaks_1957
chr6	61431142	61431514	ESC_Peaks_1958
chr6	65021757	65022303	ESC_Peaks_1959
chr6	65024525	65025187	ESC_Peaks_1960
chr6	67030453	67030660	ESC_Peaks_1961
chr6	70964095	70964454	ESC_Peaks_1962
chr6	71271311	71271670	ESC_Peaks_1963
chr6	71293666	71294044	ESC_Peaks_1964
chr6	82703821	82704227	ESC_Peaks_1965
chr6	82772875	82773552	ESC_Peaks_1966
chr6	83884097	83884417	ESC_Peaks_1967
chr6	85525488	85525753	ESC_Peaks_1968
chr6	86343695	86344153	ESC_Peaks_1969
chr6	86438393	86438911	ESC_Peaks_1970
chr6	86472447	86472859	ESC_Peaks_1971
chr6	87913475	87913846	ESC_Peaks_1972
chr6	88152153	88152471	ESC_Peaks_1973
chr6	88482958	88483369	ESC_Peaks_1974
chr6	88901956	88902179	ESC_Peaks_1975
chr6	89059246	89059857	ESC_Peaks_1976
chr6	89126009	89126328	ESC_Peaks_1977
chr6	89285075	89285636	ESC_Peaks_1978
chr6	91700845	91701329	ESC_Peaks_1979
chr6	92244625	92244958	ESC_Peaks_1980
chr6	92251884	92252334	ESC_Peaks_1981
chr6	92843525	92844062	ESC_Peaks_1982
chr6	94180528	94181186	ESC_Peaks_1983
chr6	94250188	94250648	ESC_Peaks_1984
chr6	97179007	97179307	ESC_Peaks_1985
chr6	97208386	97208816	ESC_Peaks_1986
chr6	97951676	97952080	ESC_Peaks_1987
chr6	97961736	97962304	ESC_Peaks_1988
chr6	98648018	98648269	ESC_Peaks_1989
chr6	100180841	100181191	ESC_Peaks_1990
chr6	100335420	100335887	ESC_Peaks_1991
chr6	100377869	100378257	ESC_Peaks_1992
chr6	101979181	101979624	ESC_Peaks_1993
chr6	105984075	105984293	ESC_Peaks_1994
chr6	108064954	108065366	ESC_Peaks_1995
chr6	108456659	108456959	ESC_Peaks_1996
chr6	108668388	108668775	ESC_Peaks_1997
chr6	108709541	108709868	ESC_Peaks_1998
chr6	113038576	113039029	ESC_Peaks_1999
[truncated: 546 more rows]
