# Supplementary material for: STAT3 is required for proliferation and exhibits a cell type-specific binding preference in mouse female germline stem cells
Source: Royal Society of Chemistry journal article supplement (doi:10.1039/c7mo00084g), 2018-02-12
Supplement: c7mo00084g2.xlsx [file c7mo00084g2.xlsx]

## Sheet: Sheet1
gene	locus	KO_value	WT_value	log2(fold_change)	p_value	q_value	significant
Loxl2	chr14:69609475-69695834	0.0466325	12.462	8.06199	0.0085	0.0478206	yes
Pbld1	chr10:63061616-63077536	0.468517	60.7995	7.01982	5e-05	0.00109173	yes
Bgn	chrX:73483634-73495936	0.170559	21.1532	6.95446	0.00105	0.0112642	yes
Cxcl12	chr6:117168534-117181368	1.06913	77.666	6.18277	5e-05	0.00109173	yes
Gm16702	chr17:8372395-8422726	0.932751	34.9856	5.22912	5e-05	0.00109173	yes
Rem1	chr2:152627007-152635191	0.158022	5.92084	5.2276	0.00515	0.0341405	yes
Fam189b	chr3:89183224-89189289	0.144846	4.4553	4.94293	0.00035	0.00500786	yes
Rbpms	chr8:33782643-33929863	0.0969586	2.90326	4.90416	0.0048	0.0327252	yes
Lars2	chr9:123366939-123462664	29.7476	713.431	4.58393	5e-05	0.00109173	yes
Fam19a5	chr15:87544298-87759364	0.135219	3.17935	4.55536	0.0035	0.0261376	yes
Slc7a14	chr3:31202855-31310319	0.0433294	1.01597	4.55136	0.00255	0.0209621	yes
Arl6ip1	chr7:118118889-118129625	1.3852	25.7193	4.21468	5e-05	0.00109173	yes
Pla2g7	chr17:43568450-43612201	0.15982	2.9471	4.20477	0.0084	0.0474855	yes
Pcdh9	chr14:93013699-93890669	0.118144	1.69519	3.84283	0.0007	0.0084424	yes
Rps15a-ps4	chr4:132219892-132220589	2.13458	29.2371	3.77578	0.0003	0.00450652	yes
Rnf165	chr18:77456109-77565136	0.0861909	1.05763	3.61715	0.0003	0.00450652	yes
Gm1673	chr5:33983473-33985006	6.24998	72.566	3.53737	5e-05	0.00109173	yes
Adam23	chr1:63445903-63596515	0.580523	6.71997	3.53303	0.0001	0.00193845	yes
Fzd8	chr18:9212855-9216201	0.249751	2.88703	3.53103	0.001	0.0108869	yes
Aig1	chr10:13652708-13868830	0.697812	7.97737	3.515	0.00065	0.00799534	yes
H1fx	chr6:87980420-87981482	1.62735	17.6471	3.43883	5e-05	0.00109173	yes
Stc1	chr14:69029288-69041401	0.363759	3.65644	3.32938	0.00035	0.00500786	yes
Tll1	chr8:64014769-64205993	0.0920468	0.91738	3.31708	0.0054	0.0353392	yes
Slfn5	chr11:82911252-82964850	0.354691	3.35909	3.24344	5e-05	0.00109173	yes
Plscr2	chr9:92275601-92297752	2.40957	22.1216	3.19861	5e-05	0.00109173	yes
Eda2r	chrX:97333840-97377209	0.216951	1.99091	3.19798	0.00305	0.0237589	yes
Pcdh1	chr18:38196693-38209762	0.188307	1.55895	3.04942	0.0013	0.0128761	yes
Tmem181b-ps	chr17:6439001-6450994	0.224273	1.83531	3.0327	0.0015	0.0142676	yes
Mustn1	chr14:30879256-30881610	0.561411	4.55194	3.01935	0.00225	0.0191805	yes
Pkdcc	chr17:83215282-83225069	0.961277	7.69646	3.00117	5e-05	0.00109173	yes
Smad7	chr18:75367364-75395934	2.84915	22.7391	2.99657	5e-05	0.00109173	yes
Gmeb1	chr4:132221024-132261549	4.59183	35.3619	2.94505	5e-05	0.00109173	yes
Hspb7	chr4:141420778-141425310	0.198085	1.45369	2.87553	0.0023	0.0195217	yes
Marcks	chr10:37133242-37138926	3.55147	25.4952	2.84374	5e-05	0.00109173	yes
Tubb2b	chr13:34127007-34130354	1.13454	8.09091	2.83419	5e-05	0.00109173	yes
5730559C18Rik	chr1:136213521-136234280	0.133875	0.886902	2.72789	0.0061	0.0383807	yes
Csf3	chr11:98701312-98703629	0.963868	6.30631	2.70989	0.0002	0.00333722	yes
Cdc42ep5	chr7:4151259-4164699	4.31562	28.079	2.70185	5e-05	0.00109173	yes
Cd209c	chr8:3940221-3946863	2.05904	13.3331	2.69496	5e-05	0.00109173	yes
Nrcam	chr12:44328884-44601846	1.32483	8.39689	2.66404	5e-05	0.00109173	yes
Egr2	chr10:67537868-67542188	0.21365	1.34126	2.65027	0.00135	0.0132044	yes
Nedd9	chr13:41309915-41487360	0.230547	1.42063	2.6234	0.0011	0.0116727	yes
Rab33b	chr3:51483965-51496212	12.0162	72.5515	2.59402	5e-05	0.00109173	yes
Serpinb8	chr1:107590005-107608978	0.373209	2.24709	2.59	0.00455	0.0313851	yes
Pde4b	chr4:102254741-102607262	0.537972	3.18326	2.5649	0.00025	0.00395256	yes
Sema7a	chr9:57940134-57962865	1.58317	9.3573	2.56328	5e-05	0.00109173	yes
Smad9	chr3:54755581-54801269	0.0949344	0.559044	2.55796	0.00795	0.0456892	yes
Dmpk	chr7:19083848-19093820	1.40879	8.26637	2.5528	5e-05	0.00109173	yes
Sirt1	chr10:63319004-63339035	0.197212	1.15358	2.5483	0.0066	0.0403803	yes
Spry4	chr18:38586264-38601268	1.17	6.75428	2.5293	5e-05	0.00109173	yes
1190002F15Rik	chr6:134929091-134951718	6.56369	37.5908	2.5178	5e-05	0.00109173	yes
Gata2	chr6:88198663-88207032	2.91248	16.5474	2.50628	5e-05	0.00109173	yes
Egr3	chr14:70077444-70082613	0.33066	1.85523	2.48818	0.00095	0.0105379	yes
Rbm47	chr5:66016548-66151954	0.122037	0.681879	2.4822	0.0049	0.0331378	yes
Pvrl1	chr9:43744575-43807461	2.65038	14.7005	2.4716	5e-05	0.00109173	yes
Hist2h2bb	chr3:96269699-96270192	2.09054	11.5478	2.46567	0.0025	0.0206377	yes
Snhg10	chr12:105030616-105032279	2.80732	15.3377	2.44982	0.0047	0.0321929	yes
Plekho1	chr3:95988835-95995839	6.82621	36.2156	2.40746	5e-05	0.00109173	yes
Asphd2	chr5:112385444-112392213	1.89121	9.97539	2.39906	5e-05	0.00109173	yes
Rmi2	chr16:10835058-10843235	0.459576	2.41094	2.39122	0.00045	0.00613955	yes
Ada	chr2:163726570-163750239	1.62167	8.49318	2.38883	0.00025	0.00395256	yes
Smdt1	chr15:82346045-82349062	7.31475	38.2763	2.38757	5e-05	0.00109173	yes
Rgs20	chr1:4909575-5070285	0.322425	1.67843	2.38007	0.0069	0.0415876	yes
Spon2	chr5:33213517-33218238	0.368323	1.91528	2.37851	0.0051	0.0339048	yes
Ak1	chr2:32621757-32635058	8.06775	41.8058	2.37346	5e-05	0.00109173	yes
Anks6	chr4:47015688-47057306	0.329621	1.67242	2.34306	0.0005	0.00659944	yes
Egr1	chr18:34861206-34864956	18.2374	92.0499	2.33551	5e-05	0.00109173	yes
Dclre1c	chr2:3424130-3474986	6.44746	32.4646	2.33206	5e-05	0.00109173	yes
Atp5k	chr5:108433252-108434378	126.672	636.139	2.32824	5e-05	0.00109173	yes
Cdk2ap1	chr5:124345438-124354628	55.7853	279.615	2.32548	5e-05	0.00109173	yes
Tmem69	chr4:116551527-116555943	7.70022	38.5277	2.32293	5e-05	0.00109173	yes
Gas6	chr8:13465373-13494535	1.40411	6.91605	2.30029	5e-05	0.00109173	yes
Adamts5	chr16:85858156-85901125	0.571122	2.79888	2.29298	5e-05	0.00109173	yes
Tmem200b	chr4:131921770-131923140	1.44762	7.0732	2.28868	0.0002	0.00333722	yes
Pygo1	chr9:72925649-72946015	0.51061	2.47498	2.27713	0.00195	0.0173011	yes
Tfap4	chr16:4544660-4559720	3.40668	16.4151	2.26859	5e-05	0.00109173	yes
Plau	chr14:20836661-20843388	1.70453	8.13254	2.25433	5e-05	0.00109173	yes
Shroom3	chr5:92683434-92965759	0.115498	0.545888	2.24073	0.0028	0.0223752	yes
Slpi	chr2:164354069-164356507	23.3892	110.123	2.2352	5e-05	0.00109173	yes
Itgb7	chr15:102215994-102231935	17.8483	83.5335	2.22657	5e-05	0.00109173	yes
Msx1os	chr5:37820490-37824585	0.682548	3.19375	2.22625	0.0066	0.0403803	yes
Plxnd1	chr6:115954810-115995005	0.278638	1.29879	2.2207	0.00135	0.0132044	yes
Rabl2	chr15:89582526-89591923	0.347857	1.61936	2.21886	0.00625	0.0389903	yes
Snrpg	chr6:86371539-86378902	124.894	579.549	2.21423	5e-05	0.00109173	yes
Pdgfa	chr5:138976971-138994953	8.78656	40.7699	2.21413	5e-05	0.00109173	yes
Marcksl1	chr4:129513580-129515981	15.6514	72.5136	2.21196	5e-05	0.00109173	yes
Tfeb	chr17:47737036-47792416	1.25253	5.77526	2.20504	0.0001	0.00193845	yes
Snhg8	chr3:123507551-123508336	16.3081	75.1463	2.20411	5e-05	0.00109173	yes
Nov	chr15:54745927-54753761	1.29249	5.91429	2.19405	0.00035	0.00500786	yes
BC029214	chr2:25459487-25461094	1.61701	7.35493	2.18538	0.00095	0.0105379	yes
Dbhos	chr2:27144897-27162703	0.278696	1.24216	2.15609	0.00275	0.0221262	yes
Relt	chr7:100845847-100863413	0.953945	4.24413	2.15349	0.00035	0.00500786	yes
Limk1	chr5:134656038-134688590	12.3476	54.7861	2.14958	5e-05	0.00109173	yes
Cep170b	chr12:112722173-112746591	0.475651	2.09975	2.14224	5e-05	0.00109173	yes
2300009A05Rik	chr9:63394446-63399244	5.16514	22.6861	2.13493	0.0012	0.0122047	yes
Dusp5	chr19:53529317-53541322	9.17101	40.0105	2.12523	5e-05	0.00109173	yes
Cxcl10	chr5:92331840-92414627	1.96243	8.51534	2.11742	0.00235	0.0198458	yes
Gm17821	chr12:67656741-67669271	0.462721	1.99265	2.10648	5e-05	0.00109173	yes
Sepw1	chr7:15917207-15922371	142.352	606.959	2.09214	5e-05	0.00109173	yes
Tmsb10	chr6:72957346-72958748	73.8094	310.917	2.07465	5e-05	0.00109173	yes
Ptp4a3	chr15:73723144-73758766	0.554036	2.32171	2.06714	0.0004	0.0055673	yes
Msi1	chr5:115429684-115454202	2.51692	10.5306	2.06486	0.0001	0.00193845	yes
Ccne1	chr7:38097983-38107490	3.33923	13.8588	2.05322	0.0001	0.00193845	yes
Hmga1-rs1	chr17:27556573-27563672	210.354	867.638	2.04427	0.0013	0.0128761	yes
Pik3c2b	chr1:133046011-133108688	0.346895	1.42936	2.0428	0.00025	0.00395256	yes
Minos1	chr4:139101813-139131113	8.51179	34.9225	2.03662	5e-05	0.00109173	yes
Adgra3	chr8:27085840-27123436	9.88768	40.4517	2.0325	5e-05	0.00109173	yes
Neurl1b	chr17:26414964-26446342	1.5575	6.34036	2.02533	5e-05	0.00109173	yes
H1f0	chr15:79028211-79030500	76.3063	310.451	2.02449	5e-05	0.00109173	yes
Troap	chr15:99074972-99083409	4.36205	17.6018	2.01264	5e-05	0.00109173	yes
Pim1	chr17:29491044-29495459	5.05845	20.2995	2.00468	5e-05	0.00109173	yes
Spata24	chr18:35656688-35662186	1.70185	6.80422	1.99933	0.00835	0.0472255	yes
Iglon5	chr7:43472906-43490023	2.87898	11.4735	1.99467	5e-05	0.00109173	yes
Rassf4	chr6:116633007-116673836	0.188286	0.748975	1.99199	0.0055	0.0357942	yes
Rnaseh2c	chr19:5601872-5602959	24.1258	95.4872	1.98473	5e-05	0.00109173	yes
Tpst2	chr5:112276706-112315356	12.6442	49.682	1.97425	5e-05	0.00109173	yes
Polr2l	chr7:141471859-141475153	11.6733	45.6188	1.96641	5e-05	0.00109173	yes
Tmem189	chr2:167643224-167661544	12.668	49.4856	1.96583	5e-05	0.00109173	yes
Echdc2	chr4:108165436-108179308	1.79336	6.97801	1.96015	0.0008	0.00932302	yes
Gm684	chr9:51270257-51278554	0.837186	3.22144	1.94409	0.0056	0.0361844	yes
Stab1	chr14:31134852-31168641	0.144838	0.55517	1.93849	0.0047	0.0321929	yes
Krba1	chr6:48395585-48419855	0.29242	1.12063	1.9382	0.00105	0.0112642	yes
Chrd	chr16:20724453-20742384	0.524856	2.00593	1.93428	0.0031	0.0240526	yes
Irf2bp2	chr8:126588295-126593436	17.1943	65.6608	1.9331	5e-05	0.00109173	yes
Cox14	chr15:99725617-99728136	25.5493	97.48	1.93182	5e-05	0.00109173	yes
Cdkn1a	chr17:29090985-29100722	4.97369	18.9744	1.93167	5e-05	0.00109173	yes
Ufsp1	chr5:137294668-137295664	2.61268	9.95247	1.92952	0.001	0.0108869	yes
Rcan1	chr16:92391950-92466169	10.9479	41.6397	1.9273	5e-05	0.00109173	yes
Cox6a1	chr5:115345653-115348955	158.98	602.713	1.92263	5e-05	0.00109173	yes
E2f4	chr8:105297662-105305370	19.4247	73.4772	1.9194	5e-05	0.00109173	yes
Lsp1	chr7:142460811-142516009	0.389405	1.46859	1.91509	0.0077	0.0448225	yes
Tmem121	chr12:113185902-113189522	2.89087	10.8933	1.91386	0.00035	0.00500786	yes
Ptgis	chr2:167203195-167240537	1.96257	7.38173	1.91121	0.00025	0.00395256	yes
Gpr176	chr2:118277097-118373419	0.959127	3.59702	1.90701	0.0012	0.0122047	yes
Enkd1	chr8:105703651-105708168	7.43529	27.8466	1.90504	5e-05	0.00109173	yes
Atpif1	chr4:132530554-132535414	33.8577	126.46	1.90112	5e-05	0.00109173	yes
Tnc	chr4:63959784-64047015	5.89601	21.9935	1.89926	5e-05	0.00109173	yes
Cdc34	chr10:79682194-79688398	31.0125	115.42	1.89597	5e-05	0.00109173	yes
Pcbp4	chr9:106453837-106465940	37.0333	137.063	1.88794	5e-05	0.00109173	yes
Serpinf1	chr11:75410028-75422623	12.8696	47.6268	1.88781	5e-05	0.00109173	yes
Ier2	chr8:84661330-84662852	9.49776	35.0849	1.88519	5e-05	0.00109173	yes
Ppp1r14b	chr19:6975047-6977324	159.423	588.095	1.88319	5e-05	0.00109173	yes
Furin	chr7:80389193-80405436	7.07966	26.0307	1.87846	5e-05	0.00109173	yes
Ahcy	chr2:155059311-155074497	35.2139	129.4	1.87762	5e-05	0.00109173	yes
Edn1	chr13:42301269-42307989	0.540284	1.98145	1.87476	0.00525	0.0345694	yes
Mrpl33	chr5:31613950-31622644	85.7944	313.551	1.86975	5e-05	0.00109173	yes
Foxd2os	chr4:114909288-114921118	0.990201	3.61309	1.86744	0.001	0.0108869	yes
Crebbp	chr16:4084047-4213404	5.58474	20.3413	1.86485	5e-05	0.00109173	yes
Mfsd10	chr5:34633646-34637114	10.3672	37.7366	1.86394	5e-05	0.00109173	yes
Fosb	chr7:19302695-19310045	0.472921	1.72055	1.8632	0.00205	0.0179712	yes
Tead3	chr17:28331672-28350805	4.76279	17.2741	1.85873	0.0001	0.00193845	yes
Gins2	chr8:120488865-120589075	6.9398	25.1622	1.85829	0.00385	0.027969	yes
1700056E22Rik	chr1:184033031-184033998	1.13219	4.10434	1.85803	0.00845	0.0476077	yes
Btg2	chr1:134074864-134079155	0.566202	2.04682	1.854	0.0037	0.027233	yes
Nyap1	chr5:137730962-137739998	3.89644	14.0777	1.85319	5e-05	0.00109173	yes
Irx1	chr13:71958231-71963723	7.82166	28.1445	1.84731	5e-05	0.00109173	yes
Dusp7	chr9:106368631-106375723	13.4031	48.086	1.84305	5e-05	0.00109173	yes
Cd200	chr16:45382134-45409053	1.89699	6.78081	1.83775	0.0013	0.0128761	yes
Vps37b	chr5:124004640-124032260	26.5445	94.8366	1.83703	5e-05	0.00109173	yes
Ndufa13	chr8:69894181-69903518	27.806	99.2859	1.83619	5e-05	0.00109173	yes
Ndufb4	chr16:37647601-37654368	54.2812	193.582	1.83442	5e-05	0.00109173	yes
Lrr1	chr12:69168813-69179010	1.48631	5.28318	1.82967	0.0041	0.0291542	yes
Aes	chr10:81559443-81566371	86.8296	308.601	1.82948	5e-05	0.00109173	yes
Dlgap1	chr17:70424791-70821413	0.40529	1.43981	1.82885	0.0038	0.0277776	yes
A930005H10Rik	chr3:115881578-115888130	3.88482	13.7724	1.82586	0.00225	0.0191805	yes
Glrx5	chr12:105032688-105040910	47.7892	168.935	1.82171	5e-05	0.00109173	yes
Cfl1	chr19:5490454-5494031	428.754	1512.97	1.81916	0.0003	0.00450652	yes
Ppp1r11	chr17:36948354-36951792	20.1933	71.2524	1.81906	5e-05	0.00109173	yes
1110001J03Rik	chr6:38534860-38539449	17.2722	60.7858	1.81528	0.00115	0.012008	yes
Ung	chr5:114130434-114139321	3.35384	11.7813	1.81261	5e-05	0.00109173	yes
Polr2f	chr15:79141366-79151767	45.4246	159.448	1.81155	5e-05	0.00109173	yes
Gadd45g	chr13:51846674-51848474	17.3384	60.7816	1.80967	5e-05	0.00109173	yes
Cela1	chr15:100674421-100687920	4.43104	15.5135	1.8078	0.00075	0.0088813	yes
Car11	chr7:45699966-45704661	1.06213	3.69687	1.79935	0.005	0.0335054	yes
Srgap1	chr10:121780990-122047315	0.423505	1.47403	1.79932	0.00075	0.0088813	yes
Ccnd3	chr17:47505050-47611492	14.9032	51.3598	1.78501	0.00495	0.0333224	yes
Mamstr	chr7:45639976-45645768	1.44909	4.98983	1.78385	0.00115	0.012008	yes
Gpr137	chr19:6938069-6951905	3.87802	13.3194	1.78013	0.0076	0.0444386	yes
Plk3	chr4:117126812-117133952	14.5567	49.9058	1.77753	5e-05	0.00109173	yes
Tesk1	chr4:43442276-43454626	4.97622	17.0529	1.77689	5e-05	0.00109173	yes
Cdc42ep1	chr15:78842646-78855529	5.3995	18.439	1.77187	5e-05	0.00109173	yes
Ssc4d	chr5:135960222-135974476	0.676734	2.30767	1.76977	0.0041	0.0291542	yes
Ap1s1	chr5:137034993-137046060	82.6032	281.563	1.76919	5e-05	0.00109173	yes
Fam195a	chr17:25863697-25868738	11.5541	39.3415	1.76765	5e-05	0.00109173	yes
Fbln2	chr6:91212763-91272540	15.0135	50.9669	1.7633	5e-05	0.00109173	yes
B4galt5	chr2:167298444-167349178	22.2251	75.4374	1.76309	5e-05	0.00109173	yes
Psmd9	chr5:123228189-123250125	7.52652	25.5362	1.76249	5e-05	0.00109173	yes
Nsg1	chr5:38039229-38159467	11.5188	39.0018	1.75955	0.0056	0.0361844	yes
Rrm2	chr12:24708253-24714146	18.9631	64.1319	1.75785	5e-05	0.00109173	yes
Bach2	chr4:32417434-32586108	0.330075	1.1129	1.75346	0.00475	0.0324786	yes
Mpv17l	chr16:13903160-13949619	2.79277	9.38778	1.74909	5e-05	0.00109173	yes
Zbed3	chr13:95323604-95337842	6.25941	21.0342	1.74864	5e-05	0.00109173	yes
Nudt3	chr17:27579381-27623452	25.9107	86.8941	1.74571	0.0001	0.00193845	yes
Metrn	chr17:25794570-25797045	39.9272	133.78	1.74442	5e-05	0.00109173	yes
Orai1	chr5:123015073-123030452	4.11422	13.7521	1.74096	0.0003	0.00450652	yes
Hbegf	chr18:36504926-36515805	10.1577	33.8519	1.73666	5e-05	0.00109173	yes
Smco4	chr9:15505494-15545259	2.32595	7.74732	1.73588	0.00595	0.0376994	yes
Mybl2	chr2:163054634-163084687	9.20156	30.5834	1.7328	5e-05	0.00109173	yes
Scg5	chr2:113776312-113829091	3.53333	11.7365	1.7319	0.0012	0.0122047	yes
Pebp1	chr5:117282650-117287564	201.789	668.993	1.72914	5e-05	0.00109173	yes
Bard1	chr1:71027534-71102972	3.74415	12.4112	1.72893	5e-05	0.00109173	yes
Usp17la	chr7:104857015-104862667	1.81798	6.01969	1.72735	0.0013	0.0128761	yes
Map1lc3a	chr2:155276363-155278073	10.1337	33.4214	1.72161	5e-05	0.00109173	yes
Pet100	chr8:3621550-3625545	5.4491	17.9606	1.72074	0.0004	0.0055673	yes
Twist1	chr12:33957670-33959831	13.647	44.9812	1.72074	5e-05	0.00109173	yes
B630019K06Rik	chrX:8892352-8894964	2.94905	9.71164	1.71947	0.0007	0.0084424	yes
Tusc1	chr4:93334147-93335511	4.07427	13.4155	1.71929	0.00075	0.0088813	yes
Erf	chr7:25242559-25250758	8.0627	26.5147	1.71746	5e-05	0.00109173	yes
Eva1b	chr4:126148002-126149874	8.35299	27.3946	1.71353	5e-05	0.00109173	yes
Rest	chr5:77265493-77283697	8.31116	27.171	1.70895	5e-05	0.00109173	yes
Pam16	chr16:4616465-4624946	13.8028	45.0782	1.70747	0.00035	0.00500786	yes
Cdkn2d	chr9:21288463-21291209	4.032	13.1632	1.70694	0.00105	0.0112642	yes
Cenpa	chr5:30666885-30674837	31.9492	104.242	1.70609	5e-05	0.00109173	yes
Dpm3	chr3:89266460-89267079	28.0127	91.2457	1.70367	0.0002	0.00333722	yes
Pcyox1l	chr18:61696836-61707635	4.92716	16.0445	1.70325	0.0001	0.00193845	yes
Oaf	chr9:43221277-43239816	32.2026	104.308	1.69559	5e-05	0.00109173	yes
Mmp14	chr14:54431603-54441258	47.6053	154.098	1.69465	5e-05	0.00109173	yes
Tmem184a	chr5:139804951-139814283	6.78307	21.9439	1.69381	0.0001	0.00193845	yes
Gtpbp10	chr5:5537456-5559501	1.61256	5.21049	1.69206	0.00265	0.0214983	yes
Polr2j	chr5:136116690-136122947	56.5572	182.611	1.69099	5e-05	0.00109173	yes
Fscn1	chr5:142960354-142973189	89.885	289.901	1.68941	0.0001	0.00193845	yes
Uhrf1	chr17:56303336-56323486	28.9306	93.2499	1.6885	0.00015	0.00264572	yes
Mras	chr9:99385419-99436712	17.8513	57.5175	1.68797	5e-05	0.00109173	yes
Mn1	chr5:111418165-111457025	4.15946	13.3996	1.68772	5e-05	0.00109173	yes
Lsm5	chr6:56701062-56704699	27.5633	88.7492	1.68698	0.0012	0.0122047	yes
Smim3	chr18:60474190-60501983	9.63271	30.9113	1.68212	0.00025	0.00395256	yes
Adarb2	chr13:8202865-8768762	2.70127	8.65265	1.6795	0.0001	0.00193845	yes
Dtx2	chr5:135994799-136032881	6.56708	21.0134	1.67798	0.0002	0.00333722	yes
Dpysl2	chr14:66802863-66868600	8.85117	28.309	1.67732	5e-05	0.00109173	yes
Tmem134	chr19:4125959-4132307	15.3159	48.8909	1.67454	5e-05	0.00109173	yes
Ndufa4	chr6:11900372-11907446	92.3652	294.667	1.67366	5e-05	0.00109173	yes
Gpx1	chr9:108339079-108340344	177.54	566.318	1.67347	5e-05	0.00109173	yes
Asf1b	chr8:83955693-83970195	22.4274	71.2822	1.66828	5e-05	0.00109173	yes
Mrpl51	chr6:125192199-125194392	18.8401	59.8488	1.66752	5e-05	0.00109173	yes
Higd1a	chr9:121848559-121858000	11.3454	35.93	1.66307	5e-05	0.00109173	yes
Mvk	chr5:114444268-114460590	10.9683	34.6557	1.65975	5e-05	0.00109173	yes
Sh3bp1	chr15:78899785-78912052	6.44599	20.3624	1.65943	0.0001	0.00193845	yes
Fndc4	chr5:31292245-31295877	4.64454	14.6599	1.65827	5e-05	0.00109173	yes
5430416N02Rik	chr5:100420841-100429535	14.4571	45.5577	1.65591	0.00185	0.0165893	yes
Ndufa1	chrX:37187588-37191238	87.3628	275.05	1.6546	5e-05	0.00109173	yes
Ndufa11	chr17:56717761-56724248	6.97881	21.9089	1.65047	5e-05	0.00109173	yes
Uqcr10	chr11:4701967-4704344	145.149	455.655	1.6504	5e-05	0.00109173	yes
Tomm6	chr17:47686644-47694736	42.1573	132.252	1.64943	5e-05	0.00109173	yes
Snrpc	chr17:27840086-27851967	34.2219	107.345	1.64926	0.0001	0.00193845	yes
Cpsf4	chr5:145167212-145182041	16.6102	52.0793	1.64864	0.0001	0.00193845	yes
Ecscr	chr18:35713088-35721491	5.67983	17.7971	1.64772	0.00065	0.00799534	yes
2310039H08Rik	chr17:46772634-46773407	13.1836	41.2658	1.6462	0.00025	0.00395256	yes
Ndufs5	chr4:123712709-123718186	29.6197	92.1953	1.63814	0.00345	0.0258135	yes
4930447F24Rik	chr9:108096021-108190383	6.72223	20.9172	1.63768	0.0017	0.015675	yes
Sh3bgrl3	chr4:134127405-134128753	73.0132	227.077	1.63695	5e-05	0.00109173	yes
Npm3	chr19:45747733-45749563	57.3095	178.035	1.63532	5e-05	0.00109173	yes
Vps37d	chr5:135072899-135078266	2.54474	7.89131	1.63275	0.00275	0.0221262	yes
Cotl1	chr8:119809213-119840579	5.56328	17.2369	1.63149	5e-05	0.00109173	yes
Med29	chr7:28385246-28392690	4.99848	15.4717	1.63008	0.0001	0.00193845	yes
Rassf3	chr10:121410350-121476250	0.733002	2.26819	1.62965	0.00475	0.0324786	yes
Speg	chr1:75375296-75432306	6.0156	18.5338	1.62338	0.0016	0.0149405	yes
Rab1b	chr19:5099206-5106996	35.4511	109.218	1.62331	5e-05	0.00109173	yes
Ralgds	chr2:28513166-28553082	3.51598	10.8139	1.62089	0.0003	0.00450652	yes
Rpl34,Rpl34-ps1	chr3:130726826-130730398	731.5	2249.03	1.62037	0.00415	0.0294207	yes
Chac1	chr2:119351241-119354327	51.5491	158.384	1.61941	0.00015	0.00264572	yes
Cenpm	chr15:82233775-82244747	5.69556	17.4879	1.61844	0.00125	0.0125502	yes
Khsrp	chr17:57021048-57031507	35.8437	109.859	1.61587	5e-05	0.00109173	yes
Ndufa2	chr18:36735069-36744587	78.0318	238.946	1.61455	5e-05	0.00109173	yes
Sec61b	chr4:47474660-47483233	85.2458	260.696	1.61267	5e-05	0.00109173	yes
Eif1b	chr9:120492605-120495327	7.06079	21.582	1.61193	0.00135	0.0132044	yes
Cd82	chr2:93419101-93469874	7.08574	21.6017	1.60815	0.0001	0.00193845	yes
Snai1	chr2:167538226-167542811	3.92254	11.9412	1.60608	0.00065	0.00799534	yes
Rpl12	chr2:32961711-32964045	685.192	2082.65	1.60384	0.0002	0.00333722	yes
Shfm1	chr6:6558274-6578658	120.261	365.518	1.60378	5e-05	0.00109173	yes
Bcl7c	chr7:127704977-127708766	11.5728	35.1613	1.60324	0.00015	0.00264572	yes
Atp5j	chr16:84827870-84863778	103.152	313.352	1.60302	0.00455	0.0313851	yes
Afap1	chr5:35893318-36003922	6.78966	20.6096	1.6019	5e-05	0.00109173	yes
2310009B15Rik	chr1:138851978-138856854	11.8289	35.8737	1.60061	0.0016	0.0149405	yes
Txnip	chr3:96555767-96566801	1.29429	3.92441	1.60032	0.00315	0.0242643	yes
Med18	chr4:132458728-132463921	2.86666	8.68664	1.59943	0.0021	0.0182731	yes
Shf	chr2:122348891-122368918	1.94663	5.89603	1.59877	0.0025	0.0206377	yes
Gm12603	chr4:89050306-89084610	13.3788	40.4838	1.59739	0.0016	0.0149405	yes
Dram1	chr10:88322803-88357075	1.46141	4.41795	1.59602	0.00355	0.0263769	yes
Fxyd5	chr7:31032722-31042331	46.3333	139.902	1.59429	5e-05	0.00109173	yes
Crlf2	chr5:109554708-109558993	5.01543	15.1365	1.59359	0.0009	0.0101364	yes
Rps21	chr2:180257378-180258444	1020.59	3075.58	1.59145	0.0001	0.00193845	yes
Pfdn1	chr18:36403678-36454495	30.2295	91.0163	1.59017	5e-05	0.00109173	yes
Nop10	chr2:112261925-112262898	59.1545	177.557	1.58572	5e-05	0.00109173	yes
Twist2	chr1:91801476-91848027	20.9063	62.7053	1.58465	5e-05	0.00109173	yes
Tmem261	chr4:75277353-75278286	15.4873	46.4431	1.58438	0.0006	0.00756245	yes
Alkbh2	chr5:114123933-114128176	4.29743	12.8307	1.57805	0.0018	0.0163027	yes
Cox19	chr5:139337821-139345166	16.3404	48.776	1.57773	0.00055	0.00705333	yes
Cdca3	chr6:124830175-124833701	9.87734	29.3877	1.57302	0.00025	0.00395256	yes
Bcl7b	chr5:135168371-135181852	13.3686	39.7157	1.57086	5e-05	0.00109173	yes
Ino80e	chr7:126847552-126861463	20.5786	61.1234	1.57058	0.0003	0.00450652	yes
Col6a3	chr1:90766859-90843971	0.239501	0.708966	1.56568	0.0045	0.0311316	yes
Maff	chr15:79346620-79359076	8.15585	24.1016	1.56322	0.0002	0.00333722	yes
Myl12a	chr17:70993792-71002533	158.813	469.3	1.56319	0.00015	0.00264572	yes
Ninj1	chr13:49187546-49196251	14.3919	42.3904	1.55849	0.0002	0.00333722	yes
Atp5l	chr9:44913247-44920742	231.639	681.618	1.55709	0.0002	0.00333722	yes
Cox7a2	chr9:79755240-79759853	116.64	342.723	1.55497	0.0001	0.00193845	yes
Dexi	chr16:10530206-10543054	3.93198	11.541	1.55344	0.00175	0.015973	yes
Myeov2	chr1:92637144-92641985	78.2252	229.002	1.54966	0.0001	0.00193845	yes
Ankrd54	chr15:79053093-79062859	5.11108	14.9286	1.54637	0.0001	0.00193845	yes
Id1	chr2:152736250-152737410	10.5464	30.728	1.54281	0.0018	0.0163027	yes
Kctd17	chr15:78428563-78439303	11.2182	32.6593	1.54165	0.00015	0.00264572	yes
Eif4ebp1	chr8:27260326-27275656	158.867	462.485	1.54159	0.00015	0.00264572	yes
Aprt	chr8:122574636-122576907	73.3916	213.322	1.53934	5e-05	0.00109173	yes
Csrnp2	chr15:100479569-100495239	1.99923	5.80884	1.53881	0.0009	0.0101364	yes
Nme4	chr17:26091744-26095470	6.4796	18.8141	1.53784	0.00185	0.0165893	yes
Rilpl2	chr5:124463264-124478235	9.66601	28.0368	1.53633	0.00025	0.00395256	yes
Usmg5	chr19:47067747-47090625	265.077	768.03	1.53475	0.00035	0.00500786	yes
Hmgn2	chr4:133964738-133967991	29.0927	84.191	1.53301	5e-05	0.00109173	yes
Snhg6	chr1:9942024-9944118	37.1197	107.406	1.53282	0.00195	0.0173011	yes
1110007C09Rik	chr13:49202950-49216026	19.6602	56.867	1.53231	0.00015	0.00264572	yes
Atp5j2	chr5:145183705-145191592	281.313	813.554	1.53206	5e-05	0.00109173	yes
Klf2	chr8:72319061-72321654	2.41802	6.98862	1.53118	0.0032	0.0245048	yes
Tma7	chr9:109077987-109082381	98.2208	283.69	1.53021	0.00025	0.00395256	yes
2700094K13Rik	chr2:84669220-84670708	84.8527	244.303	1.52564	5e-05	0.00109173	yes
Magef1	chr16:21331899-21333356	3.65199	10.4986	1.52344	0.0038	0.0277776	yes
Chpf	chr1:75474568-75479471	19.0323	54.6143	1.52083	0.00015	0.00264572	yes
Ndufa12	chr10:94199008-94220948	120.119	344.08	1.51828	5e-05	0.00109173	yes
Timm13	chr10:80879815-80900969	38.9874	111.655	1.51796	0.0001	0.00193845	yes
Rplp1	chr9:61913282-61914510	2288.96	6518.3	1.5098	0.0022	0.0188226	yes
Fam96b	chr8:104639838-104641728	22.1456	63.0138	1.50865	0.00045	0.00613955	yes
Ppil1	chr17:29250834-29263971	11.448	32.5573	1.50789	0.00015	0.00264572	yes
Dancr	chr5:74093082-74094336	6.2337	17.7062	1.50609	0.003	0.0234783	yes
Sf3b5	chr10:13008449-13009183	29.222	82.8546	1.50353	0.00025	0.00395256	yes
Timm10b	chr7:105640539-105641845	15.9694	45.2685	1.5032	0.00045	0.00613955	yes
Eid2b	chr7:28277705-28280129	1.18935	3.36887	1.50209	0.0079	0.0454908	yes
Zfp362	chr4:128773084-128806112	1.13651	3.20881	1.49743	0.0039	0.0282102	yes
Ubald1	chr16:4874778-4879851	6.94588	19.6065	1.49711	0.00025	0.00395256	yes
Cdk1	chr10:69336634-69352912	26.4597	74.4729	1.49292	0.0003	0.00450652	yes
6030419C18Rik	chr9:58488602-58499742	6.01188	16.9027	1.49136	0.00025	0.00395256	yes
Fbxl14	chr6:119432530-119544347	5.28314	14.8412	1.49014	0.00015	0.00264572	yes
Fastk	chr5:24441039-24445235	25.4337	71.417	1.48953	0.00015	0.00264572	yes
Rpp21	chr17:36255672-36257846	10.2381	28.7286	1.48853	0.0057	0.036589	yes
Gm9776	chr13:94356748-94358923	1.59499	4.47321	1.48776	0.0065	0.0399976	yes
Reep4	chr14:70545250-70548935	15.0116	42.0401	1.48569	0.0001	0.00193845	yes
Snhg1	chr19:8723486-8726326	187.693	525.149	1.48435	0.00065	0.00799534	yes
Dnal4	chr15:79761448-79774467	4.22726	11.8149	1.48282	0.0019	0.0169471	yes
S100a16	chr3:90541222-90543151	43.6274	121.768	1.48083	0.0001	0.00193845	yes
Bax	chr7:45461694-45466898	59.3054	165.391	1.47964	5e-05	0.00109173	yes
D8Ertd82e	chr8:36094827-36147787	2.13257	5.94474	1.47902	0.0003	0.00450652	yes
Tle3	chr9:61372365-61418497	5.28473	14.7012	1.47603	0.00015	0.00264572	yes
Ssh1	chr5:113942218-113993757	3.69256	10.263	1.47476	0.0002	0.00333722	yes
Polr2k	chr15:36174009-36177012	31.6637	87.99	1.47451	0.0006	0.00756245	yes
Scarb1	chr5:125277086-125341094	18.9354	52.5698	1.47314	5e-05	0.00109173	yes
Manbal	chr2:157367593-157396763	9.11913	25.3147	1.47301	0.0008	0.00932302	yes
Cox7b	chrX:106015699-106022450	116.682	323.776	1.47242	0.0002	0.00333722	yes
Serf2	chr2:121449197-121456764	76.0749	211.083	1.47232	0.0004	0.0055673	yes
Banf1	chr19:5364632-5371511	95.7476	265.588	1.47188	0.00185	0.0165893	yes
Znrd1	chr17:36954357-36958428	17.1341	47.492	1.47081	0.00115	0.012008	yes
Letmd1	chr15:100469033-100479252	3.50267	9.69692	1.46907	0.00085	0.00976046	yes
Dtymk	chr1:93792575-93801934	68.0059	188.116	1.46789	0.0001	0.00193845	yes
BC022687	chr12:112808974-112816245	3.61906	9.99137	1.46507	0.0022	0.0188226	yes
Jdp2	chr12:85599104-85639878	25.4867	70.2716	1.4632	0.0002	0.00333722	yes
Ssna1	chr2:25271038-25272418	30.1358	82.8766	1.45949	0.00025	0.00395256	yes
Tmem106c	chr15:97964228-97970286	5.98091	16.4332	1.45817	0.0008	0.00932302	yes
Mrpl52	chr14:54426908-54429750	58.5937	160.955	1.45784	0.00055	0.00705333	yes
Mmp2	chr8:92827327-92853420	11.0763	30.4132	1.45722	0.00015	0.00264572	yes
Pttg1	chr11:43420247-43426248	21.7317	59.62	1.45599	0.0006	0.00756245	yes
Trim8	chr19:46501647-46516455	26.7856	73.4849	1.45599	0.0002	0.00333722	yes
Cox20	chr1:178319152-178322693	26.7141	73.1998	1.45424	0.0033	0.0250421	yes
Scand1	chr2:156311845-156375638	13.495	36.9644	1.45371	0.0015	0.0142676	yes
Hras	chr7:141189933-141194004	17.4565	47.6791	1.44959	0.0001	0.00193845	yes
Rpusd1	chr17:25727750-25731456	6.41426	17.5032	1.44827	0.00055	0.00705333	yes
Zfp513	chr5:31198980-31202303	6.40596	17.4452	1.44534	0.00025	0.00395256	yes
Arf5	chr6:28423639-28426499	28.7371	78.1805	1.44389	0.0002	0.00333722	yes
Polr2i	chr7:30232073-30236765	18.9448	51.3695	1.43911	0.0018	0.0163027	yes
Cmc2	chr8:116888684-116921436	8.2991	22.4978	1.43876	0.0008	0.00932302	yes
Psmg3	chr5:139823593-139826843	14.859	40.2724	1.43845	0.0012	0.0122047	yes
Nedd8	chr14:55662266-55671906	83.1777	225.263	1.43734	0.0001	0.00193845	yes
Cmtm7	chr9:114756835-114781993	16.5775	44.8939	1.43729	0.0005	0.00659944	yes
Sdc1	chr12:8771395-8793687	19.224	52.0355	1.43659	0.0002	0.00333722	yes
Tarbp2	chr15:102518191-102523676	4.90863	13.2444	1.432	0.00115	0.012008	yes
Cks1b	chr3:89415471-89418291	93.9198	253.182	1.43067	0.00015	0.00264572	yes
Mif	chr10:75859352-75860250	790.76	2130.16	1.42965	0.0006	0.00756245	yes
Tbx3	chr5:119670861-119684724	4.14169	11.1538	1.42924	0.00095	0.0105379	yes
C1qtnf6	chr15:78523345-78529651	2.31433	6.21121	1.42428	0.0025	0.0206377	yes
Avpi1	chr19:42123274-42128993	23.5593	62.9959	1.41896	0.0005	0.00659944	yes
Spc24	chr9:21755441-21760286	4.55104	12.1384	1.41531	0.00425	0.0298236	yes
Rundc3a	chr11:102393402-102402939	1.85962	4.95907	1.41506	0.00295	0.0231642	yes
Tcf19	chr17:35512734-35516824	14.0533	37.4723	1.41491	0.00035	0.00500786	yes
0610012G03Rik	chr16:31947050-31948521	13.3024	35.4312	1.41333	0.0008	0.00932302	yes
Sdhaf1	chr7:30321408-30322375	11.2231	29.863	1.41189	0.0017	0.015675	yes
Pkig	chr2:163658385-163726158	3.22961	8.58993	1.41129	0.0061	0.0383807	yes
Krtcap2	chr3:89246437-89249722	183.42	487.414	1.41	0.00045	0.00613955	yes
Ppapdc3	chr2:32095650-32110820	1.63222	4.33735	1.40998	0.0077	0.0448225	yes
Ptpmt1	chr2:90910712-90918050	14.9382	39.6412	1.40799	0.0007	0.0084424	yes
Lgals1	chr15:78926724-78930465	1149.04	3040.51	1.40389	0.006	0.0379548	yes
Socs1	chr16:10783808-10785536	2.90987	7.69413	1.4028	0.00865	0.0485251	yes
Ubtd1	chr19:41981762-42034641	11.6654	30.7693	1.39925	0.00035	0.00500786	yes
Csrnp1	chr9:119971165-119984658	3.26917	8.6182	1.39846	0.0012	0.0122047	yes
Birc5	chr11:117849236-117855743	57.3061	151.065	1.39841	0.00035	0.00500786	yes
Fam216a	chr5:122364583-122371963	23.2549	61.2816	1.39792	0.00085	0.00976046	yes
Klf16	chr10:80567120-80577296	5.09572	13.4179	1.3968	0.00085	0.00976046	yes
Polr1d	chr5:147077345-147111361	111.436	293.245	1.39589	0.00015	0.00264572	yes
Cdca4	chr12:112820234-112829389	17.5131	46.0415	1.3945	0.0001	0.00193845	yes
Dut	chr2:125247247-125259049	18.9959	49.7149	1.38799	0.00025	0.00395256	yes
Gm7367	chr11:116434093-116439077	16.0799	42.0833	1.38799	0.0055	0.0357942	yes
Klf4	chr4:55527136-55532475	10.3939	27.175	1.38655	0.0003	0.00450652	yes
Atp5g3	chr2:73908446-73911326	292.757	765.115	1.38597	0.0001	0.00193845	yes
Dclk2	chr3:86786149-86920884	5.7988	15.154	1.38587	0.00025	0.00395256	yes
Uck2	chr1:167226083-167285127	50.8205	132.745	1.38518	0.0004	0.0055673	yes
Vasp	chr7:19256929-19271854	29.8906	78.0644	1.38497	0.0004	0.0055673	yes
Rarg	chr15:102234937-102257522	20.2604	52.8897	1.38432	0.0002	0.00333722	yes
Zfp707	chr15:75969184-75975865	2.05337	5.35847	1.38383	0.00685	0.0414138	yes
Elavl1	chr8:4284781-4325100	17.9549	46.8526	1.38375	0.00055	0.00705333	yes
Gins1	chr2:150909593-150931280	6.98979	18.2175	1.382	0.0066	0.0403803	yes
Zfp703	chr8:26977335-26981462	9.62011	24.9896	1.3772	0.00015	0.00264572	yes
Ngfrap1	chrX:136270252-136271978	166.703	432.809	1.37645	0.00035	0.00500786	yes
Txn1	chr4:57943372-57956411	395.521	1026.55	1.37597	0.0013	0.0128761	yes
Prr3	chr17:35972538-35979825	5.83743	15.1286	1.37388	0.00065	0.00799534	yes
Zfp428	chr7:24507086-24515682	3.67887	9.52822	1.37295	0.0042	0.0296143	yes
Gata4	chr14:63198914-63245260	3.44623	8.91643	1.37145	0.00115	0.012008	yes
Pdlim2	chr14:70164217-70177672	19.7398	51.0658	1.37125	0.0005	0.00659944	yes
Cnih4	chr1:181150930-181168994	17.4078	45.0267	1.37105	0.0003	0.00450652	yes
Cdipt	chr7:126975913-126980501	35.1521	90.9015	1.37069	0.0002	0.00333722	yes
Gpaa1	chr15:76331293-76334899	6.01074	15.5417	1.37053	0.00115	0.012008	yes
Rbfa	chr18:80186238-80200619	4.90095	12.6699	1.37027	0.00325	0.0247586	yes
Pfn2	chr3:57841894-57847757	11.724	30.2992	1.36982	0.0009	0.0101364	yes
Rpl36	chr17:56613394-56614246	687.527	1776.57	1.36961	0.0001	0.00193845	yes
Sod1	chr16:90220741-90226324	210.289	542.303	1.36672	0.00035	0.00500786	yes
Glis2	chr16:4594712-4615957	5.70923	14.7072	1.36515	0.00065	0.00799534	yes
Stk40	chr4:126103956-126141029	3.8029	9.79104	1.36436	0.0011	0.0116727	yes
Tomm5	chr4:45105209-45108113	99.3372	255.396	1.36233	5e-05	0.00109173	yes
Mapkapk5	chr5:121525050-121545892	9.44439	24.2657	1.36139	0.00075	0.0088813	yes
Tor2a	chr2:32757025-32775633	9.34284	23.9736	1.35951	0.0012	0.0122047	yes
Tomm40	chr7:19701312-19715429	53.0402	135.933	1.35774	0.00025	0.00395256	yes
Kifc3	chr8:95081200-95142540	9.92136	25.4218	1.35746	0.0029	0.0229403	yes
Rhob	chr12:8497758-8499985	20.7589	53.1614	1.35665	0.00055	0.00705333	yes
Tyms	chr5:30058199-30073625	9.53262	24.4102	1.35654	0.0009	0.0101364	yes
Jund	chr8:70697738-70700616	23.1549	59.2811	1.35625	0.00015	0.00264572	yes
Rbm38	chr2:173021901-173034731	7.67932	19.6583	1.35609	0.001	0.0108869	yes
Rhoc	chr3:104789033-104794459	191.313	489.661	1.35585	0.00055	0.00705333	yes
Ost4	chr5:30888851-30907788	76.7418	196.318	1.35511	0.00185	0.0165893	yes
Sox12	chr2:152393611-152398046	3.77147	9.63577	1.35327	0.0003	0.00450652	yes
Shisa4	chr1:135371455-135375063	10.5306	26.8981	1.35291	0.0011	0.0116727	yes
Hs6st2	chrX:51386636-51681602	8.24661	21.0633	1.35285	0.00025	0.00395256	yes
Recql4	chr15:76701541-76710559	5.78523	14.7636	1.3516	0.0048	0.0327252	yes
Col1a1	chr11:94936269-94951856	23.9952	61.2289	1.35146	0.00055	0.00705333	yes
Apitd1	chr4:149128348-149137600	4.59159	11.7093	1.35059	0.0077	0.0448225	yes
Cuta	chr17:26937971-26939538	61.8677	157.769	1.35055	0.00045	0.00613955	yes
Pola2	chr19:5940542-5964206	18.8978	48.1688	1.34988	0.0004	0.0055673	yes
Gng8	chr7:16891785-16895435	7.67445	19.5597	1.34975	0.0049	0.0331378	yes
Tsc22d4	chr5:137745968-137768453	9.15221	23.3237	1.3496	0.0006	0.00756245	yes
Ap2s1	chr7:16738443-16749290	69.7196	177.548	1.34857	0.0009	0.0101364	yes
Mid1ip1	chrX:10717364-10719702	22.7497	57.9078	1.34791	0.00035	0.00500786	yes
Rps29	chr12:69157721-69159186	1296.32	3299.54	1.34785	0.0011	0.0116727	yes
Foxl1	chr8:121127684-121130644	4.05164	10.3087	1.34728	0.0021	0.0182731	yes
Nucks1	chr1:131910457-131936321	48.25	122.494	1.34411	0.0006	0.00756245	yes
Ndufa5	chr6:24518665-24527687	39.7653	100.823	1.34224	0.001	0.0108869	yes
Lsm4	chr8:70673230-70678752	64.8535	164.389	1.34186	0.00055	0.00705333	yes
Foxf2	chr13:31625815-31631406	6.53572	16.5447	1.33996	0.00125	0.0125502	yes
Thy1	chr9:44043383-44048579	67.689	171.174	1.33847	0.00055	0.00705333	yes
Smim20	chr5:53267105-53278540	18.464	46.5909	1.33533	0.00085	0.00976046	yes
2210013O21Rik	chrX:153723553-153741296	22.9535	57.9036	1.33494	0.00115	0.012008	yes
Tfap2a	chr13:40715302-40735162	3.46005	8.72283	1.33401	0.00205	0.0179712	yes
Hilpda	chr6:29272487-29275449	9.20131	23.1963	1.33398	0.00285	0.0226515	yes
Loxl1	chr9:58287722-58313212	14.756	37.0985	1.33006	0.00065	0.00799534	yes
Gtse1	chr15:85859706-85876573	4.14983	10.4269	1.32919	0.0016	0.0149405	yes
Uqcc2	chr17:27122664-27133891	159.663	400.004	1.32498	0.00045	0.00613955	yes
Dctpp1	chr7:127256958-127260667	30.2399	75.7187	1.3242	0.00165	0.0153464	yes
0610007P14Rik	chr12:85815454-85824545	23.8705	59.7441	1.32357	0.00075	0.0088813	yes
Wasf2	chr4:133130632-133198330	16.0652	40.1686	1.32213	0.0006	0.00756245	yes
Zdhhc8	chr16:18220752-18235136	7.40465	18.5027	1.32123	0.0007	0.0084424	yes
Maz	chr7:127022136-127026479	33.9264	84.6897	1.31978	0.00075	0.0088813	yes
Dgat2	chr7:99153662-99182713	2.58538	6.44929	1.31877	0.00595	0.0376994	yes
Abhd8	chr8:71456699-71463657	13.3161	33.1588	1.31622	0.00135	0.0132044	yes
Noc4l	chr5:110648418-110653382	12.3564	30.7414	1.31493	0.00115	0.012008	yes
Ubl5	chr9:20637748-20646789	11.8648	29.5182	1.31492	0.0042	0.0296143	yes
Tspyl4	chr10:34297420-34301320	3.19952	7.95665	1.31431	0.00125	0.0125502	yes
Tssc4	chr7:143069367-143071087	9.52323	23.6384	1.31161	0.0015	0.0142676	yes
Gltp	chr5:114669499-114690935	19.2242	47.7165	1.31157	0.0007	0.0084424	yes
B3gat3	chr19:8920392-8927236	11.1581	27.6894	1.31124	0.001	0.0108869	yes
Ciart	chr3:95871521-95891930	9.33879	23.1226	1.308	0.00245	0.020397	yes
Plod3	chr5:136982200-136996646	25.4167	62.9217	1.30778	0.0018	0.0163027	yes
2810408I11Rik	chr1:64679868-64690659	15.1359	37.4366	1.30647	0.00565	0.0363874	yes
Nelfa	chr5:33898179-33936258	9.22148	22.7903	1.30535	0.0009	0.0101364	yes
Rad51ap1	chr6:126923418-126939555	3.95651	9.7731	1.30459	0.0057	0.036589	yes
Tubb6	chr18:67390730-67402749	80.7179	199.266	1.30374	0.0008	0.00932302	yes
Peg12	chr7:62461870-62464510	6.5407	16.1401	1.30314	0.0012	0.0122047	yes
Ssc5d	chr7:4925843-4944797	1.19042	2.93629	1.30253	0.00635	0.0394257	yes
Prkrip1	chr5:136180356-136198954	7.54802	18.6022	1.3013	0.0016	0.0149405	yes
Agap3	chr5:24452176-24502047	14.9155	36.7461	1.30077	0.00045	0.00613955	yes
Aacs	chr5:125475872-125517403	27.5091	67.761	1.30055	0.00095	0.0105379	yes
Shb	chr4:45423275-45530828	12.5985	30.991	1.2986	0.00105	0.0112642	yes
Exosc8	chr3:54728678-54735364	41.8383	102.869	1.29791	0.00075	0.0088813	yes
Cdk2	chr10:128697938-128705051	20.0848	49.3696	1.29752	0.00055	0.00705333	yes
Ift27	chr15:78159462-78174108	5.90139	14.4986	1.29679	0.00795	0.0456892	yes
Basp1	chr15:25363276-25413764	56.8305	139.594	1.2965	0.00085	0.00976046	yes
H2afj	chr6:136808247-136810074	15.1253	37.1469	1.29628	0.0012	0.0122047	yes
Dmwd	chr7:19076199-19082775	12.4638	30.6085	1.29619	0.00065	0.00799534	yes
Col5a1	chr2:27886424-28039510	2.75779	6.7725	1.29617	0.0011	0.0116727	yes
Oaz1	chr10:80826655-80829290	188.644	462.625	1.29418	0.0034	0.0254881	yes
Mad2l1bp	chr17:46147384-46153551	6.18055	15.1432	1.29286	0.0061	0.0383807	yes
Phlda3	chr1:135766084-135769134	19.1708	46.9561	1.2924	0.001	0.0108869	yes
Bak1	chr17:27018034-27036378	23.4817	57.4843	1.29163	0.0007	0.0084424	yes
Cox8a	chr19:7215157-7217616	429.479	1050.72	1.29072	0.0005	0.00659944	yes
H2afx	chr9:44334714-44336073	25.6874	62.8234	1.29024	0.0006	0.00756245	yes
Txn2	chr15:77915050-77928994	48.5544	118.667	1.28925	0.00085	0.00976046	yes
Rpl37a	chr1:72711259-72713813	562.719	1375.09	1.28904	0.0012	0.0122047	yes
Copz2	chr11:96849875-96861202	19.524	47.6603	1.28754	0.00145	0.013996	yes
Lsm8	chr6:18848634-18854052	27.1947	66.3736	1.28729	0.00245	0.020397	yes
Pgp	chr17:24470472-24471596	17.7287	43.2543	1.28676	0.00155	0.0145896	yes
Dgcr6	chr16:18052859-18071632	11.2262	27.3779	1.28615	0.0011	0.0116727	yes
Arl2bp	chr8:94666599-94674457	19.0061	46.3454	1.28596	0.00105	0.0112642	yes
Ly6e	chr15:74955050-74959905	22.5389	54.9384	1.2854	0.0006	0.00756245	yes
Iscu	chr5:113772811-113778282	22.9194	55.8603	1.28526	0.0009	0.0101364	yes
Etv4	chr11:101769741-101785310	17.4784	42.5956	1.28513	0.0008	0.00932302	yes
Rpl22	chr4:152324435-152334082	99.8251	243.13	1.28426	0.00075	0.0088813	yes
Agfg2	chr5:137650480-137684753	6.93603	16.8931	1.28425	0.00215	0.0185434	yes
Sec61g	chr11:16501637-16508484	77.608	188.848	1.28295	0.0009	0.0101364	yes
Lbh	chr17:72918304-72941946	16.135	39.2187	1.28135	0.00125	0.0125502	yes
Agpat1	chr17:34605860-34615971	26.2237	63.6626	1.27957	0.00045	0.00613955	yes
Scarf2	chr16:17797281-17808287	14.2684	34.5817	1.27718	0.0009	0.0101364	yes
Efemp2	chr19:5474689-5481854	39.6022	95.977	1.27711	0.00045	0.00613955	yes
Tnfrsf12a	chr17:23660522-23677449	139.762	338.614	1.27667	0.0081	0.046257	yes
Epb4.1l4aos	chr18:33794891-33795989	19.871	48.1057	1.27554	0.0087	0.0486661	yes
1810009A15Rik	chr19:8883877-8890759	53.5564	129.518	1.27402	0.00175	0.015973	yes
Mrps21	chr3:95862651-95870619	108.308	261.896	1.27385	0.0014	0.0136254	yes
Ankrd13a	chr5:114775139-114805820	16.5271	39.9592	1.27369	0.0009	0.0101364	yes
Klf5	chr14:99298690-99313409	14.7628	35.6856	1.27338	0.00125	0.0125502	yes
Rps19	chr7:24884713-24889802	684.288	1654.04	1.27332	0.00355	0.0263769	yes
Pmf1	chr3:88394142-88410316	31.002	74.9353	1.27328	0.0011	0.0116727	yes
Grasp	chr15:101221190-101232756	3.00296	7.25587	1.27277	0.00705	0.0422964	yes
Apln	chrX:48025145-48034852	10.691	25.8218	1.2722	0.00075	0.0088813	yes
Tmem258	chr19:10204201-10207824	78.0851	188.316	1.27004	0.0012	0.0122047	yes
Gnb2	chr5:137528128-137533229	172.328	415.448	1.26951	0.001	0.0108869	yes
Hypk	chr2:121457087-121458440	87.0733	209.767	1.26848	0.00065	0.00799534	yes
Med26	chr8:72494558-72548310	4.29471	10.3451	1.26831	0.00185	0.0165893	yes
Atp5o	chr16:91925222-91931630	148.097	355.958	1.26516	0.00105	0.0112642	yes
Snrpd1	chr18:10617795-10628230	53.6429	128.894	1.26473	0.0012	0.0122047	yes
Ccdc92	chr5:124834431-124862221	3.62834	8.71418	1.26406	0.005	0.0335054	yes
Scaf4	chr16:90229143-90284425	4.95807	11.87	1.25947	0.0014	0.0136254	yes
Itpripl1	chr2:127138768-127143457	4.44652	10.6418	1.259	0.00125	0.0125502	yes
Rps27l	chr9:66946117-66949509	89.1112	213.184	1.25842	0.00085	0.00976046	yes
Etv5	chr16:22381312-22439570	10.1781	24.3455	1.25819	0.00065	0.00799534	yes
Arpc1b	chr5:145114255-145128186	353.936	846.137	1.2574	0.0036	0.0266473	yes
Snhg3	chr4:132351932-132353686	65.4906	156.554	1.2573	0.0025	0.0206377	yes
Pomp	chr5:147860627-147875778	114.315	273.253	1.25722	0.00115	0.012008	yes
Tmem41a	chr16:21934326-21947552	11.7025	27.921	1.25454	0.00255	0.0209621	yes
Lage3	chrX:74352161-74353618	17.056	40.6793	1.25402	0.0024	0.0201377	yes
Ssbp3	chr4:106911469-107049694	9.01778	21.5048	1.25382	0.00125	0.0125502	yes
Snrpd2	chr7:19149837-19152726	218.378	520.542	1.25319	0.00135	0.0132044	yes
Ndufb7	chr8:83566757-83571623	69.9149	166.262	1.24979	0.0014	0.0136254	yes
Traf4	chr11:78158422-78165550	7.02189	16.6704	1.24735	0.0019	0.0169471	yes
Prkab1	chr5:116013589-116024428	8.06553	19.1273	1.24579	0.0015	0.0142676	yes
1110038B12Rik	chr17:34950235-34952471	208.628	494.718	1.24567	0.00175	0.015973	yes
Acyp1	chr12:85272397-85280435	14.2622	33.7952	1.24463	0.00715	0.0426134	yes
Dusp8	chr7:142079486-142095284	3.86268	9.13367	1.24159	0.0032	0.0245048	yes
Ift22	chr5:136908149-136913244	14.3298	33.834	1.23946	0.00255	0.0209621	yes
Mrps26	chr2:130563756-130565394	24.3377	57.4575	1.2393	0.0022	0.0188226	yes
B3glct	chr5:149678256-149762599	1.69517	4.00086	1.23888	0.00655	0.0402421	yes
Elmo1	chr13:20090506-20608356	1.38496	3.26865	1.23885	0.00805	0.0460835	yes
Emd	chrX:74254686-74257893	41.168	97.131	1.23841	0.00115	0.012008	yes
Kcnn4	chr7:24370262-24385212	23.1085	54.5188	1.23833	0.0013	0.0128761	yes
Pim3	chr15:88862193-88865726	10.6062	25.0164	1.23797	0.0021	0.0182731	yes
Tmem109	chr19:10870660-10881743	14.8964	35.1331	1.23787	0.0016	0.0149405	yes
Chchd6	chr6:89383145-89595652	5.37003	12.662	1.2375	0.00825	0.0468178	yes
Smg9	chr7:24399627-24422777	5.39794	12.7179	1.23638	0.00285	0.0226515	yes
Mrps12	chr7:28739640-28741781	21.8132	51.333	1.23468	0.0034	0.0254881	yes
E130309D02Rik	chr5:143301071-143315360	10.9832	25.8445	1.23455	0.0021	0.0182731	yes
Tex264	chr9:106658745-106685952	32.3067	76.0032	1.23422	0.00135	0.0132044	yes
Rita1	chr5:120609059-120612589	3.86421	9.08361	1.23309	0.00495	0.0333224	yes
Pabpn1	chr14:54894142-54898927	50.2665	118.094	1.23227	0.001	0.0108869	yes
Chchd2	chr5:129881160-129887470	160.773	377.698	1.23221	0.00085	0.00976046	yes
Msrb1	chr17:24736641-24742778	29.1777	68.3701	1.2285	0.002	0.0176913	yes
Lsm2	chr17:34981853-34985893	20.3228	47.6171	1.22838	0.00355	0.0263769	yes
Snrpf	chr10:93540631-93605245	93.7437	219.452	1.22711	0.00155	0.0145896	yes
Fam69b	chr2:26628456-26636497	12.9639	30.2948	1.22457	0.0015	0.0142676	yes
1810058I24Rik	chr6:35252698-35262059	20.7283	48.4134	1.2238	0.00265	0.0214983	yes
Tspo	chr15:83563572-83574203	70.6265	164.949	1.22373	0.00145	0.013996	yes
Tmem184b	chr15:79360683-79403303	19.2528	44.9535	1.22337	0.0009	0.0101364	yes
Ube2m	chr7:13035119-13038275	95.5593	222.527	1.21951	0.0008	0.00932302	yes
Alyref	chr11:120594515-120598365	98.469	229.08	1.21811	0.001	0.0108869	yes
Limd2	chr11:106156255-106160142	5.49237	12.7718	1.21747	0.00325	0.0247586	yes
E2f8	chr7:48866428-48881041	4.87392	11.3234	1.21616	0.00155	0.0145896	yes
Bola2	chr7:126695999-126696693	92.471	214.806	1.21596	0.00295	0.0231642	yes
Srf	chr17:46546838-46556162	7.97147	18.493	1.21406	0.00145	0.013996	yes
Mogs	chr6:83115505-83118898	9.23855	21.4194	1.21318	0.00135	0.0132044	yes
Sh2b3	chr5:121815480-121836859	9.3937	21.7779	1.2131	0.002	0.0176913	yes
Selm	chr11:3514701-3517351	34.0147	78.7038	1.21027	0.00215	0.0185434	yes
Clmp	chr9:40685963-40784046	3.89164	9.00173	1.20982	0.00435	0.0303621	yes
D8Ertd738e	chr8:84246234-84249761	56.7718	131.223	1.20877	0.0015	0.0142676	yes
Ndufb2	chr6:39592582-39599471	33.5953	77.5678	1.2072	0.00675	0.0409567	yes
Slc25a39	chr11:102402975-102407517	103.357	238.595	1.20693	0.00185	0.0165893	yes
Tmem171	chr13:98686237-98694831	18.8931	43.5933	1.20625	0.00565	0.0363874	yes
Hsbp1	chr8:119344537-119348929	55.6665	128.421	1.206	0.0017	0.015675	yes
Ppt2	chr17:34616661-34628279	4.12383	9.51349	1.20599	0.0067	0.0408009	yes
B4galt7	chr13:55600110-55609954	8.65892	19.937	1.20319	0.00435	0.0303621	yes
Zfp593	chr4:134243305-134245873	4.20512	9.68146	1.20308	0.0076	0.0444386	yes
Nosip	chr7:45062428-45078503	11.8697	27.2936	1.20128	0.00185	0.0165893	yes
1810011O10Rik	chr8:24437615-24438946	11.8609	27.2541	1.20026	0.0052	0.0343364	yes
Mettl1	chr10:127041931-127045461	23.5688	54.1045	1.19887	0.0037	0.027233	yes
Phf19	chr2:34893754-34913976	2.74785	6.30631	1.1985	0.00375	0.0274977	yes
Uqcr11	chr10:80402996-80406821	178.347	408.735	1.19648	0.00175	0.015973	yes
Efhd2	chr4:141858141-141874920	12.4156	28.4328	1.1954	0.00245	0.020397	yes
Smim12	chr4:127243783-127247809	9.42445	21.5529	1.1934	0.006	0.0379548	yes
S100a10	chr3:93555116-93564645	498.852	1140.69	1.19322	0.00335	0.0252421	yes
Mcm4	chr16:15623896-15637400	15.6275	35.7338	1.1932	0.0017	0.015675	yes
Ndufa6	chr15:82350138-82354291	62.4378	142.607	1.19156	0.00325	0.0247586	yes
Map3k10	chr7:27656374-27674581	5.04909	11.527	1.19092	0.003	0.0234783	yes
Rfc2	chr5:134582689-134598328	24.8129	56.6387	1.1907	0.00165	0.0153464	yes
Nme1	chr11:93958924-93968521	165.687	378.1	1.19031	0.00275	0.0221262	yes
Bbc3	chr7:16309582-16318334	4.27583	9.75297	1.18964	0.00395	0.0284492	yes
St3gal1	chr15:67102874-67176882	5.65971	12.9	1.18857	0.00245	0.020397	yes
Repin1	chr6:48593882-48599082	5.42028	12.3533	1.18846	0.00305	0.0237589	yes
Itga5	chr15:103344285-103366748	10.4463	23.7903	1.18738	0.0017	0.015675	yes
Cdk5	chr5:24418241-24423530	12.3493	28.1218	1.18726	0.0024	0.0201377	yes
Anks3	chr16:4941414-4964237	3.78498	8.61564	1.18667	0.00605	0.0382093	yes
Rps28	chr17:33823036-33824498	1288.06	2930.93	1.18616	0.0023	0.0195217	yes
Emx2	chr19:59458689-59465357	3.02224	6.87324	1.18537	0.0074	0.0436166	yes
Erdr1	chrY:90785441-90816465	38.0397	86.3779	1.18316	0.00245	0.020397	yes
Psrc1	chr3:108383803-108388231	4.12287	9.35613	1.18226	0.00725	0.0429913	yes
Lsm12	chr11:102163488-102185256	52.3303	118.711	1.18173	0.00175	0.015973	yes
Mvd	chr8:122433595-122443422	8.88205	20.1385	1.18099	0.0032	0.0245048	yes
Cebpb	chr2:167688914-167690432	93.9319	212.882	1.18037	0.0015	0.0142676	yes
Fam89b	chr19:5728086-5729666	32.226	73.011	1.17989	0.00175	0.015973	yes
Rpl37	chr15:5116612-5119140	367.752	832.485	1.17869	0.0017	0.015675	yes
Mrpl54	chr10:81264721-81266926	36.6656	82.9904	1.17852	0.00335	0.0252421	yes
Rab35	chr5:115631986-115647158	22.5791	51.0927	1.17813	0.00115	0.012008	yes
Pstpip1	chr9:56089975-56128890	4.30968	9.74998	1.17782	0.00825	0.0468178	yes
Hmgb2	chr8:57511842-57515999	36.9162	83.5122	1.17773	0.0025	0.0206377	yes
Usp30	chr5:114100332-114122924	7.10119	16.0642	1.17771	0.0022	0.0188226	yes
Nsdhl	chrX:72918520-72958528	29.5276	66.778	1.17731	0.00265	0.0214983	yes
Nutf2-ps1	chr8:105860633-105880401	83.6439	188.975	1.17586	0.00525	0.0345694	yes
Commd9	chr2:101886261-101901639	14.1393	31.9314	1.17527	0.00395	0.0284492	yes
Fst	chr13:114452261-114458951	6.60488	14.915	1.17515	0.00435	0.0303621	yes
Ube2d1	chr10:71254979-71285262	17.1121	38.6121	1.17404	0.0021	0.0182731	yes
Tm2d2	chr8:25017210-25023260	24.5064	55.2896	1.17385	0.0024	0.0201377	yes
Mt1	chr8:94179088-94180327	267.892	604.389	1.17383	0.00235	0.0198458	yes
E2f7	chr10:110745464-110787384	5.30275	11.9626	1.17372	0.0027	0.0218286	yes
Sesn2	chr4:132492806-132510456	7.12653	16.0591	1.17212	0.00215	0.0185434	yes
Dynlrb1	chr2:155236532-155250277	146.254	329.521	1.17189	0.0017	0.015675	yes
Gja1	chr10:56377299-56390419	54.0516	121.709	1.17102	0.00265	0.0214983	yes
Nxt1	chr2:148672614-148676026	20.8556	46.9523	1.17076	0.00395	0.0284492	yes
Slc35a4	chr18:36671158-36683862	14.7082	33.1086	1.17059	0.0028	0.0223752	yes
Atp5e	chr2:174461074-174464101	195.708	440.474	1.17035	0.00155	0.0145896	yes
Ctdsp1	chr1:74391608-74397285	23.4363	52.6877	1.16872	0.0013	0.0128761	yes
Paxip1	chr5:27740080-27791550	6.55257	14.7151	1.16716	0.00155	0.0145896	yes
Ssr2	chr3:88579670-88588413	68.5012	153.796	1.16681	0.0024	0.0201377	yes
Slc39a13	chr2:91061780-91070315	32.0275	71.8846	1.16637	0.0018	0.0163027	yes
Prrg4	chr2:104830740-104849850	6.95225	15.5911	1.16517	0.00315	0.0242643	yes
Trerf1	chr17:47140941-47359458	3.55791	7.97509	1.16447	0.0036	0.0266473	yes
Uqcrq	chr11:53428947-53430831	231.305	518.267	1.1639	0.00155	0.0145896	yes
Zfp64	chr2:168925360-168955587	10.7836	24.1584	1.16368	0.0034	0.0254881	yes
Gemin7	chr7:19564948-19573343	28.1316	63.0153	1.16351	0.00325	0.0247586	yes
Pin1	chr9:20652129-20666584	6.58915	14.7521	1.16275	0.00265	0.0214983	yes
Tbkbp1	chr11:97136170-97149712	4.21806	9.42798	1.16037	0.00315	0.0242643	yes
Pvrl2	chr7:19716643-19749573	16.2673	36.3453	1.15979	0.0017	0.015675	yes
Nrm	chr17:35861317-35865400	6.42905	14.3599	1.15936	0.0074	0.0436166	yes
Siah2	chr3:58674948-58692388	18.3496	40.9734	1.15894	0.00305	0.0237589	yes
Mapk8ip1	chr2:92383675-92401263	18.053	40.3034	1.15866	0.0015	0.0142676	yes
Ccdc12	chr9:110656502-110711593	9.97505	22.2664	1.15847	0.00845	0.0476077	yes
Stub1	chr17:25829042-25833361	57.6267	128.507	1.15703	0.00205	0.0179712	yes
Prkaca	chr8:83972977-83996442	29.8715	66.5872	1.15647	0.0013	0.0128761	yes
Gkap1	chr13:58233350-58274188	6.84594	15.2486	1.15536	0.00645	0.0397942	yes
Urm1	chr2:29827388-29844996	7.98878	17.7837	1.15451	0.00405	0.0289564	yes
Sssca1	chr19:5730305-5731732	22.4818	50.0272	1.15395	0.00455	0.0313851	yes
Chaf1b	chr16:93883900-93906106	19.6624	43.7506	1.15387	0.0028	0.0223752	yes
Szrd1	chr4:141112977-141139796	19.3446	43.0193	1.15305	0.0016	0.0149405	yes
Pdpn	chr4:143267408-143299564	26.0839	57.8549	1.14928	0.00145	0.013996	yes
Tmem129	chr5:33653215-33657832	9.21748	20.4423	1.14911	0.00355	0.0263769	yes
Ifitm2	chr7:140954838-140955961	193.334	428.761	1.14908	0.0028	0.0223752	yes
Snhg18	chr15:32240567-32244662	8.15627	18.0533	1.14628	0.00605	0.0382093	yes
Coro1c	chr5:113842438-113908706	24.5655	54.36	1.14591	0.0026	0.0212541	yes
2810428I15Rik	chr8:70504295-70506739	68.4472	151.448	1.14576	0.00295	0.0231642	yes
2310061I04Rik	chr17:35892676-35897378	15.1324	33.456	1.14462	0.00295	0.0231642	yes
Plaur	chr7:24462499-24475873	66.624	147.244	1.14409	0.0023	0.0195217	yes
Stk19	chr17:34823992-34836903	10.179	22.4823	1.14319	0.00885	0.0492239	yes
Apcdd1	chr18:62922326-62953195	3.40201	7.51074	1.14257	0.0088	0.049062	yes
Arl6ip4	chr5:124116107-124118195	19.4809	42.9873	1.14185	0.0034	0.0254881	yes
Itpa	chr2:130667840-130681614	30.4297	67.1419	1.14173	0.00295	0.0231642	yes
Orai2	chr5:136147460-136170656	6.19282	13.6381	1.13897	0.00375	0.0274977	yes
Cdr2l	chr11:115381915-115396132	19.6829	43.34	1.13876	0.00205	0.0179712	yes
Chst14	chr2:118926496-118928583	13.4088	29.4546	1.13531	0.00355	0.0263769	yes
Junb	chr8:84976908-84978748	14.1702	31.1067	1.13437	0.0039	0.0282102	yes
Ube2c	chr2:164769928-164772902	93.8446	205.685	1.13209	0.00265	0.0214983	yes
Plekhj1	chr10:80796098-80798626	20.6364	45.2051	1.13129	0.0029	0.0229403	yes
Ctnnbip1	chr4:149518240-149566437	5.77912	12.6449	1.12963	0.00475	0.0324786	yes
Setd8	chr5:124439929-124462307	78.86	172.444	1.12876	0.00545	0.0355871	yes
Sphk2	chr7:45705246-45718002	8.11326	17.7388	1.12855	0.00855	0.0480559	yes
Mrpl28	chr17:26123502-26126613	62.2336	135.976	1.12758	0.0028	0.0223752	yes
Cldnd1	chr16:58727909-58734247	31.8477	69.5744	1.12737	0.00275	0.0221262	yes
Ccdc124	chr8:70868226-70873490	37.5266	81.9577	1.12696	0.00285	0.0226515	yes
Gadd45b	chr10:80930090-80932204	25.6153	55.909	1.12608	0.0037	0.027233	yes
Snhg17	chr2:158353699-158361522	11.349	24.7686	1.12594	0.00185	0.0165893	yes
Mmp11	chr10:75923221-75932502	10.2662	22.394	1.1252	0.0038	0.0277776	yes
Sema3b	chr9:107597673-107609241	3.29094	7.16548	1.12256	0.0052	0.0343364	yes
Sf3b4	chr3:96172505-96177564	57.978	126.204	1.12218	0.00355	0.0263769	yes
Sf3a2	chr10:80798734-80804922	21.5924	46.8343	1.11704	0.0029	0.0229403	yes
Cyc1	chr15:76343522-76345934	72.2207	156.594	1.11655	0.00335	0.0252421	yes
Dhcr24	chr4:106561037-106589113	22.135	47.9855	1.11627	0.0045	0.0311316	yes
Bcl2l1	chr2:152754172-152831728	38.2016	82.7606	1.11531	0.00485	0.0329514	yes
Psenen	chr7:30561865-30563184	69.0914	149.66	1.11511	0.00315	0.0242643	yes
Rhod	chr19:4425456-4477143	18.8872	40.8875	1.11425	0.0053	0.03484	yes
Gga1	chr15:78877189-78894585	8.5863	18.5776	1.11345	0.004	0.0287037	yes
Lpcat4	chr2:112239840-112247111	21.2128	45.8633	1.1124	0.00365	0.0269834	yes
Cops7b	chr1:86587099-86606500	8.2375	17.8073	1.11219	0.0049	0.0331378	yes
Pcolce	chr5:137605106-137611404	145.389	313.839	1.11011	0.0042	0.0296143	yes
Lmo4	chr3:144188529-144205255	51.6798	111.554	1.11008	0.0076	0.0444386	yes
Pxn	chr5:115506675-115555987	19.7674	42.6616	1.10982	0.00265	0.0214983	yes
Snhg7	chr2:26637175-26640244	18.6316	40.1745	1.10853	0.00705	0.0422964	yes
Akt1	chr12:112653820-112674276	83.681	180.265	1.10715	0.00335	0.0252421	yes
Cdkn2c	chr4:109660875-109666756	18.11	39.0092	1.10703	0.0073	0.0432006	yes
Otud1	chr2:19658061-19660590	24.4666	52.6468	1.10553	0.00485	0.0329514	yes
Arl4c	chr1:88698225-88702191	22.4426	48.2778	1.10512	0.00325	0.0247586	yes
Pacsin3	chr2:91256164-91264680	19.2622	41.4087	1.10416	0.00335	0.0252421	yes
Sod2	chr17:13007838-13018119	29.7542	63.9183	1.10314	0.00305	0.0237589	yes
Dad1	chr14:54235484-54253929	43.2502	92.7554	1.10073	0.0055	0.0357942	yes
Nfkbib	chr7:28756173-28766644	17.9831	38.5414	1.09977	0.0039	0.0282102	yes
Ext1	chr15:53068260-53346183	17.2572	36.9649	1.09896	0.0026	0.0212541	yes
Zfp36l1	chr12:80107759-80113013	11.0902	23.7509	1.09869	0.00575	0.0367493	yes
Zbtb7b	chr3:89377645-89398779	13.3772	28.6465	1.09858	0.00355	0.0263769	yes
Cox5b	chr1:36691486-36693388	196.589	420.721	1.09768	0.0029	0.0229403	yes
Rnf166	chr8:122466146-122476064	6.84723	14.6432	1.09664	0.0081	0.046257	yes
Fgfr1	chr8:25518758-25575718	18.8328	40.2033	1.09406	0.00325	0.0247586	yes
Get4	chr5:139252323-139270050	37.2491	79.4621	1.09306	0.003	0.0234783	yes
Cmtm3	chr8:104340593-104347672	37.0655	79.052	1.09273	0.00385	0.027969	yes
Espl1	chr15:102296292-102324356	5.69406	12.1313	1.0912	0.0044	0.030602	yes
Polr2d	chr18:31789158-31796701	17.0776	36.3712	1.09069	0.00885	0.0492239	yes
Dazap2	chr15:100615661-100620761	63.5408	135.303	1.09044	0.0033	0.0250421	yes
Capns1	chr7:30186941-30195048	192.698	410.27	1.09023	0.0057	0.036589	yes
Tecr	chr8:83571697-83594491	67.3274	143.227	1.08904	0.00265	0.0214983	yes
Arid1b	chr17:4995073-5347656	4.91716	10.4527	1.08798	0.00415	0.0294207	yes
Krt80	chr15:101349570-101370125	6.80369	14.4611	1.08779	0.0069	0.0415876	yes
Tbca	chr13:94788942-94842899	182.786	388.425	1.08748	0.00465	0.0319249	yes
Cox6c	chr15:35931975-35938246	270.67	575.171	1.08746	0.00415	0.0294207	yes
Prdx2	chr8:84969647-84974313	201.041	427.152	1.08726	0.0044	0.030602	yes
Fau	chr19:6057887-6059524	682.633	1448.92	1.08579	0.0049	0.0331378	yes
2310036O22Rik	chr8:85026832-85030286	61.2543	130.013	1.08577	0.0042	0.0296143	yes
Asb6	chr2:30823097-30828300	10.2239	21.6781	1.08429	0.0047	0.0321929	yes
St6galnac6	chr2:32599708-32620809	15.2511	32.3349	1.08418	0.00495	0.0333224	yes
Siva1	chr12:112644827-112649152	40.0295	84.8414	1.0837	0.00495	0.0333224	yes
Ywhah	chr5:33018815-33027966	75.9093	160.597	1.0811	0.00465	0.0319249	yes
Tmsb4x	chrX:167207093-167209218	475.505	1005	1.07966	0.0063	0.0391774	yes
Mpc2	chr1:165461207-165481214	28.1829	59.4944	1.07794	0.0087	0.0486661	yes
Tmem256	chr11:69838524-69839558	88.5003	186.72	1.07712	0.00585	0.0372264	yes
Mrps16	chr14:20391230-20393555	38.3009	80.7922	1.07684	0.00815	0.0464072	yes
Crtap	chr9:114368323-114390712	13.8235	29.1591	1.07682	0.00395	0.0284492	yes
Rps6ka4	chr19:6829083-6840627	24.0682	50.7273	1.07563	0.0029	0.0229403	yes
Lmnb1	chr18:56707812-56753424	12.4029	26.1387	1.07551	0.0038	0.0277776	yes
Dcaf15	chr8:84097071-84104762	12.3768	26.0733	1.07494	0.0055	0.0357942	yes
Rps27rt	chr3:90212666-90213648	1422.49	2994.84	1.07407	0.0089	0.0494085	yes
Atp6v0c	chr17:24163864-24169429	221.608	466.485	1.07382	0.00505	0.0337059	yes
Higd2a	chr13:54590230-54591147	85.9589	180.928	1.0737	0.004	0.0287037	yes
Cltb	chr13:54592938-54611272	28.4884	59.9549	1.0735	0.0041	0.0291542	yes
Mrpl14	chr17:45686371-45698495	37.1101	78.0455	1.0725	0.00895	0.0496391	yes
Rps13	chr7:116331506-116334190	786.423	1653.37	1.07204	0.00755	0.0442564	yes
Tnfrsf1a	chr6:125349722-125362483	23.7295	49.8737	1.0716	0.0049	0.0331378	yes
Ltbr	chr6:125306570-125313870	17.8637	37.509	1.07021	0.0057	0.036589	yes
Vps28	chr15:76622085-76626084	28.9271	60.7222	1.0698	0.00455	0.0313851	yes
Med10	chr13:69809881-69816094	63.6106	133.494	1.06944	0.0041	0.0291542	yes
Maea	chr5:33335571-33373294	43.3824	90.8776	1.06681	0.00425	0.0298236	yes
H2afz	chr3:137864486-137866922	498.76	1044.04	1.06576	0.0088	0.049062	yes
Trip6	chr5:137309898-137314241	60.6843	126.975	1.06515	0.0045	0.0311316	yes
Ndufb6	chr4:40270662-40279368	117.223	245.091	1.06407	0.0051	0.0339048	yes
1110008P14Rik	chr2:32379100-32381915	56.7973	118.686	1.06325	0.0064	0.0395897	yes
Tcf3	chr10:80409164-80433653	22.9507	47.9177	1.06202	0.0045	0.0311316	yes
Cinp	chr12:110872609-110889145	11.4346	23.8635	1.06141	0.007	0.0420824	yes
Rnf220	chr4:117271463-117496915	12.3874	25.8124	1.05919	0.00465	0.0319249	yes
Foxp1	chr6:98925341-99435345	6.75098	14.0601	1.05843	0.00515	0.0341405	yes
Ube2s	chr7:4808013-4812340	110.605	229.993	1.05617	0.0048	0.0327252	yes
Rilpl1	chr5:124493079-124531391	8.50682	17.6799	1.05542	0.0063	0.0391774	yes
Rpl39	chrX:37082519-37085184	1911.63	3971.73	1.05496	0.0075	0.0440292	yes
Mcm5	chr8:75109508-75128439	23.7929	49.4206	1.05458	0.00495	0.0333224	yes
Med28	chr5:45520228-45529284	10.7338	22.2933	1.05445	0.00425	0.0298236	yes
Cox6b1	chr7:30616973-30626151	347.796	721.873	1.0535	0.0051	0.0339048	yes
Clpp	chr17:56990263-56996371	29.1154	60.3755	1.05218	0.00525	0.0345694	yes
Msantd3	chr4:48539945-48561920	14.6567	30.3718	1.05117	0.0067	0.0408009	yes
Mtx1	chr3:89209080-89214335	17.4687	36.1761	1.05027	0.00545	0.0355871	yes
Kdelr2	chr5:143403819-143421904	73.3475	151.671	1.04812	0.0065	0.0399976	yes
Mcc	chr18:44425059-44812182	9.87209	20.3886	1.04633	0.0058	0.0370286	yes
Sorbs3	chr14:70180467-70207671	16.7308	34.4781	1.04318	0.00695	0.0418246	yes
Slc25a1	chr16:17925210-17928219	17.2287	35.4449	1.04077	0.0083	0.0470333	yes
Lrig3	chr10:125966218-126015359	7.76832	15.9704	1.03972	0.00645	0.0397942	yes
Pea15a	chr1:172196728-172206781	51.0614	104.81	1.03748	0.0055	0.0357942	yes
Tead2	chr7:45215752-45233619	20.4128	41.8971	1.03737	0.0056	0.0361844	yes
Mrpl18	chr17:12911354-12916091	29.0861	59.6343	1.03581	0.00865	0.0485251	yes
Cycs	chr6:50562562-50566474	39.3601	80.6861	1.03559	0.0061	0.0383807	yes
Mrpl12	chr11:120484668-120488754	66.6257	136.501	1.03476	0.0059	0.0374837	yes
Eef1d	chr15:75894795-75909556	60.5572	123.999	1.03396	0.0052	0.0343364	yes
Mlf2	chr6:124931387-124936149	62.8199	128.629	1.03393	0.00435	0.0303621	yes
Dhcr7	chr7:143823166-143848410	11.54	23.6274	1.03382	0.00725	0.0429913	yes
B4galt3	chr1:171270327-171276895	8.75528	17.9018	1.03188	0.0078	0.0451808	yes
Rnd1	chr15:98669204-98677461	23.4457	47.8841	1.03023	0.00575	0.0367493	yes
Tyro3	chr2:119797739-119818103	6.98321	14.2587	1.02988	0.00665	0.0406016	yes
Gabarapl1	chr6:129532183-129542331	33.075	67.5262	1.02971	0.00495	0.0333224	yes
Prkcdbp	chr7:105480615-105482197	66.0206	134.773	1.02955	0.0054	0.0353392	yes
Mknk2	chr10:80665317-80676293	23.3794	47.7215	1.0294	0.0074	0.0436166	yes
Igfbp6	chr15:102144185-102149512	74.7573	151.961	1.02342	0.00645	0.0397942	yes
Mrpl4	chr9:21002736-21008837	20.8853	42.4374	1.02285	0.0082	0.0466467	yes
Ssr4	chrX:73787027-73790828	131.034	265.896	1.02091	0.00595	0.0376994	yes
Ranbp1	chr16:18239978-18248694	124.427	252.481	1.02088	0.00785	0.0453363	yes
Irf2bpl	chr12:86880702-86884814	11.0241	22.3562	1.02002	0.00845	0.0476077	yes
Dusp6	chr10:99263230-99267489	10.4798	21.2512	1.01993	0.0089	0.0494085	yes
Mydgf	chr17:56176540-56183920	56.8442	115.195	1.019	0.00785	0.0453363	yes
Drap1	chr19:5406814-5424979	57.7731	116.85	1.01618	0.0063	0.0391774	yes
Tor1a	chr2:30960560-30967918	19.5052	39.4298	1.01542	0.0079	0.0454908	yes
Sppl3	chr5:115011523-115098790	22.359	45.1628	1.01428	0.0059	0.0374837	yes
Atp5g2	chr15:102662867-102671047	242.388	489.043	1.01264	0.00675	0.0409567	yes
Arpc3	chr5:122391927-122406178	85.6759	172.832	1.01241	0.0065	0.0399976	yes
Snx33	chr9:56917199-56928371	17.4977	35.244	1.01021	0.00505	0.0337059	yes
E2f1	chr2:154559399-154569892	18.9183	38.0984	1.00995	0.0071	0.0424446	yes
Gsk3a	chr7:25228258-25237851	24.5122	49.2895	1.00778	0.00875	0.0489225	yes
Tpst1	chr5:130073325-130135733	14.8595	29.8776	1.00768	0.0088	0.049062	yes
Wbp11	chr6:136813653-136828216	15.2431	30.6308	1.00682	0.0073	0.0432006	yes
Ak2	chr4:128993223-129011529	26.0464	52.0998	1.0002	0.00805	0.0460835	yes
Zfp280c	chrX:48541625-48594452	35.4667	17.7323	-1.00008	0.0071	0.0424446	yes
Bdp1	chr13:100017993-100104070	8.04649	4.02267	-1.00021	0.00705	0.0422964	yes
Sltm	chr9:70542777-70592232	40.6636	20.3127	-1.00136	0.00505	0.0337059	yes
Bclaf1	chr10:20312468-20342501	54.371	27.1556	-1.00159	0.00615	0.0385713	yes
Lonrf3	chrX:36328408-36366856	25.4458	12.699	-1.00271	0.0066	0.0403803	yes
Zc3h15	chr2:83644577-83664616	120.742	60.2134	-1.00377	0.00845	0.0476077	yes
Nedd1	chr10:92684744-92722418	36.6778	18.2906	-1.00381	0.00715	0.0426134	yes
Ocrl	chrX:47912455-47965866	28.3344	14.1268	-1.00412	0.0069	0.0415876	yes
Wdr75	chr1:45795500-45823613	73.7494	36.6723	-1.00794	0.00825	0.0468178	yes
Wnk1	chr6:119923968-120038655	56.1622	27.9258	-1.008	0.0087	0.0486661	yes
Phf3	chr1:30802341-30863256	23.3508	11.6101	-1.00809	0.00585	0.0372264	yes
Ice1	chr13:70588688-70637634	23.256	11.5477	-1.01	0.0051	0.0339048	yes
Arhgap35	chr7:16494472-16614993	38.7865	19.2589	-1.01003	0.00835	0.0472255	yes
Gmds	chr13:31819585-32338544	108.27	53.7306	-1.01081	0.006	0.0379548	yes
2900097C17Rik	chr2:156388062-156392979	100.821	50.0149	-1.01137	0.00745	0.0438453	yes
Golim4	chr3:75876182-75956949	47.1397	23.376	-1.01192	0.00575	0.0367493	yes
Scfd1	chr12:51377512-51450102	38.6731	19.1774	-1.01192	0.0073	0.0432006	yes
Vwa8	chr14:78849177-79202310	20.8323	10.3224	-1.01304	0.0083	0.0470333	yes
Nampt	chr12:32820334-32853369	47.047	23.2882	-1.0145	0.0063	0.0391774	yes
Zcchc7	chr4:44756558-44932214	21.831	10.8015	-1.01515	0.00805	0.0460835	yes
Mapk9	chr11:49846750-49886421	24.8107	12.2688	-1.01597	0.0064	0.0395897	yes
Dnm1l	chr16:16312227-16359031	50.0378	24.7227	-1.01718	0.0056	0.0361844	yes
Ftsj3	chr11:106249143-106255802	91.4388	45.1726	-1.01736	0.00615	0.0385713	yes
Dock7	chr4:98936658-99120915	40.7688	20.1316	-1.01801	0.0059	0.0374837	yes
Ripk1	chr13:34002873-34035170	16.4651	8.12792	-1.01845	0.0079	0.0454908	yes
Cggbp1	chr16:64852084-64859491	52.0096	25.6659	-1.01892	0.0064	0.0395897	yes
Atf7ip	chr6:136518850-136607379	14.3897	7.10027	-1.01909	0.0062	0.0387814	yes
Tbcd	chr11:121451948-121673151	38.98	19.2288	-1.01946	0.00585	0.0372264	yes
Bptf	chr11:107033080-107131922	25.3781	12.5082	-1.02071	0.00805	0.0460835	yes
Cluh	chr11:74649494-74670847	36.6793	18.0656	-1.02173	0.0061	0.0383807	yes
Fam179b	chr12:64965741-65022573	18.1132	8.91956	-1.02199	0.0064	0.0395897	yes
Tug1	chr11:3639784-3648814	38.1358	18.7783	-1.02208	0.0052	0.0343364	yes
Stam	chr2:14074111-14148330	39.9377	19.6406	-1.02391	0.0071	0.0424446	yes
Cul5	chr9:53614581-53667507	27.6756	13.6087	-1.02409	0.0054	0.0353392	yes
Cep192	chr18:67800106-67885170	13.8938	6.83022	-1.02444	0.00655	0.0402421	yes
Ell2	chr13:75707483-75772358	24.8206	12.1997	-1.02469	0.00665	0.0406016	yes
G2e3	chr12:51348229-51376986	12.2212	6.00462	-1.02525	0.00715	0.0426134	yes
Nkap	chrX:37126762-37168842	16.6288	8.16858	-1.02553	0.00755	0.0442564	yes
Tmed5	chr5:108121646-108132591	75.7886	37.1763	-1.0276	0.00675	0.0409567	yes
Fndc3b	chr3:27416161-27710439	49.042	24.0507	-1.02794	0.00575	0.0367493	yes
Psmc6	chr14:45329823-45349071	197.586	96.8694	-1.02837	0.00625	0.0389903	yes
Sacm1l	chr9:123529881-123592598	73.9821	36.2681	-1.02848	0.00555	0.0359999	yes
Dhx36	chr3:62468641-62506988	65.2718	31.9974	-1.02851	0.00555	0.0359999	yes
Fyttd1	chr16:32877783-32908963	33.5653	16.452	-1.02871	0.00585	0.0372264	yes
Arhgap18	chr10:26772511-26918648	22.6141	11.0804	-1.02921	0.00795	0.0456892	yes
Heatr5a	chr12:51875872-51971321	14.7776	7.2301	-1.03133	0.00715	0.0426134	yes
Braf	chr6:39603236-39725463	6.92817	3.38849	-1.03183	0.007	0.0420824	yes
U2surp	chr9:95456893-95511996	42.0081	20.5374	-1.03242	0.00525	0.0345694	yes
Dzip3	chr16:48924227-48994112	10.9277	5.33727	-1.03381	0.0066	0.0403803	yes
Zfp386	chr12:116047723-116063207	12.747	6.22456	-1.03412	0.00615	0.0385713	yes
Rab3gap1	chr1:127868772-127943876	31.8437	15.5479	-1.03429	0.00585	0.0372264	yes
Spopl	chr2:23510053-23572104	18.0285	8.80053	-1.03462	0.00805	0.0460835	yes
Suz12	chr11:79993105-80034123	70.2225	34.264	-1.03524	0.005	0.0335054	yes
Spcs3	chr8:54520432-54529998	118.256	57.689	-1.03555	0.00725	0.0429913	yes
Hspa13	chr16:75755190-75766818	22.9556	11.198	-1.03561	0.00585	0.0372264	yes
Chd8	chr14:52198150-52237572	17.0365	8.30938	-1.03582	0.0044	0.030602	yes
Prps2	chrX:167346332-167382699	43.493	21.1935	-1.03716	0.00615	0.0385713	yes
Trps1	chr15:50654758-50890041	5.00861	2.44006	-1.03749	0.00775	0.0449133	yes
Specc1l	chr10:75212072-75312400	17.6658	8.60261	-1.03811	0.005	0.0335054	yes
Usp48	chr4:137594188-137658537	14.4715	7.04679	-1.03818	0.0056	0.0361844	yes
Pik3cb	chr9:99038401-99140211	45.0053	21.9048	-1.03885	0.0053	0.03484	yes
Mvp	chr7:126986859-127014594	60.8948	29.6366	-1.03894	0.0055	0.0357942	yes
Ddx24	chr12:103407975-103425867	64.5327	31.4051	-1.03903	0.0053	0.03484	yes
Gbe1	chr16:70313948-70569720	55.2049	26.8548	-1.03962	0.00515	0.0341405	yes
Tanc1	chr2:59612041-59846213	26.5694	12.9244	-1.03967	0.00505	0.0337059	yes
Uggt2	chr14:118984984-119099434	11.4762	5.58223	-1.03973	0.00755	0.0442564	yes
Mylk	chr16:34784949-35002434	7.50966	3.65232	-1.03993	0.0062	0.0387814	yes
Ube4a	chr9:44923126-44965600	20.2953	9.86977	-1.04005	0.00735	0.0433872	yes
Ralgapb	chr2:158409852-158499253	24.1134	11.7222	-1.04059	0.00445	0.0308949	yes
Osbp	chr19:11965843-11994114	31.3217	15.2227	-1.04094	0.0071	0.0424446	yes
Pnpla7	chr2:24976032-25054072	6.74522	3.27519	-1.04229	0.0082	0.0466467	yes
Pld1	chr3:27938679-28133362	6.59784	3.20306	-1.04254	0.00885	0.0492239	yes
Kmt2c	chr5:25271793-25498783	4.8322	2.34209	-1.04488	0.00505	0.0337059	yes
Galnt7	chr8:57523824-57663430	19.1439	9.27708	-1.04514	0.00565	0.0363874	yes
Tcea1	chr1:4857693-4897909	239.366	115.921	-1.04607	0.0066	0.0403803	yes
Mdm4	chr1:132986104-133030587	25.5131	12.3533	-1.04635	0.00405	0.0289564	yes
Efcab14	chr4:115738072-115777327	18.5234	8.96454	-1.04705	0.00715	0.0426134	yes
Adi1	chr12:28675206-28682174	144.913	70.11	-1.04749	0.0037	0.027233	yes
Ermp1	chr19:29609882-29648420	50.9985	24.6607	-1.04824	0.00505	0.0337059	yes
Slc4a4	chr5:88887259-89239656	8.3744	4.04875	-1.04851	0.00565	0.0363874	yes
Tdrd7	chr4:45965334-46034765	35.9286	17.3647	-1.04897	0.004	0.0287037	yes
Skp1a	chr11:52231994-52246858	160.529	77.5586	-1.04948	0.0041	0.0291542	yes
Aggf1	chr13:95350682-95375357	21.4841	10.3688	-1.05102	0.0068	0.0411963	yes
Ide	chr19:37268740-37330613	54.9445	26.5021	-1.05187	0.0052	0.0343364	yes
Chuk	chr19:44073333-44107477	38.3999	18.5064	-1.05308	0.00385	0.027969	yes
Mfsd6	chr1:52656304-52727318	12.0231	5.79278	-1.05348	0.00545	0.0355871	yes
Pttg1ip	chr10:77581766-77598732	204.714	98.6078	-1.05384	0.008	0.0459091	yes
Col4a5	chrX:141475418-141689235	48.1375	23.1683	-1.05501	0.00735	0.0433872	yes
Supt6	chr11:78206748-78245703	34.8252	16.7559	-1.05546	0.0042	0.0296143	yes
Taf2	chr15:55015128-55072152	22.4477	10.7918	-1.05663	0.0057	0.036589	yes
B3gnt2	chr11:22834738-22860336	17.1291	8.23306	-1.05695	0.00795	0.0456892	yes
C2cd3	chr7:100372232-100470159	5.52332	2.65424	-1.05724	0.00785	0.0453363	yes
Smad5	chr13:56703009-56742378	21.5439	10.3529	-1.05724	0.0042	0.0296143	yes
Clk4	chr11:51263113-51281770	30.6591	14.7267	-1.05788	0.00445	0.0308949	yes
Gulp1	chr1:44551670-44796836	21.769	10.4545	-1.05815	0.00615	0.0385713	yes
Mtmr1	chrX:71364759-71419196	17.3591	8.33008	-1.05929	0.0062	0.0387814	yes
Zfp932	chr5:109996526-110010411	19.7649	9.48417	-1.05935	0.00645	0.0397942	yes
Wdr41	chr13:94976343-95023316	14.9803	7.18543	-1.05992	0.0067	0.0408009	yes
Fem1b	chr9:62791829-62811648	23.9407	11.4751	-1.06096	0.0052	0.0343364	yes
Cbl	chr9:44149261-44234046	14.2172	6.8123	-1.06142	0.0057	0.036589	yes
Snx14	chr9:88376746-88438951	29.7448	14.2484	-1.06184	0.00555	0.0359999	yes
Fmnl2	chr2:52857867-53134202	20.0202	9.58205	-1.06305	0.00535	0.0350901	yes
Aqr	chr2:114101160-114175339	31.4461	15.0448	-1.06362	0.00425	0.0298236	yes
Slc4a7	chr14:14703024-14799943	9.86104	4.71448	-1.06464	0.00485	0.0329514	yes
Dicer1	chr12:104687741-104751952	13.0411	6.21901	-1.06831	0.00485	0.0329514	yes
Tigd2	chr6:59208869-59212033	16.1344	7.68063	-1.07084	0.00565	0.0363874	yes
Sipa1l1	chr12:82170015-82451784	13.9352	6.63211	-1.0712	0.004	0.0287037	yes
2610002M06Rik	chrX:107782751-107872911	13.529	6.43821	-1.07132	0.00515	0.0341405	yes
Cdc42bpa	chr1:179961088-180196020	29.0583	13.8186	-1.07234	0.0049	0.0331378	yes
Nexn	chr3:152236983-152266320	13.7227	6.52478	-1.07257	0.00725	0.0429913	yes
Kidins220	chr12:24974931-25059697	45.3868	21.5724	-1.07308	0.0046	0.0316742	yes
Trp53inp2	chr2:155381855-155389847	14.5942	6.93112	-1.07423	0.0087	0.0486661	yes
Ggnbp2	chr11:84832360-84871631	69.2671	32.8926	-1.07441	0.0043	0.0301026	yes
Dclk1	chr3:55242525-55539068	58.8316	27.9249	-1.07504	0.00375	0.0274977	yes
Suv420h1	chr19:3767420-3818303	10.2112	4.846	-1.07529	0.0077	0.0448225	yes
Tanc2	chr11:105589985-105929303	7.78478	3.69413	-1.07542	0.00385	0.027969	yes
Ccdc132	chr6:3498392-3603531	22.3791	10.6169	-1.07579	0.00495	0.0333224	yes
Zfp110	chr7:12834809-12850584	34.6387	16.4267	-1.07634	0.004	0.0287037	yes
Chordc1	chr9:18292266-18314000	85.7245	40.6431	-1.0767	0.0041	0.0291542	yes
Dhx33	chr11:70984090-71004432	16.7929	7.9612	-1.07679	0.0052	0.0343364	yes
Qser1	chr2:104754792-104816696	21.4329	10.1369	-1.08022	0.0028	0.0223752	yes
Mphosph10	chr7:64376540-64392236	36.6111	17.3151	-1.08025	0.00425	0.0298236	yes
Dcaf13	chr15:39112873-39146855	71.5437	33.8354	-1.08029	0.00415	0.0294207	yes
Lars	chr18:42202348-42262071	117.898	55.7478	-1.08055	0.00865	0.0485251	yes
Ipo11	chr13:106794438-106936915	31.9757	15.1125	-1.08123	0.0036	0.0266473	yes
Adam10	chr9:70679000-70780229	84.8854	40.1186	-1.08124	0.0056	0.0361844	yes
Sec16a	chr2:26409430-26445216	19.951	9.4267	-1.08164	0.0042	0.0296143	yes
Cep162	chr9:87191962-87255532	7.62644	3.60272	-1.08192	0.0063	0.0391774	yes
Txndc16	chr14:45134447-45219394	10.1965	4.81632	-1.08208	0.00685	0.0414138	yes
Sf3b1	chr1:54985169-55027478	93.3292	44.0273	-1.08393	0.00525	0.0345694	yes
Pls3	chrX:75785653-75875170	92.0408	43.3646	-1.08576	0.00385	0.027969	yes
Usp40	chr1:87945120-88008551	11.2462	5.29382	-1.08705	0.0045	0.0311316	yes
Wapal	chr14:34673927-34747983	30.5072	14.353	-1.0878	0.0032	0.0245048	yes
Fam45a	chr19:60811569-60836229	20.6025	9.69146	-1.08804	0.0064	0.0395897	yes
Wdr59	chr8:111448783-111522107	10.5259	4.95077	-1.08822	0.00485	0.0329514	yes
Wdr35	chr12:8974000-9028847	12.7752	6.00828	-1.08832	0.0047	0.0321929	yes
Fcho2	chr13:98723405-98815449	28.2116	13.2647	-1.0887	0.00375	0.0274977	yes
Usp47	chr7:112023505-112111386	63.8359	30.0114	-1.08886	0.00375	0.0274977	yes
Pigk	chr3:152714099-152789013	24.4847	11.5045	-1.08968	0.00295	0.0231642	yes
Rngtt	chr4:33310310-33502614	16.9755	7.9601	-1.0926	0.0046	0.0316742	yes
Usp53	chr3:122933600-122984447	13.5841	6.35833	-1.0952	0.0048	0.0327252	yes
Specc1	chr11:61956762-62223013	29.9516	14.013	-1.09587	0.00365	0.0269834	yes
Usp8	chr2:126707327-126759314	43.2304	20.2243	-1.09596	0.00195	0.0173011	yes
Pramef8	chr4:143412425-143421087	8.13481	3.80542	-1.09605	0.0071	0.0424446	yes
Srgap3	chr6:112717971-112947266	10.5267	4.92202	-1.09673	0.00405	0.0289564	yes
Spdl1	chr11:34809184-34833641	11.825	5.52886	-1.09678	0.0066	0.0403803	yes
Herc4	chr10:63243796-63317881	26.5094	12.3896	-1.09737	0.00315	0.0242643	yes
Slmap	chr14:26413174-26533740	34.1083	15.9274	-1.09862	0.0033	0.0250421	yes
Smim13	chr13:41249843-41276577	11.4162	5.32581	-1.10001	0.00555	0.0359999	yes
Lactb2	chr1:13625899-13660509	50.498	23.5458	-1.10076	0.00315	0.0242643	yes
Zfyve26	chr12:79232346-79296282	8.60561	4.00737	-1.10262	0.0049	0.0331378	yes
Vprbp	chr9:106821975-106880992	21.6755	10.092	-1.10285	0.00405	0.0289564	yes
Dennd2c	chr3:103127555-103169733	6.54726	3.0459	-1.10402	0.00725	0.0429913	yes
Abr	chr11:76416731-76577739	25.6007	11.9098	-1.10404	0.0023	0.0195217	yes
Ddx50	chr10:62616022-62651198	36.6865	17.067	-1.10404	0.00395	0.0284492	yes
Msantd4	chr9:4383536-4386869	40.9257	19.0228	-1.10527	0.0034	0.0254881	yes
Dcaf6	chr1:165329500-165460463	22.5588	10.484	-1.10549	0.00385	0.027969	yes
Napb	chr2:148694656-148732420	7.84177	3.64391	-1.10569	0.00775	0.0449133	yes
Mcur1	chr13:43538405-43560191	18.7153	8.69403	-1.10612	0.0037	0.027233	yes
Exoc6b	chr6:84618485-85069513	17.4989	8.12265	-1.10724	0.00315	0.0242643	yes
Xbp1	chr11:5520640-5525993	57.8163	26.824	-1.10795	0.00595	0.0376994	yes
Slc39a11	chr11:113244854-113565815	30.995	14.3736	-1.10862	0.0034	0.0254881	yes
Heatr6	chr11:83753636-83783754	9.80747	4.54629	-1.10919	0.00465	0.0319249	yes
Ppil4	chr10:7792893-7822563	22.1448	10.2418	-1.1125	0.00435	0.0303621	yes
Zfp202	chr9:40192315-40213604	5.98642	2.76799	-1.11285	0.00705	0.0422964	yes
Thada	chr17:84190055-84466208	11.0868	5.12578	-1.113	0.00325	0.0247586	yes
Arap2	chr5:62602445-62766177	4.14269	1.91479	-1.11338	0.00815	0.0464072	yes
Ofd1	chrX:166390032-166440704	6.84329	3.16292	-1.11343	0.00685	0.0414138	yes
Strn	chr17:78653963-78736560	16.5175	7.63397	-1.11349	0.00395	0.0284492	yes
Tsc1	chr2:28641232-28691172	11.8306	5.46721	-1.11364	0.0031	0.0240526	yes
Large	chr8:72814598-73352556	32.5802	15.0541	-1.11384	0.00315	0.0242643	yes
Cep170	chr1:176733652-176807124	43.8907	20.2747	-1.11423	0.0019	0.0169471	yes
Purb	chr11:6467598-6476076	45.397	20.9658	-1.11456	0.0033	0.0250421	yes
Armcx3	chrX:134756567-134761456	76.7326	35.4349	-1.11467	0.00185	0.0165893	yes
Xpo4	chr14:57582270-57664956	12.0378	5.5566	-1.11529	0.00405	0.0289564	yes
Exoc2	chr13:30813917-30974047	25.9845	11.9931	-1.11545	0.00295	0.0231642	yes
Mtrr	chr13:68560779-68582169	16.2911	7.51886	-1.1155	0.0034	0.0254881	yes
Spata5	chr3:37420279-37579095	30.2015	13.9383	-1.11557	0.00285	0.0226515	yes
Tmem18	chr12:30584442-30591219	17.3847	8.01792	-1.11652	0.00575	0.0367493	yes
Eps15	chr4:109280274-109387816	52.4684	24.1901	-1.11703	0.0026	0.0212541	yes
Birc2	chr9:7818225-7837057	12.3956	5.71341	-1.11741	0.0043	0.0301026	yes
Cnot1	chr8:95719450-95821728	68.4009	31.4846	-1.11937	0.0036	0.0266473	yes
Ttc39b	chr4:83220300-83324189	16.0724	7.39386	-1.12019	0.0031	0.0240526	yes
Atp11b	chr3:35754137-35856276	39.6849	18.2445	-1.12113	0.0025	0.0206377	yes
Slk	chr19:47580018-47645246	81.3389	37.3726	-1.12197	0.00315	0.0242643	yes
Kitl	chr10:100015823-100100412	175.672	80.6774	-1.12265	0.0043	0.0301026	yes
Rdx	chr9:52002060-52088738	81.7197	37.4741	-1.12479	0.0026	0.0212541	yes
Glod4	chr11:76220394-76243699	21.3052	9.75628	-1.1268	0.00305	0.0237589	yes
Snx10	chr6:51523902-51590670	35.1845	16.0975	-1.1281	0.00285	0.0226515	yes
Armcx1	chrX:134717937-134721912	34.2028	15.6428	-1.12861	0.00245	0.020397	yes
Insig2	chr1:121304352-121332589	41.2002	18.8429	-1.12863	0.0046	0.0316742	yes
Kif13b	chr14:64652530-64806296	4.01495	1.83619	-1.12866	0.00785	0.0453363	yes
Pogk	chr1:166379166-166409828	23.5561	10.7628	-1.13005	0.0069	0.0415876	yes
Mtmr4	chr11:87592216-87616296	27.7042	12.6428	-1.13179	0.00235	0.0198458	yes
Xrcc5	chr1:72307420-72394953	42.4428	19.3623	-1.13227	0.0033	0.0250421	yes
Prmt10	chr8:77549396-77581338	11.3264	5.16482	-1.1329	0.0048	0.0327252	yes
Zfp277	chr12:40315045-40445790	30.5608	13.9326	-1.13322	0.0028	0.0223752	yes
Notch3	chr17:32120892-32166852	3.35635	1.53002	-1.13334	0.0073	0.0432006	yes
Cep70	chr9:99243467-99300403	18.0744	8.23641	-1.13386	0.0039	0.0282102	yes
Sec23a	chr12:58958383-59012017	32.1786	14.6584	-1.13437	0.0025	0.0206377	yes
Zfp397	chr18:23954687-23964670	16.0366	7.30283	-1.13484	0.0021	0.0182731	yes
Phf8	chrX:151520671-151633857	9.48306	4.31834	-1.13488	0.0037	0.027233	yes
Ppp2r3a	chr9:101104988-101251832	11.9869	5.45801	-1.13502	0.00225	0.0191805	yes
Ccdc136	chr6:29398925-29426995	12.4898	5.68281	-1.13607	0.00385	0.027969	yes
Rars2	chr4:34614957-34660167	14.1756	6.43165	-1.14015	0.0067	0.0408009	yes
Firre	chrX:50563119-50635321	13.8738	6.29136	-1.14092	0.00335	0.0252421	yes
Copb1	chr7:114215558-114254680	165.234	74.8884	-1.1417	0.00235	0.0198458	yes
Mios	chr6:8209226-8236273	9.02254	4.0871	-1.14246	0.005	0.0335054	yes
Hdac8	chrX:102284639-102505148	13.7309	6.21774	-1.14297	0.0062	0.0387814	yes
Ifi204	chr1:173747293-173766919	23.1211	10.4696	-1.14301	0.00315	0.0242643	yes
Ankib1	chr5:3689998-3803124	16.2171	7.34251	-1.14317	0.00255	0.0209621	yes
Rab27b	chr18:69979130-70141605	6.81653	3.08587	-1.14336	0.00425	0.0298236	yes
Uhrf1bp1l	chr10:89744990-89819869	35.638	16.1249	-1.14413	0.0022	0.0188226	yes
Papd5	chr8:88199212-88259722	45.579	20.619	-1.1444	0.0017	0.015675	yes
Lrpprc	chr17:84705246-84790786	77.6776	35.1262	-1.14495	0.00235	0.0198458	yes
Uvssa	chr5:33378695-33419754	5.18689	2.34437	-1.14567	0.0037	0.027233	yes
Ap4e1	chr2:127008710-127069814	10.3976	4.6984	-1.14601	0.0039	0.0282102	yes
Clcn4-2	chr7:7282308-7300851	21.399	9.65921	-1.14756	0.0015	0.0142676	yes
Clk1	chr1:58411987-58424088	50.7443	22.9051	-1.14758	0.00275	0.0221262	yes
Rab6b	chr9:103112073-103185270	54.1897	24.4562	-1.14782	0.0028	0.0223752	yes
Abcd3	chr3:121758909-121815215	55.9928	25.2668	-1.148	0.0023	0.0195217	yes
Abcc4	chr14:118482691-118706219	9.67304	4.36437	-1.1482	0.0024	0.0201377	yes
Xpc	chr6:91489306-91515888	5.221	2.35509	-1.14855	0.0077	0.0448225	yes
Ivns1abp	chr1:151344497-151364445	111.375	50.231	-1.14878	0.00215	0.0185434	yes
Pcdh19	chrX:133582860-133688993	17.8365	8.04224	-1.14917	0.00245	0.020397	yes
Yme1l1	chr2:23156504-23199260	69.4355	31.2936	-1.14981	0.0019	0.0169471	yes
Jrkl	chr9:13242789-13245741	14.1079	6.35519	-1.15049	0.00495	0.0333224	yes
Pms1	chr1:53189188-53296996	6.41551	2.88912	-1.15093	0.0088	0.049062	yes
Dhx29	chr13:112927792-112969187	16.2345	7.30655	-1.1518	0.0039	0.0282102	yes
Dars2	chr1:161040612-161070632	9.61719	4.32432	-1.15314	0.00575	0.0367493	yes
Kif2a	chr13:106960584-107022114	58.9262	26.4886	-1.15354	0.0014	0.0136254	yes
Ift80	chr3:68892498-69004570	16.9897	7.63296	-1.15434	0.00335	0.0252421	yes
Ccdc93	chr1:121431066-121506460	28.8778	12.9713	-1.15464	0.00175	0.015973	yes
Phf20l1	chr15:66577571-66645255	14.1654	6.35996	-1.15528	0.0027	0.0218286	yes
Capn7	chr14:31336723-31371983	17.9435	8.04731	-1.15689	0.00295	0.0231642	yes
Crnkl1	chr2:145917481-145934700	22.428	10.0578	-1.15698	0.00305	0.0237589	yes
Ankrd32	chr13:77043087-77135468	11.3006	5.06633	-1.15739	0.0041	0.0291542	yes
Zfp949	chr9:88548019-88571086	5.95211	2.66477	-1.15939	0.00675	0.0409567	yes
Gm38403	chr10:118920380-118927143	13.2292	5.92264	-1.15942	0.0083	0.0470333	yes
Fam114a2	chr11:57482989-57518644	22.4891	10.0625	-1.16024	0.00225	0.0191805	yes
Azin1	chr15:38487429-38519266	139.927	62.561	-1.16134	0.00275	0.0221262	yes
Cln5	chr14:103070215-103077630	20.5627	9.18754	-1.16228	0.00535	0.0350901	yes
D15Ertd621e	chr15:58415467-58457801	59.7653	26.6939	-1.1628	0.00215	0.0185434	yes
Slc9a6	chrX:56609834-56664230	16.7041	7.46047	-1.16286	0.00255	0.0209621	yes
Cwc22	chr2:77895652-77946356	21.7635	9.69229	-1.167	0.00175	0.015973	yes
Mgea5	chr19:45750258-45783291	67.1061	29.8817	-1.16718	0.0022	0.0188226	yes
Rlf	chr4:121145372-121188534	17.3167	7.70536	-1.16823	0.00245	0.020397	yes
Appl1	chr14:26918987-26970551	18.1912	8.09409	-1.1683	0.00135	0.0132044	yes
Irf1	chr11:53770013-53778374	21.113	9.37767	-1.17083	0.0061	0.0383807	yes
Mut	chr17:40934684-40961989	21.132	9.38495	-1.171	0.0024	0.0201377	yes
Adamtsl4	chr3:95676200-95687917	6.11049	2.71313	-1.17133	0.0087	0.0486661	yes
Clcn5	chrX:7158411-7319358	26.9047	11.9349	-1.17267	0.0016	0.0149405	yes
Zfp160	chr17:21008940-21028856	10.0794	4.46435	-1.17489	0.0032	0.0245048	yes
Prkaa1	chr15:5143860-5181899	34.0892	15.0936	-1.17538	0.00215	0.0185434	yes
Cpd	chr11:76777207-76847008	26.9247	11.9051	-1.17735	0.00225	0.0191805	yes
Fgd6	chr10:94036000-94145339	6.59708	2.91182	-1.17991	0.00245	0.020397	yes
Appbp2	chr11:85191309-85235120	39.316	17.3474	-1.1804	0.00245	0.020397	yes
Taf15	chr11:83473107-83506740	111.506	49.0984	-1.18338	0.0018	0.0163027	yes
Tvp23b	chr11:62879489-62895184	40.9484	18.0246	-1.18384	0.0025	0.0206377	yes
Mcm8	chr2:132816140-132844188	13.6386	6.00271	-1.18401	0.0029	0.0229403	yes
Prepl	chr17:85028346-85090274	15.5643	6.84835	-1.18441	0.00265	0.0214983	yes
Phtf2	chr5:20758663-20882124	7.44505	3.27362	-1.1854	0.0032	0.0245048	yes
Zfp74	chr7:29932790-29951893	7.89703	3.47211	-1.1855	0.0045	0.0311316	yes
Bms1	chr6:118383380-118419417	23.8193	10.467	-1.18629	0.0021	0.0182731	yes
Smchd1	chr17:71344492-71475343	35.464	15.5752	-1.1871	0.00155	0.0145896	yes
Arhgap42	chr9:8994952-9260885	9.01822	3.95201	-1.19026	0.0021	0.0182731	yes
Gm20939	chr17:94864917-94878321	13.6947	5.9998	-1.19063	0.0042	0.0296143	yes
Arfgef2	chr2:166805580-166898051	28.9579	12.6853	-1.1908	0.0015	0.0142676	yes
Uso1	chr5:92137937-92202795	80.132	35.0936	-1.19117	0.00205	0.0179712	yes
Tmx3	chr18:90510153-90543267	38.5959	16.9004	-1.19139	0.00185	0.0165893	yes
Ptgs2os2	chr1:150159042-150164948	25.8278	11.3045	-1.19203	0.00345	0.0258135	yes
Magi3	chr3:104013264-104220406	19.9153	8.71446	-1.1924	0.0019	0.0169471	yes
Zfp654	chr16:64780346-64786321	6.70018	2.93119	-1.19272	0.00555	0.0359999	yes
Zfp788	chr7:41633530-41651532	11.7958	5.15927	-1.19304	0.00205	0.0179712	yes
Dpy19l1	chr9:24411778-24503140	62.3461	27.216	-1.19584	0.0041	0.0291542	yes
Abhd2	chr7:79273265-79361601	30.6695	13.3726	-1.19753	0.0015	0.0142676	yes
Adamtsl3	chr7:82335693-82614448	5.78408	2.52139	-1.19787	0.00315	0.0242643	yes
Actr6	chr10:89711972-89732295	19.378	8.44652	-1.19799	0.0051	0.0339048	yes
Tmem87a	chr2:120355308-120504919	29.0092	12.6297	-1.19969	0.0028	0.0223752	yes
Rpe	chr1:66700892-66817595	49.4811	21.5367	-1.20008	0.008	0.0459091	yes
Tab3	chrX:85574021-85634469	15.7478	6.85367	-1.2002	0.00195	0.0173011	yes
Mpdz	chr4:81278498-81442815	27.8278	12.1093	-1.20041	0.00135	0.0132044	yes
Ppig	chr2:69723087-69754059	37.8541	16.4621	-1.2013	0.00105	0.0112642	yes
Ankhd1	chr18:36560602-36658908	27.5938	11.9943	-1.20199	0.00145	0.013996	yes
Dock5	chr14:67751927-67933572	16.5118	7.17464	-1.20252	0.00105	0.0112642	yes
Xpo1	chr11:23256040-23297597	112.313	48.7868	-1.20296	0.00095	0.0105379	yes
Zfp937	chr2:150218098-150244874	6.25067	2.713	-1.20412	0.0025	0.0206377	yes
Ubr3	chr2:69897245-70024010	31.001	13.4487	-1.20485	0.0011	0.0116727	yes
Tnks2	chr19:36834231-36893477	87.2592	37.8373	-1.2055	0.0024	0.0201377	yes
Ckap5	chr2:91546321-91620665	64.6496	28.0134	-1.20652	0.00135	0.0132044	yes
Zik1	chr7:10487223-10495381	5.32182	2.30553	-1.20682	0.0079	0.0454908	yes
Adh7	chr3:138210716-138239663	127.456	55.1808	-1.20776	0.00105	0.0112642	yes
Tnrc6a	chr7:123123884-123195296	23.0428	9.9692	-1.20877	0.00135	0.0132044	yes
Rock1	chr18:10064400-10181792	28.9993	12.5452	-1.20888	0.00155	0.0145896	yes
Esyt2	chr12:116281221-116373098	61.3512	26.5316	-1.20938	0.0015	0.0142676	yes
1110037F02Rik	chr4:11485957-11551143	18.9899	8.20768	-1.21019	0.0017	0.015675	yes
Agps	chr2:75832176-75931350	41.4923	17.9314	-1.21035	0.001	0.0108869	yes
Spty2d1	chr7:46990395-47008414	10.3771	4.48299	-1.21087	0.0018	0.0163027	yes
Ddx10	chr9:53098453-53248112	24.4832	10.5752	-1.21111	0.0014	0.0136254	yes
Kdm3a	chr6:71588969-71632917	12.1165	5.2304	-1.21198	0.0016	0.0149405	yes
Tlr2	chr3:83836271-83841608	28.318	12.2033	-1.21444	0.00485	0.0329514	yes
Smc1a	chrX:152016427-152061973	88.9067	38.3065	-1.2147	0.0018	0.0163027	yes
Acad11	chr9:104063702-104127646	7.93398	3.41802	-1.21488	0.0035	0.0261376	yes
Mphosph9	chr5:124250958-124327972	5.82823	2.51058	-1.21504	0.00255	0.0209621	yes
Tns1	chr1:73910230-74124449	4.20978	1.81306	-1.21532	0.00335	0.0252421	yes
Parp4	chr14:56575618-56659798	9.82687	4.22251	-1.21863	0.0021	0.0182731	yes
Zfp51	chr17:21450373-21465589	14.1786	6.09131	-1.21889	0.003	0.0234783	yes
Zfp958	chr8:4613169-4630231	9.47392	4.06863	-1.21942	0.00675	0.0409567	yes
Lims1	chr10:58323465-58424691	54.6712	23.4634	-1.22037	0.00125	0.0125502	yes
Fam21	chr6:116208032-116262671	41.1906	17.6693	-1.22107	0.00155	0.0145896	yes
Myo18a	chr11:77777234-77865988	14.983	6.42342	-1.22192	0.0013	0.0128761	yes
Tarsl2	chr7:65644897-65692093	26.3543	11.2975	-1.22203	0.00195	0.0173011	yes
Intu	chr3:40540766-40704774	3.16642	1.35671	-1.22274	0.00625	0.0389903	yes
Cul4b	chrX:38531620-38576196	67.7752	29.0279	-1.22332	0.0008	0.00932302	yes
Fpgt	chr3:155084918-155093378	13.5399	5.78917	-1.22579	0.00185	0.0165893	yes
Exd2	chr12:80463094-80498135	12.3465	5.27339	-1.2273	0.00215	0.0185434	yes
Fancd2	chr6:113531681-113596285	7.54475	3.22195	-1.22754	0.00295	0.0231642	yes
Pigh	chr12:79029162-79103939	10.1878	4.35004	-1.22774	0.0079	0.0454908	yes
Tnks	chr8:34829178-34965690	25.7043	10.9691	-1.22856	0.00125	0.0125502	yes
Fktn	chr4:53714181-53763271	11.1802	4.76407	-1.23068	0.0029	0.0229403	yes
Serpinb9b	chr13:33027413-33040558	158.414	67.4768	-1.23123	0.00175	0.015973	yes
Zfp9	chr6:118461949-118479273	9.97949	4.24448	-1.23338	0.0033	0.0250421	yes
Dpp8	chr9:65032457-65082651	31.9172	13.5732	-1.23357	0.0012	0.0122047	yes
Enox2	chrX:49009706-49288242	7.88421	3.35175	-1.23405	0.0032	0.0245048	yes
Abcc1	chr16:14361557-14474878	57.701	24.5201	-1.23463	0.0015	0.0142676	yes
Sgtb	chr13:104109789-104141441	5.58107	2.37152	-1.23473	0.0075	0.0440292	yes
Baz1a	chr12:54892988-54986336	17.6815	7.50358	-1.23659	0.0015	0.0142676	yes
Zfp229	chr17:21733723-21748969	4.1982	1.78092	-1.23715	0.0069	0.0415876	yes
Setd2	chr9:110532596-110618633	19.4896	8.2657	-1.2375	0.0012	0.0122047	yes
Tmem106b	chr6:13069758-13089269	42.9049	18.1956	-1.23755	0.0013	0.0128761	yes
Kdm7a	chr6:39118472-39206773	3.06656	1.29959	-1.23857	0.00295	0.0231642	yes
Slu7	chr11:43433730-43447981	23.0846	9.75952	-1.24205	0.00105	0.0112642	yes
Marf1	chr16:14109165-14159274	16.1996	6.83831	-1.24425	0.00125	0.0125502	yes
Uggt1	chr1:36140027-36244302	32.6299	13.7588	-1.24584	0.0007	0.0084424	yes
Entpd5	chr12:84373875-84409029	11.23	4.72794	-1.24807	0.00125	0.0125502	yes
Trim2	chr3:84160438-84304775	32.8728	13.8035	-1.25186	0.0012	0.0122047	yes
Ubr1	chr2:120850655-120970715	14.3245	6.01435	-1.252	0.00085	0.00976046	yes
Dcp2	chr18:44380499-44424969	7.64329	3.2049	-1.25392	0.0013	0.0128761	yes
Pdcl	chr2:37350073-37359332	32.9188	13.7841	-1.25591	0.00155	0.0145896	yes
Ccdc47	chr11:106199355-106216367	133.254	55.7739	-1.25652	0.00145	0.013996	yes
Mpp7	chr18:7347961-7626863	4.21573	1.76439	-1.25661	0.0049	0.0331378	yes
Lig4	chr8:9970019-9976323	5.81558	2.43337	-1.25697	0.00405	0.0289564	yes
Ppfibp1	chr6:146888493-147032023	51.5942	21.5792	-1.25757	0.0005	0.00659944	yes
Esco1	chr18:10566511-10610352	7.97024	3.33277	-1.2579	0.00245	0.020397	yes
Ireb2	chr9:54863754-54912534	51.3753	21.4775	-1.25825	0.00085	0.00976046	yes
Bmpr2	chr1:59764278-59878081	19.7295	8.24527	-1.25871	0.0006	0.00756245	yes
Zfp955a	chr17:33239506-33255145	15.4867	6.47034	-1.25911	0.00125	0.0125502	yes
Ankrd28	chr14:31700014-31830415	30.2797	12.6437	-1.25993	0.0012	0.0122047	yes
Smcr8	chr11:60777524-60788287	30.2446	12.6225	-1.26068	0.001	0.0108869	yes
Ccser2	chr14:36874935-36968764	24.1505	10.0782	-1.26081	0.0011	0.0116727	yes
Cast	chr13:74693293-74808760	100.45	41.8992	-1.26149	0.00085	0.00976046	yes
Alg11	chr8:22060720-22071627	3.60555	1.50374	-1.26167	0.00655	0.0402421	yes
Shroom4	chrX:6400144-6633717	4.2111	1.75549	-1.26233	0.00385	0.027969	yes
Ncoa4	chr14:32159886-32179855	58.5134	24.3905	-1.26244	0.00095	0.0105379	yes
Ctr9	chr7:111028950-111056377	27.3145	11.3666	-1.26487	0.00075	0.0088813	yes
Aldh1l2	chr10:83487446-83534140	70.9687	29.5188	-1.26555	0.00325	0.0247586	yes
Ahctf1	chr1:179744903-179804015	41.2357	17.1512	-1.26558	0.001	0.0108869	yes
Ttc14	chr3:33800182-33844310	27.6164	11.484	-1.2659	0.001	0.0108869	yes
Tsr1	chr11:74898079-74925798	45.8413	19.0368	-1.26785	0.00605	0.0382093	yes
Zbtb33	chrX:38189792-38252481	21.5457	8.94512	-1.26823	0.00115	0.012008	yes
Sppl2a	chr2:126890394-126933235	36.5579	15.1727	-1.2687	0.0009	0.0101364	yes
Tax1bp1	chr6:52713728-52766779	55.1382	22.8841	-1.26871	0.00055	0.00705333	yes
Fam178a	chr19:44931118-44984550	27.1959	11.2864	-1.2688	0.00055	0.00705333	yes
Abl2	chr1:156558786-156649619	38.9421	16.155	-1.26935	0.0009	0.0101364	yes
Chd2	chr7:73426651-73558395	30.2627	12.5505	-1.2698	0.0007	0.0084424	yes
Golga3	chr5:110176700-110223155	15.3313	6.35767	-1.26991	0.00065	0.00799534	yes
Camsap2	chr1:136268122-136346104	20.4304	8.46229	-1.2716	0.00115	0.012008	yes
Rp2h	chrX:20364480-20405653	25.8362	10.6967	-1.27224	0.00265	0.0214983	yes
Zfp53	chr17:21488987-21510477	13.8257	5.72259	-1.27261	0.00295	0.0231642	yes
Utp20	chr10:88746606-88826814	36.1064	14.9428	-1.2728	0.0012	0.0122047	yes
Myh10	chr11:68691914-68816624	51.8422	21.4458	-1.27343	0.001	0.0108869	yes
Katna1	chr10:7725999-7763150	23.7188	9.80089	-1.27505	0.00155	0.0145896	yes
Itsn2	chr12:4593007-4738383	26.5129	10.9459	-1.27631	0.0012	0.0122047	yes
Impact	chr18:12972251-12992948	94.9214	39.1815	-1.27656	0.00095	0.0105379	yes
2310035C23Rik	chr1:105663860-105755131	15.834	6.53589	-1.27657	0.0008	0.00932302	yes
Wwp1	chr4:19608299-19709004	16.7009	6.8881	-1.27775	0.00075	0.0088813	yes
Brip1	chr11:86058135-86201193	4.59012	1.89288	-1.27795	0.0019	0.0169471	yes
Zfp81	chr17:33333727-33358878	8.41632	3.47022	-1.27816	0.0054	0.0353392	yes
Nap1l1	chr10:111473191-111498150	946.545	390.025	-1.27911	0.00515	0.0341405	yes
Snx29	chr16:11322903-11755473	8.20941	3.38214	-1.27934	0.00595	0.0376994	yes
Creg1	chr1:165763779-165775304	58.1551	23.9564	-1.2795	0.0013	0.0128761	yes
Ltn1	chr16:87376650-87432606	17.8461	7.3488	-1.28003	0.0007	0.0084424	yes
Gapvd1	chr2:34676982-34755232	29.0245	11.9324	-1.28239	0.00055	0.00705333	yes
Phc3	chr3:30899294-30969415	19.555	8.03792	-1.28265	0.00065	0.00799534	yes
Nudt12	chr17:59001400-59013322	8.82547	3.62638	-1.28314	0.0051	0.0339048	yes
Dcaf17	chr2:71055743-71099142	7.30906	2.9998	-1.28482	0.0088	0.049062	yes
Brca2	chr5:150522620-150570146	5.78725	2.37508	-1.2849	0.0003	0.00450652	yes
Diap2	chrX:129749741-130465833	7.05413	2.8945	-1.28516	0.0015	0.0142676	yes
Cebpz	chr17:78916498-78937070	39.0104	16.002	-1.2856	0.00105	0.0112642	yes
Trim56	chr5:137111285-137116207	19.7111	8.08545	-1.28561	0.0012	0.0122047	yes
Tgs1	chr4:3574878-3616623	28.0423	11.4989	-1.2861	0.0007	0.0084424	yes
Fryl	chr5:73020190-73256618	11.2922	4.62476	-1.28788	0.0011	0.0116727	yes
Atat1	chr17:35897597-35910068	8.39593	3.43855	-1.28789	0.00665	0.0406016	yes
Kmt2a	chr9:44803354-44881274	15.9843	6.54167	-1.28892	0.00075	0.0088813	yes
Dnajb9	chr12:44205896-44210068	75.1095	30.7322	-1.28925	0.0022	0.0188226	yes
D5Ertd579e	chr5:36600485-36696021	17.1136	7.00133	-1.28944	0.00135	0.0132044	yes
Ccar1	chr10:62743927-62792368	47.0586	19.2409	-1.29028	0.00075	0.0088813	yes
Sh3bgrl	chrX:109095406-109162467	132.106	53.9283	-1.29258	0.0008	0.00932302	yes
AW549877	chr15:3982034-3995752	49.2512	20.0861	-1.29396	0.0007	0.0084424	yes
Amer1	chrX:95420313-95444840	8.55262	3.48709	-1.29434	0.0015	0.0142676	yes
Mob1a	chr6:83326038-83340949	86.4556	35.2379	-1.29483	0.00055	0.00705333	yes
Pcmtd2	chr2:181837853-181857460	11.4034	4.64479	-1.29578	0.002	0.0176913	yes
Glg1	chr8:111157557-111259202	81.7362	33.2792	-1.29635	0.0005	0.00659944	yes
Inpp5k	chr11:75631019-75648865	6.93253	2.82123	-1.29706	0.004	0.0287037	yes
Ralgapa1	chr12:55602889-55821516	12.976	5.2788	-1.29757	0.00055	0.00705333	yes
Fam214a	chr9:74953052-75032468	6.96546	2.83196	-1.29842	0.0027	0.0218286	yes
Zbtb37	chr1:161017755-161034259	3.48245	1.4158	-1.29849	0.00735	0.0433872	yes
Prkx	chrX:77762029-77795960	29.0059	11.792	-1.29854	0.00095	0.0105379	yes
Morc3	chr16:93832120-93876073	49.2191	19.9825	-1.30049	0.0012	0.0122047	yes
Xpr1	chr1:155275656-155417444	26.0062	10.557	-1.30066	0.0006	0.00756245	yes
Lig3	chr11:82781108-82871210	13.7565	5.57997	-1.30179	0.00555	0.0359999	yes
1810030O07Rik	chrX:12654883-12673546	36.005	14.5943	-1.30279	0.00065	0.00799534	yes
Dennd4c	chr4:86748554-86850602	27.7287	11.2343	-1.30347	0.00035	0.00500786	yes
Fxr1	chr3:34020078-34081354	182.515	73.9106	-1.30416	0.00095	0.0105379	yes
Stag1	chr9:100643622-100958544	32.846	13.2922	-1.30514	0.00075	0.0088813	yes
Asnsd1	chr1:53344616-53352752	53.9324	21.8229	-1.30531	0.00055	0.00705333	yes
Top2b	chr14:16365205-16430787	47.3417	19.1551	-1.30539	0.0007	0.0084424	yes
Ercc6l	chrX:102142819-102157091	16.3928	6.63043	-1.30589	0.0008	0.00932302	yes
Atf6	chr1:170704456-170867771	33.8008	13.6648	-1.30659	0.0005	0.00659944	yes
Rabgap1l	chr1:160219173-160792938	28.0162	11.3226	-1.30705	0.00095	0.0105379	yes
Fam135a	chr1:24010757-24100341	19.6724	7.94499	-1.30806	0.0005	0.00659944	yes
Mir22hg	chr11:75461538-75466690	16.3941	6.61635	-1.30907	0.0022	0.0188226	yes
Zfp719	chr7:43579585-43593710	8.94144	3.6079	-1.30935	0.001	0.0108869	yes
Golga1	chr2:39016155-39065541	13.0021	5.23943	-1.31126	0.0005	0.00659944	yes
Rnf141	chr7:110816534-110844381	47.7884	19.2423	-1.31238	0.00205	0.0179712	yes
Utp6	chr11:79933955-79962387	34.4573	13.8604	-1.31384	0.0005	0.00659944	yes
Nsun4	chr4:116031769-116053876	8.91753	3.58538	-1.31452	0.0026	0.0212541	yes
Aftph	chr11:20685084-20741556	31.9002	12.8235	-1.31478	0.00055	0.00705333	yes
Wars2	chr3:99141089-99220203	8.30958	3.33843	-1.31561	0.00145	0.013996	yes
Sgcd	chr11:46978782-47379302	18.0955	7.26948	-1.31571	0.0038	0.0277776	yes
Dnajb4	chr3:152183870-152210083	75.7576	30.4326	-1.31577	0.00035	0.00500786	yes
Nrd1	chr4:109000804-109202272	101.265	40.6636	-1.31633	0.0072	0.0428679	yes
Ncapg2	chr12:116405401-116463531	27.1604	10.902	-1.31691	0.00045	0.00613955	yes
Tifa	chr3:127789912-127798389	7.53289	3.02332	-1.31707	0.00825	0.0468178	yes
Gmfb	chr14:46808148-46822242	64.5426	25.888	-1.31797	0.0007	0.0084424	yes
Chd6	chr2:160946977-161109086	9.37969	3.75772	-1.31968	0.00035	0.00500786	yes
Vps35	chr8:85260391-85299497	271.918	108.888	-1.32033	0.00065	0.00799534	yes
Zbtb41	chr1:139422382-139453007	18.7483	7.50246	-1.32132	0.0005	0.00659944	yes
Trp53inp1	chr4:11156440-11174377	3.86547	1.54601	-1.3221	0.00565	0.0363874	yes
Zfp869	chr8:69705136-69716902	19.6379	7.85195	-1.32252	0.00065	0.00799534	yes
Ercc5	chr1:44147743-44181260	6.44419	2.57632	-1.32269	0.00155	0.0145896	yes
Peak1	chr9:56201128-56418050	63.4607	25.3702	-1.32273	0.00205	0.0179712	yes
Dars	chr1:128363706-128417416	95.9254	38.3179	-1.32389	0.00015	0.00264572	yes
Jmjd1c	chr10:67127257-67256326	19.036	7.60274	-1.32414	0.0005	0.00659944	yes
Irf9	chr14:55603984-55610030	21.7583	8.67589	-1.32648	0.00095	0.0105379	yes
Cct4	chr11:22990592-23003336	414.497	165.181	-1.32731	0.0012	0.0122047	yes
Ccdc141	chr2:77009905-77170635	3.46273	1.37898	-1.32831	0.0023	0.0195217	yes
Jup	chr11:100368855-100397790	13.2732	5.28469	-1.32862	0.00095	0.0105379	yes
Erlec1	chr11:30929783-30954131	11.5251	4.58801	-1.32883	0.0012	0.0122047	yes
Ube2l6	chr2:84798827-84810003	40.3543	16.0612	-1.32915	0.0012	0.0122047	yes
Prpf8	chr11:75486776-75509447	132.288	52.6121	-1.33021	0.00305	0.0237589	yes
Mbd5	chr2:48949507-49317069	4.8985	1.94554	-1.33217	0.00135	0.0132044	yes
Naa15	chr3:51416015-51475985	106.189	42.1739	-1.33221	0.0009	0.0101364	yes
Cers6	chr2:68861556-69111290	32.668	12.9742	-1.33223	0.00035	0.00500786	yes
Zc3h13	chr14:75004109-75388146	10.532	4.18276	-1.33225	0.00045	0.00613955	yes
Pja2	chr17:64281005-64331883	66.4731	26.3818	-1.33323	0.0004	0.0055673	yes
Uhmk1	chr1:170199255-170215393	22.562	8.93428	-1.33647	0.0013	0.0128761	yes
Npm1	chr11:33152497-33163206	1427.7	565.009	-1.33735	0.0032	0.0245048	yes
Evi5	chr5:107744794-107875107	31.1838	12.3164	-1.34021	0.0005	0.00659944	yes
Cfap69	chr5:5580981-5664232	4.37571	1.72721	-1.34107	0.0064	0.0395897	yes
Vcam1	chr3:116110019-116129688	168.011	66.216	-1.3433	0.00425	0.0298236	yes
Zfp87	chr13:67515781-67526231	7.45323	2.93656	-1.34374	0.00335	0.0252421	yes
Trpm7	chr2:126791557-126876261	65.6698	25.8732	-1.34377	0.0002	0.00333722	yes
Hmmr	chr11:40701387-40733437	28.1254	11.0645	-1.34594	0.0003	0.00450652	yes
Smc3	chr19:53600395-53645831	74.5596	29.3102	-1.34699	0.0003	0.00450652	yes
Fndc3a	chr14:72537952-72710003	21.8868	8.59412	-1.34864	0.00065	0.00799534	yes
Nckap1	chr2:80500511-80581182	206.744	81.0341	-1.35125	0.0005	0.00659944	yes
Mllt4	chr17:13716435-13905794	63.5439	24.8968	-1.35179	0.0006	0.00756245	yes
Nin	chr12:70011434-70112035	10.2985	4.03356	-1.35231	0.0005	0.00659944	yes
Zmym2	chr14:56887794-56962579	5.60535	2.19286	-1.35399	0.00085	0.00976046	yes
Il6st	chr13:112464069-112506860	70.2619	27.4514	-1.35586	0.00035	0.00500786	yes
Met	chr6:17463956-17573980	53.8837	21.0426	-1.35653	0.0005	0.00659944	yes
Zfp882	chr8:71908605-71918851	2.26311	0.883614	-1.35682	0.0075	0.0440292	yes
Gm10336	chr13:12182716-12186488	13.0939	5.10982	-1.35755	0.0009	0.0101364	yes
Nf1	chr11:79339891-79581609	18.2373	7.11489	-1.35798	0.0004	0.0055673	yes
Pnpt1	chr11:29130750-29161828	53.2616	20.7723	-1.35844	0.0002	0.00333722	yes
Sp140	chr1:85576898-85645036	13.0099	5.06155	-1.36196	0.0009	0.0101364	yes
Arhgap26	chr18:38993144-39376285	2.62637	1.02147	-1.36243	0.0027	0.0218286	yes
AW146154	chr7:41478873-41499890	3.25125	1.26373	-1.3633	0.0068	0.0411963	yes
Pnpla8	chr12:44269153-44313435	26.0573	10.1148	-1.36522	0.0004	0.0055673	yes
Synrg	chr11:83964430-84044576	8.63823	3.35306	-1.36526	0.0005	0.00659944	yes
Myo1d	chr11:80482126-80780025	14.5343	5.64099	-1.36544	0.00035	0.00500786	yes
Cep83	chr10:94688789-94790336	33.1273	12.8515	-1.36608	0.00035	0.00500786	yes
Fam172a	chr13:77708689-78166240	24.5584	9.51889	-1.36735	0.00065	0.00799534	yes
Fam63b	chr9:70599013-70657174	15.4036	5.9696	-1.36756	0.00055	0.00705333	yes
Phkb	chr8:85841001-86060642	13.5324	5.2442	-1.36762	0.00065	0.00799534	yes
C1galt1	chr6:7845223-7872042	14.9896	5.80861	-1.36769	0.0012	0.0122047	yes
Casp12	chr9:5345475-5373034	24.374	9.44318	-1.368	0.0005	0.00659944	yes
Kifap3	chr1:163779582-163917107	25.644	9.93356	-1.36824	0.00045	0.00613955	yes
Lrif1	chr3:106684986-106736576	35.3596	13.6936	-1.3686	0.0021	0.0182731	yes
Ccdc55	chr11:77044291-77078437	16.9667	6.56728	-1.36934	0.0003	0.00450652	yes
Nr4a2	chr2:57107225-57124003	9.52037	3.68263	-1.37028	0.0011	0.0116727	yes
Pola1	chrX:93304765-93632155	37.472	14.4878	-1.37098	0.00025	0.00395256	yes
Akr1c12	chr13:4268171-4279399	13.2719	5.12884	-1.37167	0.00395	0.0284492	yes
Golph3l	chr3:95588933-95619247	21.3782	8.25724	-1.37241	0.0003	0.00450652	yes
H2-T22,H2-T9	chr17:36038408-36042702	16.6523	6.42895	-1.37306	0.0012	0.0122047	yes
Cntln	chr4:84884308-85131921	6.82251	2.63339	-1.37338	0.0004	0.0055673	yes
Zfp867	chr11:59461196-59472474	7.63247	2.94571	-1.37354	0.00205	0.0179712	yes
Lnpep	chr17:17527722-17624489	33.2186	12.8146	-1.37421	0.00025	0.00395256	yes
Agrn	chr4:156165289-156197488	33.0279	12.7339	-1.37501	0.0008	0.00932302	yes
Fam171b	chr2:83812727-83881358	37.0861	14.2714	-1.37775	0.0007	0.0084424	yes
Ash1l	chr3:88965811-89079375	29.1641	11.2213	-1.37796	0.00035	0.00500786	yes
Zfp111	chr7:24193214-24208149	4.54142	1.74537	-1.37961	0.0015	0.0142676	yes
Dock9	chr14:121542038-121797734	17.0156	6.53622	-1.38033	0.0003	0.00450652	yes
Shprh	chr10:11149429-11215273	5.35785	2.05698	-1.38112	0.0007	0.0084424	yes
Akap7	chr10:25169089-25299163	4.22322	1.62133	-1.38117	0.00775	0.0449133	yes
Epc2	chr2:49451485-49551609	20.8127	7.98263	-1.38253	0.0001	0.00193845	yes
Map2k6	chr11:110399121-110513637	29.6565	11.3646	-1.3838	0.00055	0.00705333	yes
Adamts9	chr6:92772698-92901441	2.77088	1.06174	-1.38391	0.0044	0.030602	yes
Iqgap1	chr7:80711582-80803331	147.311	56.4315	-1.3843	0.00085	0.00976046	yes
Epb4.1l5	chr1:119545032-119649000	3.64533	1.39534	-1.38544	0.0026	0.0212541	yes
Mybl1	chr1:9667410-9700209	3.86329	1.47873	-1.38547	0.0031	0.0240526	yes
E430025E21Rik	chr15:59331996-59374152	123.748	47.2642	-1.38858	0.00025	0.00395256	yes
Baz2b	chr2:59899362-60125740	6.84597	2.6131	-1.38949	0.0002	0.00333722	yes
Jak2	chr19:29251802-29313080	18.1574	6.92878	-1.38988	0.00025	0.00395256	yes
Klhl24	chr16:20097553-20127744	14.5591	5.54794	-1.3919	0.00105	0.0112642	yes
Kif20b	chr19:34922357-34975731	17.3099	6.59365	-1.39245	0.0004	0.0055673	yes
Kif5b	chr18:6201004-6241524	95.8962	36.5137	-1.39304	0.0003	0.00450652	yes
Cd2ap	chr17:42792950-42876424	56.8813	21.622	-1.39545	0.0002	0.00333722	yes
Frk	chr10:34483399-34611230	6.86832	2.60688	-1.39763	0.0009	0.0101364	yes
Dhtkd1	chr2:5898059-5942792	3.4329	1.30296	-1.39764	0.00575	0.0367493	yes
Cfap97	chr8:46169555-46195590	11.8771	4.50746	-1.39779	0.00075	0.0088813	yes
Luc7l3	chr11:94291138-94321911	59.6315	22.6161	-1.39872	0.0002	0.00333722	yes
Taok1	chr11:77529161-77607815	29.1091	11.0328	-1.39967	0.00015	0.00264572	yes
Ifi35	chr11:101448411-101458701	36.187	13.7126	-1.39997	0.0004	0.0055673	yes
Parp10	chr15:76232994-76243440	13.6036	5.15277	-1.40057	0.00075	0.0088813	yes
Kif3a	chr11:53567368-53604246	13.7351	5.1873	-1.40481	0.00045	0.00613955	yes
Zfp59	chr7:27838583-27856774	5.61994	2.12224	-1.40497	0.0013	0.0128761	yes
Gzf1	chr2:148681119-148692949	33.4538	12.6268	-1.40568	0.0002	0.00333722	yes
AI987944	chr7:41372929-41393379	11.4858	4.33135	-1.40696	0.0005	0.00659944	yes
Tfrc	chr16:32608895-32632794	68.1487	25.6903	-1.40746	0.0002	0.00333722	yes
Upf2	chr2:5951468-6056703	15.3596	5.78999	-1.40751	0.00025	0.00395256	yes
Zfp318	chr17:46383765-46420918	6.7472	2.54329	-1.4076	0.001	0.0108869	yes
Zfp951	chr5:104813167-104860068	3.90163	1.46994	-1.40832	0.00775	0.0449133	yes
Ube3a	chr7:59228749-59306727	38.7071	14.5527	-1.4113	5e-05	0.00109173	yes
Ptgs2	chr1:150100123-150108012	170.917	64.1674	-1.41338	0.00055	0.00705333	yes
Kcna4	chr2:107290588-107298504	2.35157	0.88265	-1.41371	0.0063	0.0391774	yes
Exoc4	chr6:33249149-33972930	18.2725	6.85716	-1.41399	0.00025	0.00395256	yes
Sp100	chr1:85650049-85709448	7.16628	2.68897	-1.41417	0.00385	0.027969	yes
Zfp322a	chr13:23313524-23385799	11.6147	4.35799	-1.41422	0.00015	0.00264572	yes
Ddr2	chr1:169969408-170088944	108.005	40.5196	-1.41441	0.0005	0.00659944	yes
Oxr1	chr15:41447481-41861047	46.8561	17.5691	-1.4152	0.0004	0.0055673	yes
Tyk2	chr9:21104067-21131275	3.43355	1.28618	-1.41661	0.0031	0.0240526	yes
Ubxn2b	chr4:6191104-6219788	4.88409	1.82912	-1.41694	0.00145	0.013996	yes
Tmem245	chr4:56876012-56947429	30.91	11.5723	-1.4174	0.0001	0.00193845	yes
Matr3	chr18:35562157-35592045	111.949	41.8988	-1.41787	0.00035	0.00500786	yes
Slfn3	chr11:83191329-83215154	16.9117	6.32391	-1.41914	0.0009	0.0101364	yes
Zfp106	chr2:120506829-120563831	63.0415	23.5614	-1.41988	0.00035	0.00500786	yes
Ncor1	chr11:62281472-62457332	38.1354	14.2527	-1.4199	0.00625	0.0389903	yes
Zfp329	chr7:12803779-12818860	7.8029	2.915	-1.42051	0.00025	0.00395256	yes
Pbrm1	chr14:31019137-31128930	34.9391	13.0452	-1.42132	5e-05	0.00109173	yes
Vps53	chr11:76046225-76179630	17.9563	6.70082	-1.42208	0.0005	0.00659944	yes
2610507B11Rik	chr11:78261753-78290625	64.1874	23.8925	-1.42573	0.0002	0.00333722	yes
Odf2l	chr3:145118588-145153915	22.5768	8.40376	-1.42573	0.0004	0.0055673	yes
Pign	chr1:105518421-105663676	35.0578	13.0373	-1.42709	0.0002	0.00333722	yes
Eif5a2	chr3:28781310-28798846	26.8452	9.97931	-1.42765	0.0004	0.0055673	yes
Gtpbp4	chr13:8972477-8996012	109.058	40.5366	-1.4278	0.00015	0.00264572	yes
Piga	chrX:164419786-164433915	22.4803	8.35298	-1.4283	0.00095	0.0105379	yes
Plag1	chr4:3901157-3938405	6.98042	2.59328	-1.42854	0.00125	0.0125502	yes
Med13	chr11:86201359-86357525	28.0163	10.4021	-1.42939	0.0044	0.030602	yes
Pfkfb2	chr1:130689042-130729253	10.9321	4.05626	-1.43035	0.00165	0.0153464	yes
Trim23	chr13:104179097-104202048	11.6575	4.32324	-1.43108	0.0005	0.00659944	yes
Rel	chr11:23741728-23770970	4.97989	1.84647	-1.43135	0.00645	0.0397942	yes
Hsp90aa1	chr12:110691035-110696395	987.65	365.957	-1.43232	0.005	0.0335054	yes
Zfp141	chr7:42473385-42505753	7.29085	2.70117	-1.4325	0.00065	0.00799534	yes
Xiap	chrX:42067835-42109664	40.4026	14.9654	-1.43282	0.0001	0.00193845	yes
Trip12	chr1:84721188-84839304	58.3716	21.6076	-1.43373	0.00025	0.00395256	yes
Prpf40a	chr2:53138475-53191187	76.1735	28.1915	-1.43403	5e-05	0.00109173	yes
Fam208a	chr14:27428846-27508460	7.10833	2.62994	-1.43448	0.0065	0.0399976	yes
Zfp420	chr7:29859978-29877302	2.98165	1.10314	-1.43449	0.00725	0.0429913	yes
Zfp943	chr17:21962558-21994366	9.48968	3.50697	-1.43613	0.00115	0.012008	yes
Lox	chr18:52516059-52529867	85.2538	31.5049	-1.43619	0.0003	0.00450652	yes
Ubr5	chr15:37967327-38078854	55.9959	20.6885	-1.43649	0.00045	0.00613955	yes
Aatf	chr11:84422855-84513501	60.1729	22.1787	-1.43994	5e-05	0.00109173	yes
Bcas3	chr11:85353163-85832388	6.02765	2.22158	-1.44001	0.0009	0.0101364	yes
Smarca5	chr8:80699942-80739459	75.4344	27.7959	-1.44035	0.00015	0.00264572	yes
Ezh1	chr11:101191114-101226463	7.58367	2.79304	-1.44106	0.00075	0.0088813	yes
Zfp260	chr7:30095075-30107614	25.2038	9.27747	-1.44184	0.00025	0.00395256	yes
Agl	chr3:116739998-116808166	28.966	10.6529	-1.44311	0.00015	0.00264572	yes
Map1b	chr13:99421463-99516602	50.2232	18.4668	-1.44342	0.0008	0.00932302	yes
Pik3r3	chr4:116221913-116303056	5.98318	2.19744	-1.44509	0.0018	0.0163027	yes
Ift74	chr4:94614490-94693233	20.3158	7.45532	-1.44626	0.0003	0.00450652	yes
Mr1	chr1:155127877-155146780	25.1235	9.21875	-1.44639	0.00035	0.00500786	yes
Top2a	chr11:98992946-99024189	186.001	68.2044	-1.44738	0.0004	0.0055673	yes
Myo1b	chr1:51749757-51915978	32.5305	11.9004	-1.45078	0.00015	0.00264572	yes
Hip1	chr5:135406518-135545122	7.96438	2.91001	-1.45254	0.00035	0.00500786	yes
Mtx3	chr13:92844786-92858230	12.0583	4.40306	-1.45345	0.00015	0.00264572	yes
0610010F05Rik	chr11:23573775-23633631	30.4745	11.1237	-1.45396	5e-05	0.00109173	yes
Cyp39a1	chr17:43667371-43751431	4.83704	1.76544	-1.4541	0.00335	0.0252421	yes
Nat2	chr8:67494874-67502578	8.77783	3.20005	-1.45577	0.0056	0.0361844	yes
Mccc1	chr3:35959305-36053547	20.0593	7.29987	-1.45833	5e-05	0.00109173	yes
Ccdc171	chr4:83525544-83864670	2.9358	1.0673	-1.45979	0.00285	0.0226515	yes
Gemin5	chr11:58120000-58168539	19.7355	7.17256	-1.46023	5e-05	0.00109173	yes
Fyco1	chr9:123789499-123851899	7.30129	2.65066	-1.4618	0.0003	0.00450652	yes
Zfp58	chr13:67490166-67500522	6.36014	2.30489	-1.46436	0.00505	0.0337059	yes
Gfpt1	chr6:87042845-87092207	20.2919	7.35214	-1.46467	0.00015	0.00264572	yes
Slc26a2	chr18:61196853-61211596	6.74769	2.4435	-1.46544	0.0009	0.0101364	yes
Fnbp1l	chr3:122538718-122619714	11.6184	4.20643	-1.46574	0.0003	0.00450652	yes
Zcchc11	chr4:108459425-108559415	13.49	4.88258	-1.46617	0.0001	0.00193845	yes
Arl5b	chr2:15055361-15079191	12.6788	4.5868	-1.46686	0.00055	0.00705333	yes
Cops2	chr2:125830301-125859082	130.961	47.3461	-1.46782	0.0001	0.00193845	yes
Dpy19l4	chr4:11265078-11322131	22.4889	8.12154	-1.46939	0.0003	0.00450652	yes
Etohi1	chr2:178023283-178035859	31.6875	11.4426	-1.4695	0.0022	0.0188226	yes
Zranb3	chr1:127954178-128103047	4.05357	1.4606	-1.47263	0.00175	0.015973	yes
Ints4	chr7:97480955-97541398	24.0775	8.65203	-1.47657	0.00015	0.00264572	yes
Vps41	chr13:18717291-18866811	40.5427	14.5613	-1.4773	5e-05	0.00109173	yes
Zfp407	chr18:84207701-84589504	4.81504	1.72783	-1.47859	0.00035	0.00500786	yes
Zfp354c	chr11:50811084-50827731	1.68242	0.603502	-1.47911	0.0081	0.046257	yes
5730455P16Rik	chr11:80360491-80378015	19.236	6.89815	-1.47953	0.00015	0.00264572	yes
Smurf2	chr11:106820063-106920715	103.748	37.1913	-1.48004	0.0004	0.0055673	yes
Zfp933	chr4:147822985-147848375	4.60011	1.64827	-1.48071	0.0022	0.0188226	yes
Papolg	chr11:23862645-23895270	9.61166	3.44307	-1.48109	0.00065	0.00799534	yes
Clcn3	chr8:60910388-60983311	53.1191	19.0261	-1.48125	0.00015	0.00264572	yes
Uba6	chr5:86110729-86172743	32.922	11.7759	-1.48321	0.00015	0.00264572	yes
Alkbh5	chr11:60537682-60558512	36.3116	12.9881	-1.48324	0.00015	0.00264572	yes
Zmym6	chr4:127077382-127124374	19.9001	7.11733	-1.48337	5e-05	0.00109173	yes
Ddx52	chr11:83942089-83963086	24.7082	8.83017	-1.48448	0.0001	0.00193845	yes
Zfp445	chr9:122848909-122866006	35.9017	12.8253	-1.48505	5e-05	0.00109173	yes
Clasp2	chr9:113741472-113919697	15.9283	5.68302	-1.48686	5e-05	0.00109173	yes
Ralgapa2	chr2:146241298-146512004	5.61442	2.00315	-1.48687	0.00015	0.00264572	yes
Tln2	chr9:67217084-67559703	3.62394	1.2927	-1.48717	0.00035	0.00500786	yes
Hcn1	chr13:117602319-117981028	15.3878	5.4876	-1.48755	0.0003	0.00450652	yes
Usp24	chr4:106316212-106441327	35.5532	12.6762	-1.48785	5e-05	0.00109173	yes
Copg2	chr6:30733505-30896794	23.2536	8.28935	-1.48812	0.0002	0.00333722	yes
Fam65b	chr13:24582188-24733806	2.22482	0.793009	-1.48828	0.0031	0.0240526	yes
Golga4	chr9:118506317-118582519	28.452	10.1394	-1.48855	5e-05	0.00109173	yes
Pla2g4a	chr1:149829618-149961290	119.542	42.5999	-1.4886	5e-05	0.00109173	yes
Wdr81	chr11:75440942-75454717	13.2919	4.72945	-1.4908	0.0001	0.00193845	yes
Fbxo30	chr10:11281329-11297969	14.9827	5.31786	-1.49438	0.00015	0.00264572	yes
Flrt2	chr12:95692225-95785213	15.2633	5.41449	-1.49517	0.0002	0.00333722	yes
Fastkd2	chr1:63730624-63753385	13.5074	4.79134	-1.49525	0.0005	0.00659944	yes
Kdm5b	chr1:134560177-134632878	11.4165	4.04523	-1.49682	0.0002	0.00333722	yes
Smc4	chr3:69004971-69034623	181.7	64.3568	-1.49739	0.00025	0.00395256	yes
Arhgap6	chrX:168795098-169304440	4.01415	1.42126	-1.49792	0.0025	0.0206377	yes
Zkscan8	chr13:21513220-21531114	10.9703	3.88231	-1.49861	5e-05	0.00109173	yes
Nbr1	chr11:101552106-101581951	66.3846	23.4915	-1.49871	0.0001	0.00193845	yes
Rnf20	chr4:49632059-49656886	35.994	12.7358	-1.49887	0.00015	0.00264572	yes
Zfp418	chr7:7171352-7183560	2.29319	0.811284	-1.49908	0.00665	0.0406016	yes
Zyg11b	chr4:108227754-108301090	25.9312	9.16732	-1.50011	5e-05	0.00109173	yes
Gda	chr19:21391306-21472661	8.84441	3.12321	-1.50174	0.0001	0.00193845	yes
Zfp955b	chr17:33289543-33304689	13.4939	4.76189	-1.5027	0.0002	0.00333722	yes
Zfc3h1	chr10:115384958-115432771	22.8368	8.05514	-1.50338	5e-05	0.00109173	yes
Cfap36	chr11:29221535-29247272	41.7042	14.7074	-1.50365	0.00015	0.00264572	yes
Zdhhc20	chr14:57832701-57890262	50.5251	17.8177	-1.50369	5e-05	0.00109173	yes
Zfp65	chr13:67705305-67729173	11.9147	4.19654	-1.50546	0.0002	0.00333722	yes
N4bp2	chr5:65763520-65826784	1.93585	0.680969	-1.5073	0.00355	0.0263769	yes
Rif1	chr2:52072836-52122381	20.9108	7.34981	-1.50847	5e-05	0.00109173	yes
Ranbp6	chr19:29808107-29812974	9.32524	3.27648	-1.50899	0.00035	0.00500786	yes
Ssh2	chr11:77216424-77460219	6.65471	2.33632	-1.51014	0.00015	0.00264572	yes
Hps3	chr3:19957053-20035310	26.1865	9.18846	-1.51093	0.00035	0.00500786	yes
Zfp120	chr2:150114406-150136678	10.4248	3.65561	-1.51184	0.0004	0.0055673	yes
Rsf1	chr7:97579895-97692782	9.89712	3.46813	-1.51285	5e-05	0.00109173	yes
Fam134b	chr15:25843297-25973696	28.8	10.0787	-1.51476	0.0002	0.00333722	yes
Zfhx4	chr3:5177823-5415855	15.9897	5.59348	-1.51533	0.0002	0.00333722	yes
Aspm	chr1:139454772-139494088	19.4343	6.79121	-1.51687	5e-05	0.00109173	yes
Oas1a	chr5:120896256-120907525	13.1837	4.60526	-1.5174	0.0004	0.0055673	yes
Zhx2	chr15:57694666-57839832	3.52643	1.23123	-1.5181	0.0026	0.0212541	yes
Ankfy1	chr11:72690001-72772146	29.3869	10.2485	-1.51976	0.0002	0.00333722	yes
Gm13154	chr4:147553276-147585201	6.22962	2.16869	-1.52232	0.00215	0.0185434	yes
Casp8ap2	chr4:32615472-32653265	9.69591	3.37154	-1.52397	0.0002	0.00333722	yes
Mfap1a	chr2:121492680-121506656	10.675	3.71114	-1.5243	0.00035	0.00500786	yes
Zfp952	chr17:32993138-33005457	3.51505	1.22192	-1.52439	0.0043	0.0301026	yes
Acadsb	chr7:131410600-131446211	33.9641	11.8033	-1.52482	5e-05	0.00109173	yes
Rpgr	chrX:10158215-10216795	2.97741	1.03315	-1.527	0.005	0.0335054	yes
Alkbh8	chr9:3335230-3385846	5.13809	1.77898	-1.53018	0.0036	0.0266473	yes
Ttc3	chr16:94358762-94469221	22.7685	7.88264	-1.53029	0.0001	0.00193845	yes
Klhl11	chr11:100462611-100472782	19.7997	6.8528	-1.53071	0.00015	0.00264572	yes
Cdkl2	chr5:92006073-92043042	13.1391	4.54494	-1.53153	0.0003	0.00450652	yes
Zhx1	chr15:58047002-58076508	12.1814	4.20817	-1.53342	5e-05	0.00109173	yes
Cgnl1	chr9:71626506-71771602	29.091	10.0426	-1.53444	5e-05	0.00109173	yes
Suco	chr1:161816111-161876661	17.0094	5.85275	-1.53914	0.0001	0.00193845	yes
Phf20	chr2:156196646-156309953	25.7183	8.84619	-1.53967	5e-05	0.00109173	yes
Parp11	chr6:127453722-127494239	5.36331	1.84443	-1.53995	0.0012	0.0122047	yes
Zfp947	chr17:22144358-22165977	7.44507	2.55775	-1.54141	0.00155	0.0145896	yes
Chm	chrX:113040591-113185515	25.5753	8.77923	-1.54259	5e-05	0.00109173	yes
Manea	chr4:26324505-26346652	30.9587	10.6256	-1.5428	5e-05	0.00109173	yes
Lgalsl	chr11:20823354-20831108	30.9191	10.603	-1.54403	5e-05	0.00109173	yes
Gxylt2	chr6:100704733-100805081	31.3689	10.7457	-1.54558	0.00025	0.00395256	yes
Smc2	chr4:52439220-52488365	47.6561	16.3161	-1.54636	0.00015	0.00264572	yes
Fbxl20	chr11:98082553-98149616	7.23847	2.47397	-1.54886	0.0004	0.0055673	yes
Lrrk2	chr15:91673223-91816124	14.1271	4.82203	-1.55075	0.00015	0.00264572	yes
B230354K17Rik	chr17:45433830-45442544	11.9046	4.05739	-1.55289	0.00025	0.00395256	yes
Tmf1	chr6:97151949-97179124	12.1677	4.14428	-1.55386	0.00015	0.00264572	yes
Ap2b1	chr11:83302696-83405033	68.6164	23.343	-1.55556	5e-05	0.00109173	yes
Zcchc6	chr13:59769965-59823147	25.6054	8.70337	-1.5568	5e-05	0.00109173	yes
Aldh3a2	chr11:61244751-61267186	41.6935	14.1588	-1.55813	5e-05	0.00109173	yes
Ythdc2	chr18:44828664-44889720	12.102	4.10711	-1.55905	0.0001	0.00193845	yes
Slc38a9	chr13:112660765-112738752	2.9763	1.00973	-1.55955	0.00085	0.00976046	yes
Slc30a4	chr2:122681232-122702663	248.221	84.1716	-1.56022	0.0003	0.00450652	yes
Srbd1	chr17:85984664-86145175	14.8643	5.0393	-1.56056	5e-05	0.00109173	yes
Abca1	chr4:53030788-53159895	28.7608	9.74957	-1.56069	0.0013	0.0128761	yes
Skiv2l2	chr13:112800776-112927380	63.5815	21.5496	-1.56095	0.00065	0.00799534	yes
Srp54c	chr12:55230167-55263480	25.1065	8.48463	-1.56514	0.0001	0.00193845	yes
Sspn	chr6:145934146-145965225	6.90535	2.33342	-1.56527	0.0003	0.00450652	yes
Ibtk	chr9:85687359-85749334	35.9106	12.1333	-1.56544	0.00015	0.00264572	yes
Ercc6l2	chr13:63815319-63900301	10.764	3.63447	-1.5664	0.0001	0.00193845	yes
Fkbp14	chr6:54577604-54593128	5.099	1.72154	-1.56652	0.0035	0.0261376	yes
Zfp369	chr13:65278853-65297795	9.62834	3.25018	-1.56677	0.0003	0.00450652	yes
Ift122	chr6:115853527-115926699	4.56259	1.54005	-1.56688	0.0007	0.0084424	yes
Snrnp200	chr2:127208403-127240451	111.587	37.5876	-1.56984	0.00025	0.00395256	yes
Eprs	chr1:185363094-185428355	126.98	42.6641	-1.57351	0.0005	0.00659944	yes
Rpgrip1l	chr8:91217029-91313222	2.57815	0.866174	-1.57361	0.00215	0.0185434	yes
A830080D01Rik	chrX:159532667-159593081	15.5656	5.22729	-1.57423	5e-05	0.00109173	yes
Trim30d	chr7:104470013-104507849	12.0753	4.05337	-1.57486	0.0003	0.00450652	yes
Pot1b	chr17:55652024-55712628	4.71851	1.58356	-1.57516	0.00105	0.0112642	yes
Akap10	chr11:61871306-61930257	15.1446	5.07248	-1.57804	5e-05	0.00109173	yes
Cd109	chr9:78615545-78716260	25.2879	8.44452	-1.58236	0.0001	0.00193845	yes
Map3k2	chr18:32163088-32236751	18.5921	6.20462	-1.58328	5e-05	0.00109173	yes
Cpeb4	chr11:31870939-31935635	29.4636	9.82535	-1.58435	0.0001	0.00193845	yes
Zfp874b	chr13:67471512-67484253	4.27141	1.42417	-1.5846	0.0012	0.0122047	yes
Lcor	chr19:41549638-41559781	2.16335	0.721206	-1.58478	0.00545	0.0355871	yes
Ptchd4	chr17:42315946-42507741	5.03725	1.6792	-1.58486	0.00055	0.00705333	yes
Lmbrd2	chr15:9111981-9197450	18.1712	6.04836	-1.58704	0.0039	0.0282102	yes
Mturn	chr6:54681623-54703855	1.79903	0.598342	-1.58818	0.0044	0.030602	yes
Dnajc13	chr9:104151596-104262930	78.9182	26.2125	-1.5901	0.0001	0.00193845	yes
Pcmtd1	chr1:7088919-7173628	23.3293	7.74391	-1.59101	5e-05	0.00109173	yes
Ubr4	chr4:139380658-139489532	34.6468	11.4764	-1.59405	0.0001	0.00193845	yes
Chic1	chrX:103356475-103396118	6.18892	2.04997	-1.59408	0.00035	0.00500786	yes
Lypla1	chr1:4807892-4846735	71.6992	23.7383	-1.59474	5e-05	0.00109173	yes
6720489N17Rik	chr13:62603014-62624182	4.49881	1.48688	-1.59725	0.00425	0.0298236	yes
Hspa4	chr11:53259813-53300479	162.542	53.6992	-1.59784	0.00015	0.00264572	yes
Trim25	chr11:88999402-89020293	34.6784	11.4458	-1.59922	0.0002	0.00333722	yes
Alg2	chr4:47469832-47474367	35.9037	11.8445	-1.59992	0.0001	0.00193845	yes
Taf1	chrX:101532734-101601789	27.1062	8.93455	-1.60115	5e-05	0.00109173	yes
Card6	chr15:5097438-5108533	1.23037	0.404882	-1.60351	0.0081	0.046257	yes
Gm2381	chr7:42816826-42867234	6.47739	2.12793	-1.60596	0.0003	0.00450652	yes
Ampd3	chr7:110768205-110812408	82.2539	26.9863	-1.60786	5e-05	0.00109173	yes
Arfgef1	chr1:10137506-10232670	35.2544	11.5592	-1.60877	5e-05	0.00109173	yes
B3galt1	chr2:68104671-68122882	6.69372	2.19459	-1.60886	0.0001	0.00193845	yes
Trove2	chr1:143750790-143777051	38.4737	12.5828	-1.61242	0.00015	0.00264572	yes
Cdk5rap3	chr11:96907424-96916514	30.0826	9.83678	-1.61267	0.0001	0.00193845	yes
Erbb2ip	chr13:103818785-103920586	75.1271	24.5374	-1.61435	5e-05	0.00109173	yes
Eif3a	chr19:60761115-60790693	308.952	100.809	-1.61576	0.0003	0.00450652	yes
Zzef1	chr11:72796225-72927120	11.386	3.71161	-1.61714	5e-05	0.00109173	yes
Tnpo1	chr13:98842080-98926384	119.053	38.7907	-1.61783	0.0001	0.00193845	yes
Asb3	chr11:30954397-31102704	10.1111	3.29327	-1.61835	0.00185	0.0165893	yes
Htatsf1	chrX:57053569-57067182	48.3251	15.7398	-1.61836	5e-05	0.00109173	yes
Tpp2	chr1:43934006-44002971	77.1709	25.1233	-1.61903	5e-05	0.00109173	yes
Ufl1	chr4:25248585-25281821	26.6215	8.66244	-1.61975	5e-05	0.00109173	yes
Pnma5	chrX:73033980-73037103	5.15228	1.6714	-1.62415	0.00165	0.0153464	yes
Vcpip1	chr1:9718621-9771256	21.5446	6.95372	-1.63147	0.00015	0.00264572	yes
Lancl3	chrX:9199972-9268085	18.6654	6.01232	-1.63438	5e-05	0.00109173	yes
Dennd4a	chr9:64811010-64919667	20.8246	6.70527	-1.63492	5e-05	0.00109173	yes
Utp14a	chrX:48256933-48285426	40.3142	12.973	-1.63577	5e-05	0.00109173	yes
Matn2	chr15:34306680-34436240	9.78481	3.14867	-1.6358	0.00015	0.00264572	yes
Mnda	chr1:173896340-173913046	15.416	4.95691	-1.63692	0.00035	0.00500786	yes
Magt1	chrX:105968084-106011899	68.0027	21.8461	-1.63821	5e-05	0.00109173	yes
Fgf10	chr13:118714698-118792573	8.28817	2.66243	-1.63831	0.0005	0.00659944	yes
Adgrl2	chr3:148815585-148954635	24.9334	7.99838	-1.6403	5e-05	0.00109173	yes
Pus10	chr11:23646478-23732876	32.0139	10.2634	-1.6412	0.00115	0.012008	yes
Sgip1	chr4:102760134-103011965	2.62982	0.841329	-1.64422	0.00205	0.0179712	yes
Zfp54	chr17:21423226-21435384	5.80329	1.85606	-1.64463	0.00125	0.0125502	yes
Chml	chr1:175662420-175692632	13.5645	4.3367	-1.64516	0.00015	0.00264572	yes
Nbas	chr12:13269126-13583811	11.6387	3.71492	-1.64752	5e-05	0.00109173	yes
Upf3b	chrX:37091833-37110322	28.5579	9.09005	-1.65153	5e-05	0.00109173	yes
Elmod2	chr8:83312631-83332486	7.94443	2.5142	-1.65985	0.00025	0.00395256	yes
Mia3	chr1:183326235-183369565	40.7578	12.829	-1.66767	5e-05	0.00109173	yes
Itpr2	chr6:146108298-146502223	10.1099	3.17965	-1.66883	5e-05	0.00109173	yes
Ugp2	chr11:21239031-21371267	65.293	20.5188	-1.66998	0.00025	0.00395256	yes
Dennd1b	chr1:138963708-139176042	10.3308	3.24368	-1.67125	5e-05	0.00109173	yes
Nbea	chr3:55625197-56183701	13.5422	4.24994	-1.67195	5e-05	0.00109173	yes
Slc7a11	chr3:50364935-50443613	28.3741	8.90179	-1.67241	5e-05	0.00109173	yes
Sptbn1	chr11:30099394-30219772	141.793	44.4835	-1.67245	0.0003	0.00450652	yes
Fam120c	chrX:151344222-151474134	11.4837	3.5898	-1.67761	5e-05	0.00109173	yes
Huwe1	chrX:151803281-151935417	78.2019	24.4188	-1.67921	0.00025	0.00395256	yes
Usp9x	chrX:13071497-13173327	101.921	31.8091	-1.67994	0.0002	0.00333722	yes
Zscan26	chr13:21442174-21453727	23.8659	7.43937	-1.6817	5e-05	0.00109173	yes
Ttc37	chr13:76098733-76187983	33.3744	10.3977	-1.68248	5e-05	0.00109173	yes
Jade3	chrX:20425687-20519939	16.58	5.16415	-1.68284	5e-05	0.00109173	yes
Ift140	chr17:25016085-25099497	5.50627	1.71309	-1.68447	5e-05	0.00109173	yes
Slc28a2	chr2:122426476-122461130	2.28897	0.711532	-1.6857	0.00235	0.0198458	yes
Rtp4	chr16:23609918-23614222	11.9293	3.69506	-1.69084	0.00115	0.012008	yes
Prpf4b	chr13:34875493-34902878	44.3388	13.7276	-1.69149	5e-05	0.00109173	yes
Esf1	chr2:140119880-140170558	43.0764	13.3365	-1.69151	5e-05	0.00109173	yes
Hmgn5	chrX:109004536-109013380	23.1815	7.16629	-1.69368	5e-05	0.00109173	yes
Bst2	chr8:71534261-71537437	109.952	33.9454	-1.69558	5e-05	0.00109173	yes
Ddx3x	chrX:13281021-13293983	242.396	74.7583	-1.69706	5e-05	0.00109173	yes
Brwd3	chrX:108742207-108834355	3.74638	1.15261	-1.70059	0.00035	0.00500786	yes
Tlr4	chr4:66827810-66842796	31.0796	9.55658	-1.7014	5e-05	0.00109173	yes
Erc2	chr14:27622441-28478537	1.80882	0.555809	-1.70239	0.0019	0.0169471	yes
Gstt3	chr10:75774121-75781414	12.5124	3.84381	-1.70275	0.00045	0.00613955	yes
A630089N07Rik	chr16:98062511-98082439	2.5127	0.771579	-1.70336	0.0042	0.0296143	yes
Utrn	chr10:12382187-12861735	25.6705	7.8821	-1.70346	5e-05	0.00109173	yes
Slc39a10	chr1:46807543-46853509	20.52	6.29811	-1.70404	5e-05	0.00109173	yes
Flna	chrX:74223460-74246534	333.737	102.332	-1.70546	0.00215	0.0185434	yes
Zfp780b	chr7:27959799-27979157	3.35333	1.02779	-1.70605	0.00095	0.0105379	yes
Gm14322	chr2:177759287-177773275	26.4146	8.09353	-1.70649	5e-05	0.00109173	yes
Fzd3	chr14:65192440-65262463	3.12211	0.956539	-1.70663	0.00015	0.00264572	yes
Gm14139	chr2:150181754-150193279	25.9306	7.92963	-1.70933	5e-05	0.00109173	yes
Golgb1	chr16:36880518-36933085	14.6112	4.46458	-1.71048	5e-05	0.00109173	yes
Zfp558	chr9:18454053-18473559	1.39872	0.427113	-1.71142	0.00775	0.0449133	yes
Acbd5	chr2:23068200-23114512	32.814	10.0189	-1.71159	5e-05	0.00109173	yes
Snx13	chr12:35047188-35147477	19.7918	6.03901	-1.71252	5e-05	0.00109173	yes
Pik3r5	chr11:68432124-68497846	0.967061	0.295002	-1.71288	0.0077	0.0448225	yes
Exoc6	chr19:37550417-37683249	12.767	3.8888	-1.71502	0.0001	0.00193845	yes
Sptan1	chr2:29965559-30031450	98.8711	30.0939	-1.71608	5e-05	0.00109173	yes
Pcm1	chr8:41239758-41334087	39.0973	11.8946	-1.71676	5e-05	0.00109173	yes
Gm15127	chrX:149784478-149984982	2.81324	0.855665	-1.71711	0.00445	0.0308949	yes
Serpinb9	chr13:33004540-33017955	23.8484	7.24788	-1.71826	5e-05	0.00109173	yes
Lpin3	chr2:160880669-160906000	9.27863	2.81619	-1.72017	0.00015	0.00264572	yes
Birc6	chr17:74528294-74703356	31.1934	9.46548	-1.72049	5e-05	0.00109173	yes
Mtif2	chr11:29526396-29545447	20.9087	6.33254	-1.72325	5e-05	0.00109173	yes
Atp11c	chrX:60223289-60403981	19.8033	5.98367	-1.72664	0.0001	0.00193845	yes
Pank3	chr11:35769494-35791285	42.5981	12.8418	-1.72994	5e-05	0.00109173	yes
Ccng1	chr11:40748551-40755286	64.3553	19.3764	-1.73176	5e-05	0.00109173	yes
Zfp930	chr8:69209045-69230539	21.5851	6.49405	-1.73284	5e-05	0.00109173	yes
Zfp119a	chr17:55864891-55878953	4.71854	1.41872	-1.73375	0.00205	0.0179712	yes
Zfp40	chr17:23173868-23193228	2.44426	0.733899	-1.73574	0.00175	0.015973	yes
1700049G17Rik	chr7:27907391-27929430	1.85988	0.558373	-1.73591	0.00335	0.0252421	yes
Hectd1	chr12:51743721-51829536	67.5702	20.2513	-1.73837	5e-05	0.00109173	yes
2010315B03Rik	chr9:124291803-124312694	14.0411	4.20632	-1.73902	5e-05	0.00109173	yes
Ppip5k2	chr1:97706042-97770092	28.0689	8.4045	-1.73974	5e-05	0.00109173	yes
Pdpr	chr8:111094744-111145498	10.8199	3.23745	-1.74076	0.00025	0.00395256	yes
Acaca	chr11:84195437-84401651	30.4237	9.08173	-1.74415	5e-05	0.00109173	yes
Mtr	chr13:12186539-12258113	21.2113	6.3283	-1.74494	5e-05	0.00109173	yes
Isg15	chr4:156199423-156200818	66.2627	19.7566	-1.74586	0.0003	0.00450652	yes
Agtpbp1	chr13:59449534-59557347	20.3073	6.05116	-1.74671	5e-05	0.00109173	yes
Pkia	chr3:7366603-7445365	26.113	7.77347	-1.74814	5e-05	0.00109173	yes
Cdk5rap2	chr4:70223023-70410367	21.1227	6.28568	-1.74865	5e-05	0.00109173	yes
Ttbk2	chr2:120732816-120850584	5.4604	1.62471	-1.74882	5e-05	0.00109173	yes
Zfp715	chr7:43296522-43313261	10.6876	3.17906	-1.74927	5e-05	0.00109173	yes
Tgm2	chr2:158116404-158146392	50.1285	14.9088	-1.74946	5e-05	0.00109173	yes
Hmox1	chr8:75093617-75100593	319.869	95.0986	-1.74998	5e-05	0.00109173	yes
Spag9	chr11:93996090-94126082	93.5127	27.7993	-1.75012	5e-05	0.00109173	yes
Rtn1	chr12:72211748-72409054	2.86585	0.846502	-1.75938	0.00745	0.0438453	yes
Tmem260	chr14:48446351-48515159	2.53265	0.747975	-1.75959	0.0012	0.0122047	yes
Abcb7	chrX:104280564-104413846	27.1371	8.00634	-1.76105	5e-05	0.00109173	yes
Zfp638	chr6:83914352-83986871	15.9794	4.71247	-1.76166	5e-05	0.00109173	yes
Etnk1	chr6:143167229-143208547	29.862	8.79384	-1.76374	5e-05	0.00109173	yes
Mbtd1	chr11:93886218-93946984	11.9803	3.52453	-1.76516	5e-05	0.00109173	yes
Ahr	chr12:35497978-35534989	26.8673	7.89303	-1.7672	5e-05	0.00109173	yes
Mpp5	chr12:78748946-78840713	18.8318	5.5192	-1.77064	5e-05	0.00109173	yes
Zfp748	chr13:67538640-67553152	4.83412	1.41631	-1.77111	0.00055	0.00705333	yes
Tcaf2	chr6:42623042-42645041	2.12105	0.620885	-1.77238	0.0022	0.0188226	yes
Mum1l1	chrX:139210043-139238335	18.1476	5.31111	-1.7727	5e-05	0.00109173	yes
Gm17644	chr1:12667562-12673090	3.87794	1.13464	-1.77305	0.0012	0.0122047	yes
Polr3b	chr10:84622436-84727178	21.2252	6.20454	-1.77438	5e-05	0.00109173	yes
Vps13d	chr4:144972621-145195005	5.32258	1.5559	-1.77438	5e-05	0.00109173	yes
Hyou1	chr9:44379489-44392369	188.601	55.0506	-1.77651	0.0036	0.0266473	yes
Zfp626	chr7:27807195-27822916	5.51285	1.60579	-1.77952	0.0001	0.00193845	yes
Osbpl8	chr10:111164801-111297247	44.1002	12.8334	-1.78088	5e-05	0.00109173	yes
Gm3604	chr13:62367715-62383174	3.80736	1.10696	-1.78219	0.00135	0.0132044	yes
Cwf19l2	chr9:3404084-3479236	5.84045	1.69719	-1.78293	0.00035	0.00500786	yes
Zfp873	chr10:82048126-82061586	8.26246	2.40024	-1.78339	0.00055	0.00705333	yes
Zfp825	chr13:74480056-74493950	14.8619	4.31221	-1.78512	0.0006	0.00756245	yes
Zfp874a	chr13:67440430-67451624	3.30003	0.955639	-1.78794	0.00175	0.015973	yes
Mki67	chr7:135689787-135716379	70.0017	20.2626	-1.78857	5e-05	0.00109173	yes
Zfp759	chr13:67128227-67141787	2.6323	0.760861	-1.79062	0.002	0.0176913	yes
Srp54a	chr12:55080495-55115367	8.68931	2.5116	-1.79064	0.0001	0.00193845	yes
Edem3	chr1:151755373-151822328	16.7621	4.84074	-1.79191	5e-05	0.00109173	yes
Zfyve16	chr13:92487748-92530810	12.2126	3.52542	-1.7925	5e-05	0.00109173	yes
Etl4	chr2:20289912-20810535	1.22249	0.352054	-1.79596	0.00115	0.012008	yes
Erap1	chr13:74639871-74691875	13.9245	3.99625	-1.80091	5e-05	0.00109173	yes
Usp32	chr11:84984487-85139955	42.2182	12.1142	-1.80117	5e-05	0.00109173	yes
Herc2	chr7:56050154-56231798	18.6823	5.3536	-1.80309	5e-05	0.00109173	yes
Apc	chr18:34207774-34322190	17.3662	4.97354	-1.80394	5e-05	0.00109173	yes
Zfp946	chr17:22424267-22456689	11.9674	3.42721	-1.804	5e-05	0.00109173	yes
Mycbp2	chr14:103113410-103346800	13.061	3.73906	-1.80451	5e-05	0.00109173	yes
Alms1	chr6:85587530-85702751	3.61854	1.03437	-1.80666	5e-05	0.00109173	yes
Abca8b	chr11:109933405-109995816	9.61894	2.74943	-1.80674	5e-05	0.00109173	yes
Camk4	chr18:32939040-33195767	0.585502	0.167045	-1.80943	0.00275	0.0221262	yes
Hook3	chr8:26021420-26119224	16.2457	4.6282	-1.81154	5e-05	0.00109173	yes
Creld2	chr15:88819645-88826681	100.868	28.7344	-1.81162	0.0003	0.00450652	yes
Stat2	chr10:128270575-128292849	24.2382	6.90271	-1.81205	0.0001	0.00193845	yes
AI314180	chr4:58800030-58912725	82.5275	23.4592	-1.81472	5e-05	0.00109173	yes
Xdh	chr17:73883894-73950196	170.988	48.5988	-1.8149	5e-05	0.00109173	yes
Dmxl1	chr18:49832996-49965473	11.6922	3.32256	-1.81518	5e-05	0.00109173	yes
Enpp5	chr17:44078845-44086561	17.7857	5.05332	-1.81542	5e-05	0.00109173	yes
Plxna2	chr1:194619828-194816868	21.5691	6.12172	-1.81696	0.00015	0.00264572	yes
Nol8	chr13:49653077-49679016	24.2708	6.88831	-1.817	5e-05	0.00109173	yes
Rictor	chr15:6708380-6800400	13.4961	3.82957	-1.81729	5e-05	0.00109173	yes
Stxbp4	chr11:90476492-90638108	13.2454	3.7558	-1.8183	5e-05	0.00109173	yes
Dapp1	chr3:137931005-137981549	3.42995	0.971747	-1.81953	0.0014	0.0136254	yes
Gm14326	chr2:177935992-177957288	32.2517	9.13221	-1.82034	0.0001	0.00193845	yes
Svep1	chr4:58042795-58206596	5.47829	1.55117	-1.82037	5e-05	0.00109173	yes
Hspa4l	chr3:40745612-40790365	78.4245	22.2054	-1.82039	5e-05	0.00109173	yes
Gprasp1	chrX:135742691-135803468	12.3132	3.48566	-1.8207	0.0001	0.00193845	yes
Zfp60	chr7:27731408-27751689	11.8626	3.35701	-1.82117	5e-05	0.00109173	yes
Gm4944	chr17:22197264-22225614	16.5496	4.68185	-1.82165	5e-05	0.00109173	yes
Zfp600	chr4:146156826-146198756	3.98783	1.12701	-1.82311	0.0003	0.00450652	yes
Zfp345	chr2:150470990-150485063	9.40115	2.65342	-1.82499	0.0003	0.00450652	yes
Zfp866	chr8:69761323-69774911	7.53423	2.12522	-1.82585	5e-05	0.00109173	yes
Zfp758	chr17:22361452-22377281	8.76162	2.46231	-1.83119	0.00035	0.00500786	yes
Rapgef6	chr11:54522844-54699286	11.6913	3.27233	-1.83705	5e-05	0.00109173	yes
Nemf	chr12:69311542-69357176	43.6413	12.2028	-1.83848	5e-05	0.00109173	yes
Xrn1	chr9:95954759-96053029	27.8445	7.77549	-1.84038	5e-05	0.00109173	yes
Crebrf	chr17:26715649-26776626	14.7672	4.10857	-1.84569	5e-05	0.00109173	yes
Wrn	chr8:33234372-33385527	6.24451	1.73523	-1.84746	5e-05	0.00109173	yes
Myo5a	chr9:75071205-75223687	8.83997	2.4563	-1.84756	5e-05	0.00109173	yes
Gm3002	chr14:3814912-3830681	4.47426	1.24304	-1.84778	5e-05	0.00109173	yes
Oas1c	chr5:120800198-120812514	2.88222	0.800631	-1.84797	0.00285	0.0226515	yes
Nek1	chr8:60993192-61131346	13.922	3.86534	-1.84869	5e-05	0.00109173	yes
2410089E03Rik	chr15:8169105-8271158	18.233	5.06154	-1.8489	5e-05	0.00109173	yes
Mga	chr2:119897227-119969581	19.3921	5.37792	-1.85035	5e-05	0.00109173	yes
Smek2	chr11:29172906-29220797	42.3525	11.7336	-1.85181	5e-05	0.00109173	yes
Kdm5a	chr6:120324321-120444574	12.7286	3.52173	-1.85372	5e-05	0.00109173	yes
Ccpg1	chr9:72985503-73039699	6.80335	1.88231	-1.85374	0.00345	0.0258135	yes
Pdia4	chr6:47796140-47813512	190.611	52.7263	-1.85403	0.00025	0.00395256	yes
Negr1	chr3:156561793-157316464	7.71084	2.13278	-1.85415	5e-05	0.00109173	yes
Ikbkg	chrX:74393290-74453778	41.3381	11.4061	-1.85767	0.00535	0.0350901	yes
Myo6	chr9:80165033-80311729	14.4676	3.97656	-1.86323	5e-05	0.00109173	yes
Avl9	chr6:56714904-56761911	19.2778	5.29688	-1.86373	5e-05	0.00109173	yes
D3Ertd254e	chr3:36151079-36170341	8.55177	2.34702	-1.86539	5e-05	0.00109173	yes
Gm10033	chr8:69371024-69395544	7.70119	2.10622	-1.87043	0.0006	0.00756245	yes
Prkar2b	chr12:31958478-32061279	184.118	50.3011	-1.87197	5e-05	0.00109173	yes
Mef2c	chr13:83504033-83667079	5.07846	1.38324	-1.87634	5e-05	0.00109173	yes
Zfp931	chr2:178066877-178078425	4.24446	1.15329	-1.87982	0.00215	0.0185434	yes
Fgf7	chr2:125859108-126152004	80.7476	21.9382	-1.87998	0.00075	0.0088813	yes
Smg1	chr7:118131311-118243637	45.7703	12.4032	-1.8837	5e-05	0.00109173	yes
4930470H14Rik	chr17:4044657-4082995	9.15379	2.47408	-1.88748	0.00045	0.00613955	yes
Smc5	chr19:23206440-23273897	34.7617	9.37565	-1.89051	5e-05	0.00109173	yes
Mlh3	chr12:85234465-85270599	3.76174	1.01059	-1.8962	0.00015	0.00264572	yes
Sorbs2	chr8:45507787-45827906	2.20341	0.591695	-1.89681	0.00055	0.00705333	yes
Zfp52	chr17:21528195-21562601	17.4203	4.66549	-1.90067	5e-05	0.00109173	yes
Zfp119b	chr17:55938372-55945259	11.474	3.07235	-1.90096	5e-05	0.00109173	yes
Itgb2	chr10:77530347-77565674	8.86248	2.3719	-1.90167	0.0003	0.00450652	yes
Zfx	chrX:94074630-94123407	47.1697	12.624	-1.90169	5e-05	0.00109173	yes
Gpr155	chr2:73341505-73386480	5.04111	1.34524	-1.90587	5e-05	0.00109173	yes
Mysm1	chr4:94942040-94979100	15.964	4.25516	-1.90753	5e-05	0.00109173	yes
Gm16386	chr17:22776229-22817747	0.927766	0.247129	-1.9085	0.0076	0.0444386	yes
Ifit2	chr19:34550693-34576534	32.657	8.6819	-1.91131	5e-05	0.00109173	yes
Plcb1	chr2:134786163-135475258	7.39939	1.96596	-1.91217	5e-05	0.00109173	yes
Dgkh	chr14:78569608-78725089	4.77041	1.26346	-1.91673	0.00025	0.00395256	yes
Has3	chr8:106870241-106882902	0.986238	0.260819	-1.91889	0.00385	0.027969	yes
Alpk1	chr3:127670309-127780527	5.021	1.32747	-1.9193	0.00025	0.00395256	yes
Macf1	chr4:123349632-123684360	33.2764	8.7904	-1.9205	0.0001	0.00193845	yes
Rock2	chr12:16894977-16988274	115.368	30.4734	-1.92061	5e-05	0.00109173	yes
BC005561	chr5:104508351-104522383	3.7812	0.997196	-1.9229	0.0003	0.00450652	yes
Ankef1	chr2:136532320-136555854	2.88436	0.757752	-1.92845	0.00165	0.0153464	yes
Cog5	chr12:31654868-31950535	19.7676	5.19081	-1.9291	0.005	0.0335054	yes
Cltc	chr11:86583864-87555823	268.531	70.4551	-1.93031	0.0025	0.0206377	yes
Zfp808	chr13:62129889-62173936	5.4017	1.41712	-1.93045	0.00035	0.00500786	yes
Lysmd3	chr13:81657805-81671890	18.6413	4.88308	-1.93264	5e-05	0.00109173	yes
Vav3	chr3:109340682-109685694	7.06448	1.84739	-1.9351	0.0001	0.00193845	yes
Ngef	chr1:87476828-87573870	38.9297	10.1744	-1.93592	5e-05	0.00109173	yes
Scai	chr2:39066214-39190730	14.3741	3.75466	-1.93671	5e-05	0.00109173	yes
Naip6	chr13:100281120-100317688	6.63423	1.73042	-1.93881	5e-05	0.00109173	yes
Cep350	chr1:155844963-155973255	6.92016	1.80275	-1.94061	5e-05	0.00109173	yes
Arnt2	chr7:84246274-84410038	1.67557	0.435291	-1.9446	0.0006	0.00756245	yes
Ccdc186	chr19:56790962-56813683	20.7792	5.39573	-1.94525	5e-05	0.00109173	yes
Heatr1	chr13:12395374-12438893	36.4525	9.46153	-1.94587	5e-05	0.00109173	yes
Nlgn1	chr3:25431840-26331909	6.06181	1.57337	-1.94589	5e-05	0.00109173	yes
Herc6	chr6:57580991-57665136	7.68269	1.9927	-1.94689	5e-05	0.00109173	yes
Naip2	chr13:100144062-100202122	18.8342	4.86556	-1.95268	5e-05	0.00109173	yes
Ccdc18	chr5:108132913-108232949	4.65961	1.20303	-1.95354	0.0001	0.00193845	yes
Ttc12	chr9:49436960-49486225	3.89826	1.00616	-1.95398	0.0002	0.00333722	yes
Sel1l	chr12:91806042-91849157	89.8653	23.1865	-1.95448	0.00015	0.00264572	yes
Psme4	chr11:30771774-30880361	57.1408	14.7139	-1.95734	5e-05	0.00109173	yes
Casc5	chr2:119047118-119104121	16.4393	4.23022	-1.95834	5e-05	0.00109173	yes
Erbb3	chr10:128569367-128589501	1.17669	0.301994	-1.96215	0.00265	0.0214983	yes
Cenpe	chr3:135212562-135273540	32.48	8.33565	-1.96218	5e-05	0.00109173	yes
Rrm2b	chr15:37923952-37961055	16.266	4.16418	-1.96576	5e-05	0.00109173	yes
Phip	chr9:82866158-82975489	29.6334	7.58312	-1.96636	5e-05	0.00109173	yes
Edil3	chr13:88821471-89323225	11.3982	2.91398	-1.96774	5e-05	0.00109173	yes
Stat1	chr1:52119437-52161865	23.2447	5.93696	-1.96911	5e-05	0.00109173	yes
Arid4b	chr13:14063783-14199603	16.9528	4.32955	-1.96923	5e-05	0.00109173	yes
Inpp4b	chr8:81342561-82127917	7.94088	2.02434	-1.97185	5e-05	0.00109173	yes
Dock4	chr12:40446052-40846488	6.55759	1.66934	-1.97388	5e-05	0.00109173	yes
Cnga3	chr1:37218277-37263384	2.59594	0.659107	-1.97767	0.00065	0.00799534	yes
Bod1l	chr5:41787539-41844315	12.3415	3.12694	-1.98069	5e-05	0.00109173	yes
Parp9	chr16:35926514-35972621	14.0804	3.55433	-1.98604	0.00115	0.012008	yes
Zfp820	chr17:21816875-21845759	14.8652	3.75214	-1.98616	5e-05	0.00109173	yes
Far1	chr7:113513833-113570888	80.829	20.3997	-1.98632	5e-05	0.00109173	yes
Vwa5a	chr9:38718267-38743337	25.481	6.40899	-1.99125	5e-05	0.00109173	yes
Ubn2	chr6:38433924-38512763	5.05349	1.27008	-1.99236	5e-05	0.00109173	yes
Zfp300	chrX:21079149-21089229	0.811674	0.203831	-1.99353	0.00635	0.0394257	yes
Zfp934	chr13:62516796-62558599	3.41804	0.858127	-1.99391	0.001	0.0108869	yes
2210404O09Rik	chr17:21879569-21909926	9.9499	2.49622	-1.99494	0.0001	0.00193845	yes
Smarca5-ps	chr4:145464209-145467961	1.59371	0.398477	-1.99982	0.00215	0.0185434	yes
Pik3c2a	chr7:116337275-116443458	32.1442	8.03389	-2.00039	5e-05	0.00109173	yes
Tpr	chr1:150361310-150466165	90.6166	22.5326	-2.00776	5e-05	0.00109173	yes
Fam126b	chr1:58522805-58586333	5.3671	1.33174	-2.01084	5e-05	0.00109173	yes
Ifi202b	chr1:173962568-173982844	88.4443	21.901	-2.01377	5e-05	0.00109173	yes
Opcml	chr9:27791268-28925048	2.30575	0.57013	-2.01587	0.00035	0.00500786	yes
Dock11	chrX:35888831-36076562	28.6129	7.0616	-2.0186	5e-05	0.00109173	yes
Aff4	chr11:53350766-53421830	60.468	14.9161	-2.01931	5e-05	0.00109173	yes
Gm5141	chr13:62772199-62785808	1.81359	0.44729	-2.01957	0.0025	0.0206377	yes
Ctso	chr3:81932615-81956725	5.29335	1.30319	-2.02214	0.00015	0.00264572	yes
Sp4	chr12:118231685-118301440	2.13783	0.525984	-2.02306	0.00015	0.00264572	yes
Chd9	chr8:90828834-91054508	8.04686	1.97374	-2.0275	5e-05	0.00109173	yes
Smc6	chr12:11265885-11319785	73.0049	17.8549	-2.03168	5e-05	0.00109173	yes
Hap1	chr11:100347326-100356141	1.33559	0.326334	-2.03305	0.00205	0.0179712	yes
Mphosph8	chr14:56668247-56701000	18.679	4.56166	-2.03379	5e-05	0.00109173	yes
Scaper	chr9:55549882-55938115	11.3719	2.77654	-2.03411	5e-05	0.00109173	yes
Atr	chr9:95855417-95951644	24.6022	6.00233	-2.03519	5e-05	0.00109173	yes
Itpr1	chr6:108213095-108551116	5.38056	1.31119	-2.03688	5e-05	0.00109173	yes
Btaf1	chr19:36926078-37014057	36.1524	8.78932	-2.04027	5e-05	0.00109173	yes
Lrrcc1	chr3:14533787-14572658	21.87	5.31303	-2.04134	5e-05	0.00109173	yes
Gas7	chr11:67532997-67688992	14.9842	3.62533	-2.04726	5e-05	0.00109173	yes
Gm5595	chr7:42660107-42692718	3.29012	0.793245	-2.0523	0.0005	0.00659944	yes
Tbc1d32	chr10:56014293-56228689	4.35395	1.04746	-2.05543	5e-05	0.00109173	yes
Slfn9	chr11:82980302-82991830	7.88449	1.89061	-2.06016	5e-05	0.00109173	yes
Fnip1	chr11:54438178-54518241	76.1228	18.1534	-2.06809	5e-05	0.00109173	yes
Herc1	chr9:66350449-66514593	4.18942	0.998602	-2.06877	5e-05	0.00109173	yes
Tsga10	chr1:37754571-37865298	1.34116	0.319441	-2.06986	0.00685	0.0414138	yes
3830403N18Rik	chrX:56136571-56153496	60.7093	14.3952	-2.07633	5e-05	0.00109173	yes
Ttll7	chr3:146852366-146984008	24.9668	5.90749	-2.07939	5e-05	0.00109173	yes
Gas1	chr13:60174404-60177535	97.3179	23.0171	-2.08	0.00015	0.00264572	yes
Myo9a	chr9:59751173-59928866	9.20163	2.16732	-2.08597	5e-05	0.00109173	yes
Akap11	chr14:78492245-78536860	18.8851	4.42742	-2.09271	5e-05	0.00109173	yes
2610008E11Rik	chr10:79064373-79097600	10.8127	2.53486	-2.09275	5e-05	0.00109173	yes
Hltf	chr3:20057810-20118491	21.7586	5.08587	-2.09702	5e-05	0.00109173	yes
Nucb2	chr7:116504368-116540588	50.471	11.7629	-2.10122	5e-05	0.00109173	yes
Ktn1	chr14:47649310-47736564	62.7371	14.5755	-2.10577	5e-05	0.00109173	yes
Egfr	chr11:16752202-16913907	26.7042	6.20324	-2.10597	5e-05	0.00109173	yes
Rb1	chr14:73195501-73325791	10.364	2.40586	-2.10696	5e-05	0.00109173	yes
Zfp964	chr8:69654555-69664453	2.6508	0.610857	-2.11752	0.0034	0.0254881	yes
Eea1	chr10:95940662-96045518	77.695	17.8761	-2.11979	5e-05	0.00109173	yes
Xk	chrX:9272783-9313245	0.79818	0.183311	-2.12242	0.00845	0.0476077	yes
Zfr2	chr10:81233162-81252123	0.839105	0.190848	-2.13643	0.0081	0.046257	yes
Zfp729b	chr13:67589438-67609707	9.57366	2.1668	-2.14351	5e-05	0.00109173	yes
Stag2	chrX:42149411-42277186	88.0587	19.924	-2.14396	5e-05	0.00109173	yes
Gcc2	chr10:58255525-58305592	8.91161	2.01592	-2.14425	5e-05	0.00109173	yes
Naip5	chr13:100211739-100247336	10.9213	2.47027	-2.14441	5e-05	0.00109173	yes
Dtx3l	chr16:35926514-35972621	10.2291	2.30993	-2.14675	0.00095	0.0105379	yes
Eif2ak2	chr17:78852549-78882572	33.9642	7.63734	-2.15288	5e-05	0.00109173	yes
2610305D13Rik	chr4:147611935-147642508	64.1648	14.4011	-2.1556	5e-05	0.00109173	yes
Slc22a21	chr11:53950823-53980027	1.65581	0.371535	-2.15597	0.0071	0.0424446	yes
Aldh6a1	chr12:84409067-84450950	11.0411	2.47533	-2.15719	5e-05	0.00109173	yes
Ifi203	chr1:173920400-173942672	20.1077	4.49896	-2.16009	5e-05	0.00109173	yes
Ptpn4	chr1:119658092-119837071	9.15466	2.04202	-2.16451	5e-05	0.00109173	yes
Zfp595	chr13:67312997-67332560	4.65356	1.03703	-2.16587	0.00015	0.00264572	yes
Vps13b	chr15:35371545-35931229	7.35696	1.62718	-2.17674	5e-05	0.00109173	yes
Gm13242	chr4:145670696-145704437	8.12415	1.79683	-2.17676	5e-05	0.00109173	yes
Tcp11l2	chr10:84576946-84614355	4.56251	1.0088	-2.17719	0.0007	0.0084424	yes
Arhgap5	chr12:52516076-52567851	41.4933	9.16561	-2.17858	5e-05	0.00109173	yes
Akap9	chr5:3928185-4080204	9.34409	2.05457	-2.18521	5e-05	0.00109173	yes
Gm10509	chr17:21690211-21692213	5.02728	1.10502	-2.1857	0.00045	0.00613955	yes
Scn2a1	chr2:65670444-65767447	2.62197	0.570455	-2.20047	5e-05	0.00109173	yes
Zfp960	chr17:17064102-17089631	8.60766	1.86534	-2.20618	5e-05	0.00109173	yes
Irgm1	chr11:48865248-48871346	27.8924	6.03303	-2.20892	5e-05	0.00109173	yes
Gm13157	chr4:147753973-147809788	17.1406	3.69961	-2.21197	5e-05	0.00109173	yes
Dst	chr1:33908224-34308662	60.5649	13.0377	-2.21579	5e-05	0.00109173	yes
Rad50	chr11:53649518-53707319	31.0903	6.66882	-2.22096	5e-05	0.00109173	yes
Nipbl	chr15:8289823-8444463	31.4195	6.73097	-2.22277	5e-05	0.00109173	yes
Rnasel	chr1:153749425-153764221	2.45973	0.526796	-2.22319	5e-05	0.00109173	yes
Cd274	chr19:29367437-29388094	3.15103	0.672422	-2.22838	0.0005	0.00659944	yes
Sema5a	chr15:32244812-32696341	29.7859	6.32872	-2.23464	5e-05	0.00109173	yes
Cep290	chr10:100488288-100589259	7.5948	1.61204	-2.23612	0.0001	0.00193845	yes
Zfp607	chr7:27860584-27880825	5.97838	1.26885	-2.23624	5e-05	0.00109173	yes
Zfp936	chr7:43177587-43192109	2.42724	0.512359	-2.24409	0.0008	0.00932302	yes
Pgm2l1	chr7:100227606-100278872	3.23265	0.680735	-2.24755	5e-05	0.00109173	yes
Atp7a	chrX:106027223-106128160	18.882	3.96288	-2.25239	5e-05	0.00109173	yes
Slc22a18	chr7:143473754-143499332	2.58484	0.541527	-2.25497	0.00615	0.0385713	yes
Atm	chr9:53437121-53536671	10.5736	2.20975	-2.25851	5e-05	0.00109173	yes
Trim21	chr7:102557919-102565482	6.08088	1.26899	-2.26061	5e-05	0.00109173	yes
Ipo7	chr7:110018424-110055114	296.381	61.7824	-2.26218	5e-05	0.00109173	yes
Nlrp4e	chr7:23301191-23362277	21.1157	4.39962	-2.26287	5e-05	0.00109173	yes
Fat1	chr8:44950207-45052257	28.5927	5.94652	-2.26553	5e-05	0.00109173	yes
Tcp11x2	chrX:135654697-135693790	21.29	4.41902	-2.26838	5e-05	0.00109173	yes
Zfp950	chr19:60889748-61140840	13.1601	2.72622	-2.2712	0.0004	0.0055673	yes
Zfp72	chr13:74371425-74376566	4.05828	0.840312	-2.27187	0.00145	0.013996	yes
Sdf2l1	chr16:17130137-17132383	96.0532	19.8139	-2.27732	5e-05	0.00109173	yes
Oas1b	chr5:120812634-120824160	4.57564	0.942074	-2.28006	0.0006	0.00756245	yes
Nsd1	chr13:55209781-55318325	0.569074	0.116816	-2.28438	0.0013	0.0128761	yes
Mctp1	chr13:76384960-77031810	1.19451	0.244579	-2.28805	0.003	0.0234783	yes
Prkdc	chr16:15637865-15842239	6.29774	1.28244	-2.29594	5e-05	0.00109173	yes
Zfp458	chr13:67254917-67269068	1.91977	0.389035	-2.30296	0.0007	0.0084424	yes
Csmd3	chr15:47580637-48791989	1.72521	0.349032	-2.30534	5e-05	0.00109173	yes
Prorsd1	chr11:29511756-29515033	1.58722	0.319586	-2.31223	0.0061	0.0383807	yes
Inpp5j	chr11:3494271-3504821	1.81452	0.365226	-2.31272	0.0015	0.0142676	yes
Oasl2	chr5:114896933-114912245	4.8264	0.970697	-2.31385	0.0001	0.00193845	yes
Gm14403	chr2:177498225-177512311	11.9941	2.40053	-2.3209	5e-05	0.00109173	yes
Tfcp2l1	chr1:118627944-118685168	0.551524	0.11029	-2.32212	0.00235	0.0198458	yes
Xaf1	chr11:72301628-72313733	49.9653	9.96877	-2.32544	5e-05	0.00109173	yes
Zfp712	chr13:67038593-67061170	1.14106	0.227458	-2.3267	0.00465	0.0319249	yes
9830147E19Rik	chr7:42609525-42642604	4.63963	0.920959	-2.3328	5e-05	0.00109173	yes
Atrx	chrX:105797614-105929372	49.8002	9.88121	-2.33339	5e-05	0.00109173	yes
Akap17b	chrX:36608182-36645414	2.34405	0.464843	-2.33419	5e-05	0.00109173	yes
Rb1cc1	chr1:6214661-6276104	28.5723	5.6631	-2.33496	5e-05	0.00109173	yes
Syne2	chr12:75818317-76110928	10.8878	2.14201	-2.34567	5e-05	0.00109173	yes
Rev3l	chr10:39732159-39875205	6.43509	1.26384	-2.34814	5e-05	0.00109173	yes
Zfp182	chrX:21026183-21062038	6.25088	1.22699	-2.34894	5e-05	0.00109173	yes
Cbr2	chr11:120729484-120732021	5.9442	1.15952	-2.35796	0.0018	0.0163027	yes
Gm14327	chr2:177897162-177927850	7.01927	1.36568	-2.36171	0.0024	0.0201377	yes
Lyst	chr13:13590408-13777440	5.573	1.07922	-2.36847	5e-05	0.00109173	yes
Abca5	chr11:110269368-110337716	37.0894	7.17996	-2.36896	5e-05	0.00109173	yes
Cenpf	chr1:189640613-189688086	16.6074	3.19478	-2.37804	5e-05	0.00109173	yes
Zfp738	chr13:67667440-67683512	4.45371	0.856388	-2.37867	5e-05	0.00109173	yes
Zfp677	chr17:21383747-21399265	6.2355	1.19811	-2.37975	5e-05	0.00109173	yes
AI607873	chr1:173723427-173741809	24.952	4.78868	-2.38146	5e-05	0.00109173	yes
Zfp455	chr13:67194505-67209298	1.3826	0.264889	-2.38392	0.00455	0.0313851	yes
Gm6548	chr17:78850504-78852544	23.201	4.37532	-2.40673	5e-05	0.00109173	yes
Rabep1	chr11:70844760-70969973	42.4653	7.97757	-2.41226	5e-05	0.00109173	yes
Trim34b	chr7:104329470-104336617	2.087	0.38944	-2.42195	0.00375	0.0274977	yes
Glcci1	chr6:8509599-8597549	3.98637	0.743448	-2.42277	5e-05	0.00109173	yes
Zfp442	chr2:150407136-150451494	3.20538	0.597188	-2.42424	0.00035	0.00500786	yes
Pak3	chrX:143518590-143797796	48.5702	9.01705	-2.42934	5e-05	0.00109173	yes
Gm14420	chr2:177464741-177479194	32.8382	6.09346	-2.43004	5e-05	0.00109173	yes
Pde5a	chr3:122729157-122859374	6.08855	1.12851	-2.43169	0.0001	0.00193845	yes
Ttc41	chr10:86705810-86776843	1.27224	0.235251	-2.4351	0.00895	0.0496391	yes
Setx	chr2:29124991-29182471	36.9862	6.80991	-2.44128	5e-05	0.00109173	yes
Nr3c2	chr8:76902507-77243639	2.46745	0.454139	-2.44181	0.00015	0.00264572	yes
Dnajc3	chr14:118937931-118981702	89.5019	16.4502	-2.44382	5e-05	0.00109173	yes
Fv1	chr4:147868978-147870358	8.87916	1.62887	-2.44655	0.00015	0.00264572	yes
Dync2h1	chr9:6928502-7177046	2.95954	0.542576	-2.44748	5e-05	0.00109173	yes
Tbc1d8b	chrX:139684995-139754218	20.9182	3.8336	-2.44798	5e-05	0.00109173	yes
Pde1a	chr2:79834452-80129412	3.14411	0.571549	-2.4597	0.00065	0.00799534	yes
Gm14325	chr2:177828990-177840318	26.5841	4.82543	-2.46184	5e-05	0.00109173	yes
Gm7609	chr1:85199610-85213762	4.17821	0.755203	-2.46795	0.00145	0.013996	yes
Rex2	chr4:147021849-147060799	4.59504	0.82852	-2.47147	5e-05	0.00109173	yes
Zfp292	chr4:34803109-34882948	28.5718	5.15064	-2.47177	5e-05	0.00109173	yes
Dync1h1	chr12:110601394-110666944	141.221	25.4006	-2.47502	5e-05	0.00109173	yes
Perm1	chr4:156215926-156221307	4.35406	0.780413	-2.48005	5e-05	0.00109173	yes
Ahnak	chr19:8989283-9076926	355.654	63.7076	-2.48094	0.0008	0.00932302	yes
Phf11d	chr14:59347406-59365490	7.51104	1.34194	-2.48469	5e-05	0.00109173	yes
Thoc2	chrX:41794993-41911901	68.926	12.2245	-2.49527	5e-05	0.00109173	yes
Kcnq1ot1	chr7:143107253-143427042	1.51091	0.267274	-2.49903	5e-05	0.00109173	yes
Plcb4	chr2:135741829-136013068	7.10787	1.25228	-2.50486	5e-05	0.00109173	yes
Serpini1	chr3:75557532-75642523	3.0003	0.526747	-2.50993	0.0004	0.0055673	yes
Zfp62	chr11:49203499-49218816	24.1059	4.18485	-2.52614	5e-05	0.00109173	yes
Trim34a	chr7:104244456-104262236	2.69945	0.466403	-2.53302	0.00085	0.00976046	yes
Ago3	chr4:126340677-126429542	7.14671	1.22965	-2.53903	5e-05	0.00109173	yes
Hsp90b1	chr10:86690840-86705444	2101.73	361.384	-2.53997	0.00285	0.0226515	yes
Gm13544	chr2:58267452-58357758	4.1544	0.713492	-2.54167	5e-05	0.00109173	yes
Pgap1	chr1:54472999-54557684	3.31459	0.56879	-2.54286	5e-05	0.00109173	yes
Mdn1	chr4:32657118-32775217	23.656	4.04922	-2.54649	5e-05	0.00109173	yes
Zfp729a	chr13:67617000-67637753	9.35748	1.59992	-2.54812	5e-05	0.00109173	yes
Usp34	chr11:23306894-23498039	39.2054	6.70109	-2.54858	5e-05	0.00109173	yes
Ifit1	chr19:34640888-34650009	14.6515	2.46447	-2.57169	5e-05	0.00109173	yes
Ccdc173	chr2:69758056-69789486	2.65001	0.444602	-2.57541	0.0012	0.0122047	yes
Lrba	chr3:86224689-86782694	10.3543	1.73512	-2.57712	5e-05	0.00109173	yes
Ankrd12	chr17:65967500-66077046	28.427	4.72563	-2.58868	5e-05	0.00109173	yes
Klhl28	chr12:64942439-64965536	9.92965	1.64242	-2.59592	5e-05	0.00109173	yes
AU041133	chr10:82128012-82153065	4.96312	0.815024	-2.60633	5e-05	0.00109173	yes
Lyz2	chr10:117277540-117282272	3.06597	0.49224	-2.63891	0.00695	0.0418246	yes
Trip11	chr12:101837371-101913171	14.2082	2.27647	-2.64185	5e-05	0.00109173	yes
Ranbp2	chr10:58446851-58494154	47.2611	7.55744	-2.64468	5e-05	0.00109173	yes
Elavl2	chr4:91250766-91399984	11.0644	1.75707	-2.65468	5e-05	0.00109173	yes
Naip1	chr13:100407769-100452864	0.865185	0.136618	-2.66286	0.00195	0.0173011	yes
Uba7	chr9:107975566-107984056	2.94018	0.458124	-2.68209	0.00025	0.00395256	yes
Cd300lb	chr11:114922780-114934386	2.19689	0.341378	-2.68602	0.00125	0.0125502	yes
Vps13a	chr19:16615365-16780933	26.9701	4.18024	-2.6897	5e-05	0.00109173	yes
Pcdh10	chr3:45378397-45439309	2.05973	0.318489	-2.69314	5e-05	0.00109173	yes
Kng2	chr16:22985851-23029101	2.01396	0.305938	-2.71872	0.0027	0.0218286	yes
Vps13c	chr9:67840395-67995634	7.61507	1.1564	-2.71922	5e-05	0.00109173	yes
Ddx58	chr4:40203776-40239825	45.4098	6.87406	-2.72377	5e-05	0.00109173	yes
Txlnb	chr10:17796218-17845663	1.4966	0.226071	-2.72684	0.00095	0.0105379	yes
Ascc3	chr10:50592668-50851202	36.8444	5.55505	-2.72958	5e-05	0.00109173	yes
Gm13212	chr4:145617145-145624394	27.4146	4.1231	-2.73314	5e-05	0.00109173	yes
Sacs	chr14:61138456-61258490	5.24473	0.77112	-2.76584	0.0002	0.00333722	yes
Zfp935	chr13:62453015-62466812	10.3855	1.5256	-2.76713	5e-05	0.00109173	yes
4932438A13Rik	chr3:36863105-37053033	20.3797	2.95844	-2.78423	5e-05	0.00109173	yes
Gm14305	chr2:176708352-176721813	12.0954	1.73036	-2.80531	5e-05	0.00109173	yes
Ccdc178	chr18:21810896-22171396	0.651863	0.0922238	-2.82136	0.0058	0.0370286	yes
Platr14	chr2:104559183-104571429	16.8018	2.36644	-2.82783	5e-05	0.00109173	yes
Lipa	chr19:34492315-34527474	123.74	17.4129	-2.82908	5e-05	0.00109173	yes
Gm15097	chrX:149784478-149984982	4.67417	0.653853	-2.83767	5e-05	0.00109173	yes
Aox4	chr1:58210396-58268596	1.98081	0.275756	-2.84463	0.00015	0.00264572	yes
Fam13a	chr6:58933535-59024502	2.70008	0.375186	-2.84733	0.0001	0.00193845	yes
Sycp1	chr3:102818498-102936100	1.44537	0.199206	-2.85911	0.00135	0.0132044	yes
Tlr1	chr5:64924679-64933558	1.01682	0.139326	-2.86752	0.00785	0.0453363	yes
Trim12c	chr7:104338753-104353358	1.93675	0.264677	-2.87133	0.001	0.0108869	yes
Zfp945	chr17:22846696-22867134	13.461	1.82078	-2.88616	5e-05	0.00109173	yes
D130040H23Rik	chr8:69271079-69303375	5.23624	0.706837	-2.88908	0.0001	0.00193845	yes
Gm14124	chr2:150257516-150270300	12.1288	1.62751	-2.8977	5e-05	0.00109173	yes
Zfp433	chr10:81863933-81881086	2.61584	0.342797	-2.93184	0.0011	0.0116727	yes
Tlr3	chr8:45395664-45410539	9.36419	1.2102	-2.95191	5e-05	0.00109173	yes
Epha7	chr4:28813130-28967503	2.64514	0.337177	-2.97177	5e-05	0.00109173	yes
Irf7	chr7:141263182-141266424	6.74899	0.797341	-3.0814	5e-05	0.00109173	yes
Oas1g	chr5:120876141-120887613	3.81629	0.43381	-3.13704	0.0005	0.00659944	yes
Ero1lb	chr13:12565882-12609528	12.6833	1.43635	-3.14246	5e-05	0.00109173	yes
Hck	chr2:153108467-153151441	1.33827	0.151124	-3.14657	0.0051	0.0339048	yes
Cyfip2	chr11:46193848-46589232	4.38634	0.494775	-3.14817	0.00635	0.0394257	yes
Ccdc88a	chr11:29374171-29510808	35.7821	3.93574	-3.18453	5e-05	0.00109173	yes
Samd9l	chr6:3372257-3399571	19.5113	2.07648	-3.2321	5e-05	0.00109173	yes
Rsad2	chr12:26442742-26456452	1.30761	0.13894	-3.2344	0.0028	0.0223752	yes
Trim30a	chr7:104409025-104465193	29.7486	3.09926	-3.26283	5e-05	0.00109173	yes
Usp18	chr6:121245905-121270917	15.4497	1.58011	-3.28948	5e-05	0.00109173	yes
Espnl	chr1:91322074-91348303	1.69276	0.168418	-3.32926	0.00035	0.00500786	yes
Pyhin1	chr1:173630858-173647928	0.73953	0.0730161	-3.34032	0.00815	0.0464072	yes
Gm14436,Gm8923	chr2:175470024-175483322	21.7742	2.09219	-3.37954	5e-05	0.00109173	yes
Gm15107	chrX:148180723-148521446	11.5317	1.10084	-3.38893	5e-05	0.00109173	yes
Igtp	chr11:58199555-58207592	13.6279	1.23729	-3.46131	5e-05	0.00109173	yes
Nbeal1	chr1:60180598-60334705	14.951	1.33853	-3.48152	5e-05	0.00109173	yes
Sorbs1	chr19:40292039-40513812	1.77576	0.157653	-3.49361	5e-05	0.00109173	yes
Gm7444	chr9:56027635-56031573	0.823916	0.0723132	-3.51017	0.0072	0.0428679	yes
Lincenc1	chr13:97434969-97497664	51.763	4.42633	-3.54774	5e-05	0.00109173	yes
Irgm2	chr11:58214976-58222783	9.4041	0.787193	-3.5785	5e-05	0.00109173	yes
Aox1	chr1:58029968-58106410	13.6029	1.13197	-3.58701	5e-05	0.00109173	yes
Psd3	chr8:67689081-67974574	1.41229	0.112193	-3.65398	5e-05	0.00109173	yes
Mov10l1	chr15:88982993-89055152	1.00342	0.0784104	-3.67774	0.0024	0.0201377	yes
Luzp4	chrX:148882575-148924139	2.36507	0.182682	-3.69447	0.00185	0.0165893	yes
Parp14	chr16:35832877-35871382	8.8983	0.684794	-3.69979	5e-05	0.00109173	yes
Jakmip1	chr5:37050856-37125298	1.87767	0.14345	-3.71032	0.00195	0.0173011	yes
Aldh3a1	chr11:61208741-61218416	278.728	21.1109	-3.7228	5e-05	0.00109173	yes
Rhox5	chrX:37754607-37808878	21.9399	1.63096	-3.74976	5e-05	0.00109173	yes
Lcn2	chr2:32384636-32387739	5.18837	0.375722	-3.78754	0.0062	0.0387814	yes
Gbp2	chr3:142620662-142638008	5.10427	0.364453	-3.8079	0.0004	0.0055673	yes
Trpc5os	chrX:144381670-144688180	2.36841	0.162439	-3.86595	0.001	0.0108869	yes
Peg3	chr7:6705959-6730419	9.48727	0.645015	-3.87859	5e-05	0.00109173	yes
2810021J22Rik	chr11:58867239-58884338	3.61333	0.243826	-3.88941	0.0001	0.00193845	yes
Rnf150	chr8:82863355-83091271	4.89291	0.319229	-3.93803	5e-05	0.00109173	yes
Mx2	chr16:97536080-97560901	16.4651	0.88561	-4.21659	5e-05	0.00109173	yes
[truncated: 11 more rows]
